# Supplementary material for: Accidents and injuries related to powered paragliding: a cross-sectional study
Source: PubMed Central journal article supplement — BMJ Open. 2014 Aug 28;4(8):e005508. doi: 10.1136/bmjopen-2014-005508 (PMC4156803; doi:10.1136/bmjopen-2014-005508), 2014-08-28
Supplement: bmjopen-2014-005508.draft_revisions.pdf [file bmjopen-2014-005508.draft_revisions.pdf]

# BMJ Open

## Powered paragliding accidents and injuries: a cross-sectional study to investigate this extreme sport's risks

|                                 |                                                                                                                                                                                                                                                                                         |
|---------------------------------|-----------------------------------------------------------------------------------------------------------------------------------------------------------------------------------------------------------------------------------------------------------------------------------------|
| Journal:                        | <i>BMJ Open</i>                                                                                                                                                                                                                                                                         |
| Manuscript ID:                  | bmjopen-2014-005508                                                                                                                                                                                                                                                                     |
| Article Type:                   | Research                                                                                                                                                                                                                                                                                |
| Date Submitted by the Author:   | 17-Apr-2014                                                                                                                                                                                                                                                                             |
| Complete List of Authors:       | Feletti, Francesco; Azienda Unità Sanitaria Locale della Romagna, Presidio Ospedaliero di Ravenna, Ospedale S. Maria delle Croci, U.O.Radiologia; ExtremeSportMed, Goin, Jeff; B.S. Aeronautical Science, Embry Riddle Aeronautical University, ; U.S. Powered Paragliding Association, |
| <b>Primary Subject Heading</b>: | Sports and exercise medicine                                                                                                                                                                                                                                                            |
| Secondary Subject Heading:      | General practice / Family practice                                                                                                                                                                                                                                                      |
| Keywords:                       | SPORTS MEDICINE, WOUND MANAGEMENT, Spine < ORTHOPAEDIC & TRAUMA SURGERY, Hand & wrist < ORTHOPAEDIC & TRAUMA SURGERY, Orthopaedic sports trauma < ORTHOPAEDIC & TRAUMA SURGERY, Shoulder < ORTHOPAEDIC & TRAUMA SURGERY                                                                 |
|                                 |                                                                                                                                                                                                                                                                                         |

SCHOLARONE™  
Manuscripts

Peer review only

1  
2  
3  
4  
5  
6  
7  
8  
9  
10  
11  
12  
13  
14  
15  
16  
17  
18  
19  
20  
21  
22  
23  
24  
25  
26  
27  
28  
29  
30  
31  
32  
33  
34  
35  
36  
37  
38  
39  
40  
41  
42  
43  
44  
45  
46  
47  
48  
49  
50  
51  
52  
53  
54  
55  
56  
57  
58  
59  
60

TITLE PAGE

Article Type: **Original article**

Title: **Powered paragliding accidents and injuries: a cross-sectional study to investigate this extreme sport's risks**

Keywords

**Extreme Sports, Sporting injuries, Protective clothing, Motor sports, Injury prevention**

**Corresponding Author**

Francesco Feletti, MD, □

*Presidio Ospedaliero di Ravenna, Ausl della Romagna, U.O.Radiologia □ □*

*ExtremeSportMed □ Imola - Bologna, Italy*

*e-mail: [feletti@extremesportmed.net](mailto:feletti@extremesportmed.net)*

*Phone: +39 393 123 0 456*

*Postal Address: Viale Amendola 91 40026 Imola (Bologna)*

**Authors**

Francesco **Feletti, MD**, □

*Ospedale di Ravenna S. Maria delle Croci - AUSL della Romagna,*

*U.O.Radiologia □ Ravenna, Italy □ □*

*ExtremeSportMed □ Imola - Bologna, Italy*

**Jeff Goin, Capt,**

*B.S. Aeronautical Science, Embry Riddle Aeronautical University □ Daytona Beach,*

*Florida, United States □*

*U.S. Powered Paragliding Association □ Dover, Delaware, United States*

*Word count - excluding title page, abstract, references, figures and tables:*

**2942**

**Powered paragliding accidents and injuries: a cross-sectional study to investigate this extreme**

**sport's risks****ABSTRACT****Background/Aim -**

Powered paragliding is usually confused with paragliding or considered a variation of this sport. However, there are distinct differences between the two sports; the use of a motor in powered paragliding results in a different manner of flying, and allows the sport to be practised in different environments. There are no existing studies in literature on the traumatology of powered paragliding, and we hypothesised that the differences between these two sports result in different types of injuries.

**Methods -**

To test this hypothesis, we analysed 384 incident reports gathered by the United States Powered Paragliding Association from 1995 to 2012.

**Results -**

Powered paragliding accidents occur in different phases of flight from those of paragliding (takeoff vs. landing) and the pattern of injuries is different: the upper limbs are most affected, whereas spinal injuries are less frequent.

Some kinds of injuries, such as burns or hand injuries due to the contact with the propellor, are specific to this sport.

Finally, contrary to the belief held up to now by experts of this sport, the number of fatal accidents is not lower than those which occur in paragliding and in hang-gliding.

**Conclusions -**

The results of this study suggest that in future this sport should be studied using studies and case reports distinct from those of paragliding. Furthermore, to prevent certain injuries specific to powered paragliding, various types of safety gear and equipment should be recommended or made obligatory for those practising this sport.

**Strengths and limitations of this study**

The first study in literature on powered-paragliding

A large amount of data (384 incident reports) collected prospectively from 1995 to 2012

This study is based on incident reports filed by participants or witnesses.

A specific form inclusive of detailed injury informations (body part affected, severity of the injury, medical assistance, extensive description of the event and its consequences) was used to collect data.

## New findings

1. Power paragliding is a very different sport from paragliding, and accidents occur more frequently during takeoff than landing.
2. The motor may aggravate the dynamics of powered paragliding accidents, making falls into water particularly dangerous, and causing characteristic injuries such as burns.
3. Compared to paragliding, the upper limbs are the body area most prone to injury in powered paragliding; certain injuries such as hand trauma due to contact with the motor propellor are specific to powered paragliding, and the use of protective devices is therefore recommended.
4. Although powered paragliding is generally considered safer than paragliding, in this study the ratio of fatal accidents to total accidents was comparable to those reported in literature for paragliding.

## Introduction

Powered paragliding or paramotor (PPG) is a sport in which the pilot flies by means of a wing similar to that of paragliding (P), the sport from which it derives, under which the crew is suspended by means of long lines. It is a completely different sport from P because the equipment used includes a motor worn on the back and held in place by a harness (Fig. 1).

Compared to other aerial sports, P nevertheless remains the most similar to PPG: both require the pilot to keep the wing inflated by means of his own weight and skill.

PPG was invented in the 1980's and rapidly gained popularity, so much so that various national and international competitions have been held throughout the world over the last few years.

As PPG has grown in popularity, the number of accidents associated with this sport has inevitably increased. A knowledge of accident dynamics, the type of injuries sustained and the body area affected is of vital importance for sports medicine to provide an insight into the types of conduct, protective clothing and safety systems to adopt to improve the safety of any given sport.

A careful examination of the literature leads us to conclude that there are no existing studies of this sport in medical literature: in a recent literature review [1], this sport is only mentioned among the variations of P, with which it is normally grouped together.

Given that the way of flying a paramotor is very different to that of a paraglider, we hypothesised that the accident and injury types differ greatly between the two sports as a result.

The aim of this study is to clarify the dynamics of paramotoring accidents, the conditions in which these occur, the type of injuries sustained, and to highlight any differences with respect to P.

## Materials and methods

We analysed the 384 incident reports of the accidents arising between 1995 and the end of 2012 (the

start date of the present study), that the US Powered Paragliding Association (USPPA) collected prospectively using a form published on its website.

The forms submitted had been completed by the pilot involved, a witness who had seen the accident, or by the Association itself based on the information gathered.

The form included: drop-down menu lists, checklists and text fields and consisted of five sections:

1-General information (date, time and place of the accident);

2-Pilot information, including demographic information and details of the pilot's PPG experience;

3-Details of the accident, including a description of the type of accident, the main cause, weather conditions at the time, characteristics of the takeoff and landing area, and details of the pilot's clothing and equipment;

4-Injury information, including details of any injuries, the body part affected, severity of the injury, any medical assistance sought and/or collateral damage to persons or things.

5-Narrative, an extended description of the event and its consequences.

This final section has been very useful for our work; having read all the reports individually, the majority provide valuable information, particularly with regard to the medical consequences of the accidents.

The data published by the USPPA is public and anonymous; its use for study and publication purposes was authorised beforehand by the USPPA.

The data was analysed using descriptive statistics, using the software Wizard Pro 1.3.27 and the *chi-square* test.

The following definition of injury has been adopted: “any physical complaint sustained by an athlete that results from training or competition, irrespective of the need for medical attention or time lost from sports activities”[10-12].

Each incident report was also given a NACA(National Advisory Committee of Aeronautics) Score: a 7-point system (table 1) developed to assess the severity of injuries and diseases sustained or developed during aviation accidents. Based on the available data, nevertheless, it was not possible to distinguish between classes V and VI in all cases.

**Table 1: NACA Score**

| Category | Description                                                        | Example               |
|----------|--------------------------------------------------------------------|-----------------------|
| NACA 0   | No injury or disease.                                              |                       |
| NACA I   | Slight injury or illness. No acute medical intervention necessary. | E.g. slight abrasion. |

|          |                                                                                                                                                                               |                                                                                           |
|----------|-------------------------------------------------------------------------------------------------------------------------------------------------------------------------------|-------------------------------------------------------------------------------------------|
| NACA II  | Slight to moderately heavy injury or illness. Further diagnostic examination needed or outpatient medical investigation, but usually no emergency medical measures necessary. | E.g. fracture of a finger bone, moderate cuts, dehydration.                               |
| NACA III | Moderate to heavy but not life-threatening disorder. Frequently emergency medical measures on the site                                                                        | E.g. femur fracture, milder stroke, smoke inhalation                                      |
| NACA IV  | Heavy injury or illness where rapid development into a life threatening condition can not be excluded. Emergency medical care is required                                     | E.g. vertebral injury with neurological deficit, severe asthma attack; drug poisoning     |
| NACA V   | Acute vital (life threatening) danger                                                                                                                                         | E.g. third grade skull or brain trauma, severe heart attack, significant opioid poisoning |
| NACA VI  | Breath and/or cycle stop and/or reanimation                                                                                                                                   | ---                                                                                       |
| NACA VII | Death                                                                                                                                                                         | ---                                                                                       |

Both categories cover conditions posing an immediate threat to life and requiring immediate emergency medical assistance: therefore we have decided to consider them as a single category.

We subsequently focused on the accidents resulting in injuries (disregarding those with a NACA score of 0), and divided these into 3 classes based on the severity of the injuries:

1-minor (NACA I, II), usually not requiring emergency medical measures

2-major (NACA III, IV, V, VI), almost always requiring emergency medical measures

3-fatal (NACA VII).

We associated the incidents thus classified with the accident dynamics cited in the incident reports and with the phase of flight in which the accidents occurred. We also explored the correlation between injury severity and pilot rating, and between injury severity and accident dynamics.

## Results

The pilots involved in power paragliding accidents were aged between 24 and 72 (average age= 44.46, median= 48, SD= 9.542).

One incident report had been submitted twice, therefore one copy was retained and the other was excluded.

The number of incident reports/year is shown in table 2.

### Table 2. Accidents/Year

| Year | Number of Reports |
|------|-------------------|
| 1995 | 1                 |
| 1996 | 1                 |
| 1998 | 1                 |
| 2000 | 2                 |
| 2001 | 10                |
| 2002 | 10                |
| 2003 | 18                |
| 2004 | 30                |
| 2005 | 56                |
| 2006 | 57                |
| 2007 | 42                |
| 2008 | 42                |
| 2009 | 30                |
| 2010 | 31                |
| 2011 | 24                |
| 2012 | 29                |

The majority of the incidents described occurred in the US, while 26 incidents occurred elsewhere: Canada (8), Mexico (5), Panama (1), China (1), Japan (1), Malaysia (1), Indonesia (Java)(1), Europe (8): of which Spain (1), Belgium (1), United Kingdom (3), Italy (1), Romania (1), Unknown (1). Only three incidents involved a female pilot.

Pilot injuries were classified according to NACA category (table 3): 23 incidents were fatal.

**Table 3. NACA Score of PPG accidents in this study**

| NACA Category | Pilots | %    |
|---------------|--------|------|
| <b>0</b>      | 194    | 50,6 |
| <b>I</b>      | 59     | 15,4 |
| <b>II</b>     | 48     | 12,5 |
| <b>III</b>    | 43     | 11,2 |

|               |    |     |
|---------------|----|-----|
| <b>IV</b>     | 11 | 2,9 |
| <b>V + VI</b> | 5  | 1,3 |
| <b>VII</b>    | 23 | 6   |

The following factors were taken into consideration: the experience of the pilots involved (table 4), the type of terrain in the takeoff/landing areas (table 5), the phase of flight during which the accident took place (table 6), the primary cause (table 7) and the type of accident (table 8).

**Table 4. Pilot Rating**

| <b>Pilot Rating</b>   | <b>count</b> | <b>%</b> |
|-----------------------|--------------|----------|
| <b>Not Applicable</b> | 45           | 11,7     |
| <b>None</b>           | 49           | 12,8     |
| <b>Student</b>        | 16           | 4,1      |
| <b>PPG1</b>           | 52           | 13,5     |
| <b>PPG2</b>           | 98           | 25,5     |
| <b>PPG3</b>           | 58           | 15,1     |
| <b>Instructor</b>     | 35           | 9,1      |
| <b>Unknown</b>        | 23           | 6        |
| <b>Other</b>          | 7            |          |

**Table 5. Terrain in which accidents occurred**

| <b>Terrain</b>        | <b>Tot</b> | <b>%</b> |
|-----------------------|------------|----------|
| <b>Flat</b>           | 270        | 70,5     |
| <b>Not Applicable</b> | 44         | 11,4     |
| <b>Hilly</b>          | 34         | 8,8      |
| <b>Water</b>          | 10         | 2,6      |
| <b>Mountainous</b>    | 10         | 2,6      |
| <b>Unknown</b>        | 10         | 2,6      |
| <b>Other</b>          | 5          | 1,3      |



Table 6. Phase of Flight

| Phase of Flight | Count | %    |
|-----------------|-------|------|
| Takeoff         | 126   | 32,8 |
| Inflation       | 22    | 5,7  |
| Runup           | 17    | 4,4  |
| Not Applicable  | 30    | 7,8  |
| Cruise          | 107   | 27,9 |
| Landing         | 24    | 6    |
| Approach        | 26    | 6,7  |
| Other           | 26    | 6,7  |
| After Landing   | 5     | 1,3  |

Table 7. Primary cause of accidents

| Primary cause                                        | Tot. | %    |
|------------------------------------------------------|------|------|
| Pilot Error on Launch                                | 71   | 18,5 |
| Pilot Error In Flight                                | 85   | 22,1 |
| Mechanical Failure Powerplant/Propeller              | 49   | 12,7 |
| Pilot Error Preflight/Postflight                     | 38   | 9,9  |
| Other                                                | 23   | 6    |
| Weather (Gust, Thermal, Rain, Wind increase, etc..). | 22   | 5,7  |
| Pilot Error and Weather                              | 17   | 4,4  |
| Pilot Error and Mechanical Failure                   | 17   | 4,4  |
| Not Applicable                                       | 17   | 4,4  |
| Pilot error on landing                               | 11   | 2,9  |
| Mechanical Failure/Wing                              | 8    | 2    |
| Unknown                                              | 7    | 1,8  |

|                                   |   |     |
|-----------------------------------|---|-----|
| <b>Wake</b>                       | 6 | 1,6 |
| <b>Mechanical Failure/harness</b> | 5 | 1,3 |
| <b>Fuel Exhaustion</b>            | 5 | 1,3 |
| <b>Tight takeoff/LZ Area</b>      | 2 | 0,5 |

Table 8. Type of accidents

| Type of incident                                    | Tot. | %    |
|-----------------------------------------------------|------|------|
| <b>Collision with Terrain/Obstruction on Ground</b> | 76   | 19,8 |
| <b>Powerplant Equipment Malfunction</b>             | 58   | 15,1 |
| <b>Body contact with spinning prop</b>              | 43   | 11,2 |
| <b>Hard Landing</b>                                 | 40   | 10,4 |
| <b>Fall</b>                                         | 37   | 9,7  |
| <b>Wing Malfunction or Deflation</b>                | 35   | 9,1  |
| <b>Other</b>                                        | 29   | 7,5  |
| <b>Handling</b>                                     | 20   | 5,2  |
| <b>Line Tangle/Damage</b>                           | 15   | 3,9  |
| <b>Collision with other Aircraft/Ultralight</b>     | 14   | 3,6  |
| <b>Water Immersion</b>                              | 10   | 2,6  |
| <b>Not Applicable</b>                               | 6    | 1,5  |

Out of 383 accidents, 217(56.6%) pilots sustained no injuries, 118(30.8%) a single injury, 39(10.2%) multiple injuries, while five (1.3%) suffered systemic medical conditions; in particular two pilots suffered generalised burns, two sustained multiple injuries and one drowned (table 9).

Table 9. Medical consequences in 166 non-fatal accidents in our study.

| Body Area Affected | Injury Type    | No. Cases | Tot. |
|--------------------|----------------|-----------|------|
| <b>Head</b>        | Concussion     | 2         | 3    |
|                    | Open Wounds    | 1         |      |
| <b>Neck</b>        | Fractures (C2) | 1         | 1    |

|                 |                            |    |    |
|-----------------|----------------------------|----|----|
| <b>Chest</b>    | Fractures (Ribs)           | 1  | 2  |
|                 | Contusions                 | 1  |    |
| <b>Shoulder</b> | Open Wounds                | 4  | 17 |
|                 | Fractures                  | 6  |    |
|                 | Lacerations                | 1  |    |
|                 | Bruising                   | 4  |    |
|                 | Dislocation                | 2  |    |
|                 | Sprain                     | 1  |    |
|                 | Strain/muscle rupture/tear | 1  |    |
|                 | Tendon Injury              | 1  |    |
| <b>Arm</b>      | Other                      | 2  | 7  |
|                 | Contusion                  | 2  |    |
|                 | Open Wounds                | 1  |    |
|                 | Fracture                   | 1  |    |
|                 | Laceration                 | 3  |    |
| <b>Forearm</b>  | Unknown                    | 1  | 1  |
| <b>Wrist</b>    | Fracture                   | 1  | 1  |
| <b>Hand</b>     | Fracture                   | 6  | 27 |
|                 | Fracture With Amputation   | 11 |    |
|                 | Open Wound                 | 6  |    |
|                 | Laceration                 | 2  |    |
|                 | Strain/muscle rupture/tear | 1  |    |
|                 | Contusion                  | 1  |    |
| <b>Abdomen</b>  | Contusion                  | 1  | 1  |
| <b>Back</b>     | Other                      | 1  | 13 |
|                 | Fractures                  | 4  |    |
|                 | Strain/muscle rupture/tear | 1  |    |

|                                |                                       |   |    |
|--------------------------------|---------------------------------------|---|----|
|                                | Contusion                             | 1 |    |
|                                | Unknown                               | 6 |    |
| <b>Pelvis</b>                  | Fracture                              | 1 | 1  |
| <b>Thigh</b>                   | Fracture                              | 2 | 3  |
|                                | Open Wound                            | 1 |    |
| <b>Knee</b>                    | Unknown                               | 1 | 12 |
|                                | Contusion                             | 2 |    |
|                                | Ligamentous rupture                   | 2 |    |
|                                | Dislocation                           | 1 |    |
|                                | Strain/muscle rupture/tear            | 1 |    |
|                                | Sprain                                | 4 |    |
|                                | Ligamentous rupture and torn meniscus | 1 |    |
| <b>Calf</b>                    | Lacerations                           | 1 | 7  |
|                                | Fracture                              | 4 |    |
|                                | Wound                                 | 1 |    |
|                                | Contusion                             | 1 |    |
| <b>Ankle</b>                   | Fracture                              | 4 | 17 |
|                                | Sprain                                | 6 |    |
|                                | Dislocation                           | 1 |    |
|                                | Unknown                               | 2 |    |
|                                | Contusion                             | 3 |    |
|                                | Ligamentous rupture                   | 1 |    |
| <b>Foot</b>                    | Contusion                             | 1 | 5  |
|                                | Fracture                              | 2 |    |
|                                | Other                                 | 1 |    |
|                                | Unknown                               | 1 |    |
| <b>Back, Calf, Ankle, Foot</b> | Fractures                             |   |    |

|                                                     |                                               |
|-----------------------------------------------------|-----------------------------------------------|
| <b>Face, Wrist, Forearm</b>                         | Fractures                                     |
| <b>Back, Thigh, Spinal</b>                          | Fractures                                     |
| <b>Face, Shoulder, Pelvis</b>                       | Fractures, Tendon rupture, Ligament Injuries  |
| <b>Chest, Thigh, Knee</b>                           | Fracture, Contusions                          |
| <b>Face, Arm</b>                                    | Fracture Lacerations                          |
| <b>Back, Wrist, Hand, Pelvis, Ankle, Foot, Knee</b> | Other                                         |
| <b>Face, Back, Shoulder</b>                         | Other                                         |
| <b>Neck, Back, Shoulder, Arm, Elbow, Forearm</b>    | Burns                                         |
| <b>Arm, Thigh, Calf, Forearm</b>                    | Exposed Fracture, Burns                       |
| <b>Face, Shoulder, Arm, Knee</b>                    | Lacerations                                   |
| <b>Face, Arm, Thigh</b>                             | Lacerations                                   |
| <b>Forearm, Wrist, Hand, Foot</b>                   | Lacerations                                   |
| <b>Neck, Shoulder</b>                               | Unknown                                       |
| <b>Back, Foot</b>                                   | Unknown                                       |
| <b>Chest, Thigh</b>                                 | Open Wounds                                   |
| <b>Arm, Pelvis, Calf</b>                            | Fracture, Dislocation                         |
| <b>Wrist, Hand</b>                                  | Contusion                                     |
| <b>Shoulder, Arm, Pelvis</b>                        | Contusion                                     |
| <b>Pelvis<br/>Shoulder And Arm</b>                  | Strain/muscle rupture/tear,<br>Tendon rupture |
| <b>Head, Face, Pelvis</b>                           | Concussion, Fracture, Internal Bruising       |
| <b>Back, Ankle</b>                                  | Fracture, Sprain, Bruising                    |
| <b>Elbow, Forearm, Thigh, Calf</b>                  | Open Wound, Lacerations                       |
| <b>Face, Arm, Calf</b>                              | Burns                                         |
| <b>Pelvis, Back</b>                                 | Fractures                                     |
| <b>Wrist, Arm, Hand</b>                             | Sprain                                        |
| <b>Arm, Knee</b>                                    | Lacerations                                   |

39

|                                                         |                            |   |
|---------------------------------------------------------|----------------------------|---|
| Chest, Arm                                              | Burnt                      |   |
| Arm, Forearm, Wrist                                     | Fracture                   |   |
| Calf, Ankle, Foot, Knee                                 | Unknown                    |   |
| Chest, Back, Shoulder, Arm, Elbow, Forearm, Thigh, Knee | Abrasions                  |   |
| Back, Thigh                                             | Unknown                    |   |
| Arm, Elbow, Calf Ankle                                  | Burns, Open Wound, Sprains |   |
| Forearm, Thigh, Calf                                    | Soft Tissue, Burns         |   |
| Head, Arm, Hand                                         | Unknown                    |   |
| Back, Shoulder, Arm, Abdomen                            | Open Wound, Soft Tissue    |   |
| Head, Back, Forearm, Wrist, Thigh, Calf, Knee, Foot     | Contusions                 |   |
| Chest, Arm, Calf                                        | Unknown                    |   |
| Head, Shoulder, Arm, Elbow, Forearm                     | Unknown                    |   |
| Multiple trauma                                         |                            | 2 |
| Generalised burns                                       |                            | 2 |
| Drowning                                                |                            | 1 |
| Unknown                                                 |                            | 4 |

To identify the areas of the body most affected and therefore most critical for the development of protective clothing, we calculated the number of injuries sustained in each body area (table 10). Out of a total of 252 injuries, the areas of the body most affected were the upper limbs (43.2%) followed by the lower limbs (32.5%) and the spine (10.3%)(table 11).

**Table 10. Distribution of the injuries sustained in the different body regions in power paragliding as emerged from this study.**

| Body region | Body area affected | No. Cases | Tot. | % of injury total |
|-------------|--------------------|-----------|------|-------------------|
| Head        | Head               | 7         | 18   | 7.1%              |
|             | Neck               | 3         |      |                   |

|                   |          |    |     |       |
|-------------------|----------|----|-----|-------|
| <b>Chest</b>      | Face     | 8  | 7   | 2.7%  |
|                   | Chest    | 7  |     |       |
| <b>Upper Limb</b> | Shoulder | 27 | 109 | 43.2% |
|                   | Arm      | 26 |     |       |
|                   | Forearm  | 11 |     |       |
|                   | Wrist    | 8  |     |       |
|                   | Elbow    | 5  |     |       |
|                   | Hand     | 32 |     |       |
| <b>Abdomen</b>    | Abdomen  | 2  | 2   | 0.7%  |
| <b>Spine</b>      | Spine    | 26 | 26  | 10.3% |
| <b>Pelvis</b>     | Pelvis   | 8  | 8   | 3.2%  |
| <b>Lower Limb</b> | Thigh    | 13 | 82  | 32.5% |
|                   | Knee     | 19 |     |       |
|                   | Calf     | 17 |     |       |
|                   | Ankle    | 22 |     |       |
|                   | Foot     | 11 |     |       |

Of the twenty-three fatal accidents, five were the result of an involuntary landing in water: one autopsy revealed the cause of drowning to be head injury with haemorrhage and loss of consciousness.

Another two accidents were fatal due to cerebral spine fractures with spinal cord damage.

In four cases, death was caused by severe head trauma. In all remaining cases, death was the result of high-energy multi-trauma, although the reports do not allow us to identify the precise injuries responsible for death, even if this were possible.

Distribution of the accidents which caused injuries in the three classes minor, major and fatal is shown in Fig. 2. The relationship between accident severity and the phase of flight in which these took place is described in Table.11.

Table 11. Relation between accident severity and phase of flight.

| <b>Phase of flight</b> | <b>Count</b> | <b>Minor<br/>(NACA I, II)</b> | <b>Major<br/>(NACA</b> | <b>Fatal<br/>(NACA VII)</b> |
|------------------------|--------------|-------------------------------|------------------------|-----------------------------|
|------------------------|--------------|-------------------------------|------------------------|-----------------------------|

|                       |    |       | III,IV,V,VI) |       |
|-----------------------|----|-------|--------------|-------|
| <b>takeoff</b>        | 70 | 64,3% | 28,6%        | 7,1%  |
| <b>cruise</b>         | 37 | 54,0% | 21,7%        | 24,3% |
| <b>other</b>          | 16 | 56,3% | 18,8%        | 25,0% |
| <b>approach</b>       | 15 | 46,6% | 40,0%        | 13,3% |
| <b>landing</b>        | 15 | 73,3% | 26,7%        | 0,0%  |
| <b>not applicable</b> | 13 | 46,2% | 30,8%        | 23,1% |
| <b>inflation</b>      | 11 | 54,5% | 45,5%        | 0,0%  |
| <b>runup</b>          | 10 | 20,0% | 80,0%        | 0,0%  |
| <b>after landing</b>  | 2  | 50,0% | 50,0%        | 0,0%  |

The relationship between accident severity and accident dynamic is detailed in table 12.

**Table 12. Relationship between accident severity and accident dynamic.**

| Type of incident                                    | count | minor (NACA I, II) | major (NACA III,IV,V,VI) | fatal (NACA VII) |
|-----------------------------------------------------|-------|--------------------|--------------------------|------------------|
| <b>collision with terrain/obstruction on ground</b> | 48    | 62,5%              | 18,8%                    | 18,8%            |
| <b>body contact with spinning prop</b>              | 36    | 44,4%              | 55,6%                    | 0,0%             |
| <b>hard landing</b>                                 | 27    | 74,1%              | 22,2%                    | 3,7%             |
| <b>fall</b>                                         | 22    | 54,5%              | 40,9%                    | 4,5%             |
| <b>wing malfunction or deflation</b>                | 16    | 31,2%              | 56,2%                    | 12,5%            |
| <b>handling</b>                                     | 13    | 53,8%              | 23,1%                    | 23,1%            |
| <b>water immersion</b>                              | 7     | 14,3%              | 14,3%                    | 71,4%            |
| <b>powerplant equipment malfunction</b>             | 6     | 100,0%             | 0,0%                     | 0,0%             |
| <b>other</b>                                        | 5     | 80,0%              | 0,0%                     | 20,0%            |
| <b>collision with other aircrafts/ultralight</b>    | 5     | 40,0%              | 40,0%                    | 20,0%            |
| <b>line tangle/damage</b>                           | 4     | 100,0%             | 0,0%                     | 0,0%             |

The statistical correlation between injury severity and type of incident (chi-square,  $p < 0.001$ ; confidence 95%) is shown in Fig. 3. The correlation between accident severity and pilot rating is scarcely significant (chi-square,  $p=0.044$ ; confidence 95%).

The data on the collateral damage from the various accidents reveals that in addition to the 383 pilots directly involved, seven bystanders and sixteen pilots of other aircraft involved in



collisions were also injured, for a total of 406 persons. The data was insufficient to precisely classify the severity of the injuries suffered by these persons. No injuries were sustained in thirteen cases.

A paramotor instructor was struck on the right hand by a pilot's propellor, with lesion of the ulnar artery and various fractures.

A bystander was struck on the right foot, with the amputation of three toes and injury to the remaining two. A spectator struck by the propellor of a PPG sustained severe facial injuries and another sustained minor injuries to the eye area.

Another bystander suffered amputation of the last three fingers of his left hand after being struck by a paramotor propellor.

A bystander was hit during a hard landing, suffering a minor injury to the forearm.

A power-paraglider pilot was struck by a PPG which was taking off, with the loss of a tooth, and two passengers of a hot air balloon hit during flight by a PPG sustained unknown but minor injuries, as did a power paraglider pilot hit by another PPG.

### Discussion

A careful review of the literature indicates that this is the first study of PPG accidents.

In 2007 it was estimated that the sport was practised only in the United States, by just 3000 persons [2].

It would seem to be a prevalently male sport, judging from the clear prevalence of male compared to female members of the association(USPPA) (table 13), a fact also reflected in the low number of women involved in the accidents examined in our study.

**Table 13. No. USPPA members/year**

| Year | Members | F  | M   |
|------|---------|----|-----|
| 2009 | 458     | 10 | 448 |
| 2010 | 521     | 10 | 511 |
| 2011 | 506     | 8  | 506 |
| 2012 | 608     | 17 | 591 |
| 2013 | 672     | 18 | 654 |

No statistically significant correlation was found in our sample between accident severity and pilot rating (chi-square,  $p=0.044$ ).

The majority of the accidents in our study (70.5 %) occurred while flying over level ground. As opposed to P, which is practised over hilly or mountain areas because it requires a descent in

1 order to take off, the paramotor pilot can take off on level ground thanks to the thrust of the motor.  
2  
3 It is safer to fly over level ground because there are fewer obstacles, the thermals are not too strong  
4  
5 and winds are generally steadier.

6  
7 Furthermore PPG differs from P in that the thrust of the motor allows the paramotor pilot to take off  
8  
9 and fly without the need for strong winds or thermals, therefore in safer and more stable weather  
10  
11 conditions.

12 Indeed, power-paragliders[2] widely consider their sport to be much safer than paragliding.

13 The motor makes it possible to fly frequently and in a much wider variety of weather conditions, so  
14  
15 pilots are less inclined to risk flying in extreme and hazardous conditions.

16  
17 In our study, the weather conditions were a main or contributing cause of accidents in 9.6%  
18  
19 of cases: weather conditions alone were the cause in 5.7% of cases, while the weather conditions  
20  
21 contributed to the accident together with pilot error in 4.4% of accidents. This figure is much lower  
22  
23 than that reported in paragliding by Zeller[3], who cite adverse weather conditions as a cause in  
24  
25 19% of paragliding accidents.

26 Nevertheless, our study clearly shows that use of a motor has an enormous influence on accident  
27  
28 dynamics. It can itself be the cause of accidents, it can be an important aggravating factor in the  
29  
30 case of an accident, or be the direct cause of injuries.

31  
32 Our study data showed that the majority of accidents occurred during takeoff (32.9%, or  
33  
34 43% if we include those during run-up and inflation, phases which can be considered an integral  
35  
36 part of takeoff with a paramotor), while in paragliding, the most dangerous phase of the flight is  
37  
38 landing[2, 3].

39 This can be explained by the fact that takeoff with a PPG requires a delicate balance between the  
40  
41 thrust of the motor, the weight of the crew and the lift of the wing. Additionally, the takeoff from  
42  
43 level ground and the prevalently horizontal thrust of the motor results in the pilot moving away  
44  
45 from the ground slowly, as opposed to P, where the distance from the ground increases rapidly due  
46  
47 to taking off from a slope.

48 As a result, falling distance remains reduced for much longer during takeoff with a PPG than with a  
49  
50 P, limiting the possibility of adopting emergency manoeuvres and making use of an emergency  
51  
52 parachute impossible.

53 The use of a motor can be the direct cause of accidents distinctive to PPG: the two causes  
54  
55 listed as “fuel exhaustion” and “mechanical failure: power-plant/propeller” were responsible for  
56  
57 14% of accidents.

58 The motor may also aggravate the accident, mainly due to the energy it produces and transmits to  
59  
60 the crew, but also because of its weight. It is mounted on a special frame worn by the pilot: the  
overall weight of the equipment and accompanying power-plant vary between 20 and 40 kg. In the

case of collision, both of these factors synergise to make the impact more traumatic given that motor displacement varies between 80cc and 250cc and motor power varies between 11 to 22.5kW; motor thrust is highest during takeoff: the phase of flight when PPG accidents occur most frequently.

In certain reports it is explicitly mentioned that it was precisely the energy supplied to the motor which rendered the impact fatal.

Various reports also describe the perilousness of a state of mental confusion suffered by the pilot during the execution of acrobatic stunts. Steep spirals are extremely dangerous manoeuvres in PPG; the position of the crew and the centrifugal acceleration (increased by the thrust of the motor) hinder blood supply to the brain, with a high risk of suffering blackouts - or in any case a momentary state of mental confusion-at a time when the maximum level of attention is required.

In the case of immersion in water, the weight of the motor tends to drag the pilot rapidly under the surface, without giving him time to free himself from the equipment, making this type of accident particularly feared among paramotor pilots. In our study, this dynamic was responsible for 21.7 % of fatal accidents (71.4% of incidents involving water immersion were fatal: Fig. 3) and a serious (non-fatal) case of near-drowning. It is therefore inadvisable to paramotor over or near water; it is essential that pilots wishing to do so adopt the use of self-inflating and specially designed safety systems (Agama).

PPG differs from P[3, 4, 5, 6, 7] in that the upper limbs are more frequently affected (table 14), while spinal injuries are less frequent.

**Table 14. Distribution of the injuries sustained in the different body regions as per the studies on paragliding; modified from[4].**

| Study                           | Head   | Upper Limb | Lower Limb | Spine  |
|---------------------------------|--------|------------|------------|--------|
| Krüger-Franke et al. (1991) [5] | 6.80%  | 17.10%     | 31.50%     | 44.60% |
| Zeller et al. (1992)[3]         | 5.40%  | 17.30%     | 46.10%     | 31.10% |
| Fashing et al. (1997)[6]        | 16.30% | 14.40%     | 36.50%     | 32.70% |
| Rekand (2009)[7]                | 13.30% | 0.00%      | 26.70%     | 60.00% |

The different injury distribution may depend in part on the different flight dynamics and different distribution of the forces acting on the crew due to the thrust of the motor and the weight of the equipment.

The motor is undoubtedly the factor which distinguishes PPG from P in terms of injury type;

1 contact with the propellor caused 43 accidents (11.22%) in our study and was responsible for the  
2 majority of injuries to the upper limbs, in particular lesions to the hands, wrists, forearms, arms and  
3 shoulders, as well as all eleven fractures with loss of fingers cited in this study (Fig. 4, Fig. 5, Fig.  
4 6). Contact with incandescent motor parts was the cause of four cases of burns to the face, neck,  
5 back, shoulder, arm, elbow, forearm, calf, thigh and ankle, while two cases of generalised burns  
6 were the result of actual fires caused by combustion of the motor fuel. In another case, electrical  
7 burns to the chest and one arm were sustained following collision with high voltage power lines.  
8 Contact with power lines is an established cause of accidents in P also, while burns resulting from  
9 motor fuel combustion or contact with the motor are limited to PPG.

10 PPG is widely believed to be safer than P, and fatal events considered to be rarer than in  
11 P[2].

12 In our study, 6% of accidents were fatal (fatal accidents/no. Accidents: 23/383). This figure is not  
13 lower than the values cited in literature for P and hang-gliding (table 10) and is in any case  
14 comparable with the 6.1% of fatal paragliding accidents reported by Schulze (2002)[8] in a study  
15 very similar to ours, since it was conducted using the data from incident reports.

16 Considering the differences between PPG and P, future studies of this sport and related injuries  
17 should be conducted separately from P, in separate case studies.

18 Certain types of safety clothing and equipment can significantly reduce various risks specific to this  
19 sport. The use of protective gloves in particular can protect against hand injuries caused by contact  
20 with the spinning prop.

21 Since many prop strike injuries have been higher up the arm where gloves would not be effective,  
22 an even better solution could be to add the so called "safety ring" to the motor cage. The safety ring  
23 is an aluminum ring that mounts just forward of the radial arms with the same radius as the prop.  
24 The safety ring makes it difficult to an open human hand from going into the prop at full rated  
25 thrust and adds very little in terms of expense, and weight to the paramotor. Its use should be made  
26 obligatory, given that these injuries are often severe, in some cases involving amputation of the  
27 fingers.

28 Given the extreme danger of water immersion, it is essential that pilots equip  
29 themselves with an Agama when flying near water. As in paragliding, periodical checking and  
30 maintenance of equipment (the wing and lines in particular) is essential. Additionally, in PPG,  
31 careful inspection and maintenance of the motor is vital, given that its malfunctioning is a major  
32 cause of accidents.

## 33 **Conclusions**

34 This study reveals a pattern of accidents in PPG clearly different from that of P: PPG accidents are  
35 more common during takeoff; weather and wind conditions have a lesser influence in causing  
36

accidents, the energy from the motor and the weight of the equipment may aggravate accidents. The pattern of injuries sustained in this sport are distinctive: mostly involving the upper limbs, while those to the spine are less common. Finally, contrary to the belief held up to now by the experts of this sport[2], the number of fatal accidents/number of accidents is not lower than those which occur in P and in hang-gliding[5, 6, 8, 9](table 15).

**Table 15. Studies on Paragliding and Hang-gliding reporting fatal outcome after accidents.**

| Sport        | Study                           | No. fatalities | No. participants | % Fatal events |
|--------------|---------------------------------|----------------|------------------|----------------|
| Paragliding  | Krüger-Franke et al. (1991)[5]. | 2              | 218              | 0.91%          |
| Paragliding  | Schulze et al. (2002)[8].       | 25             | 409              | 6.10%          |
| Paragliding  | Fashing et al. (1997)[6]        | 0              | 70               | 0.00%          |
| Hang-gliding | Foray et al (1991)[9].          | 7              | 200              | 3.50%          |

For these reasons, PPG should be studied separately from P in distinct studies and case reports. Further studies will be useful to confirm the data from this study: we can nevertheless assert that safety equipment such as protective gloves, a safety ring or an Agama, and periodical checks of the motor can reduce certain risks specific to this sport.

#### **Contributorship Statement**

The study was conceived by Francesco Feletti and Jeff Goin.

Jeff Goin collected data.

Francesco Feletti carried out statistical analyses and wrote the draft of the manuscript. All authors contributed to critical revisions of the manuscript and approved the final version.

**Data sharing statement** No additional data are available.

**Competing interests** None.

#### **Funding statement**

The authors received no funding for this research

#### **REFERENCES**

[1] Rekan T. The epidemiology of injury in hang gliding and paragliding. *Med Sport Sci* 2012; 58: 44-56.

[2] Footflyer- The source for power paragliding information.  
[http://www.footflyer.com/Safety/Incidents/incidents\\_and\\_analysis.htm](http://www.footflyer.com/Safety/Incidents/incidents_and_analysis.htm) [Oct 2013]

[3] Zeller T, Billing A, Lob G. Injuries in paragliding. *Int Orthop*. 1992;16(3): 255-9.

1 [4] Rekand T The Epidemiology of injury in hang-gliding and paragliding. In Heggie TW, Caine DJ  
2 (eds): Epidemiology of Injury in Adventure and Extreme Sports. Med Sports Sci. Basel, Kager  
3 2012; 58: 44-56.

4  
5  
6 [5] Krüger-Franke M, Siebert CH, Pfürringer W. Paragliding injuries. Br J Sports Med 1991; 25(2):  
7 98-101.

8  
9  
10 [6] Fasching G, Schippinger G, Pretschner R. Paragliding accidents in remote areas. 1997  
11 Aug;8(3):129-33.

12  
13 [7] Rekand T, Schaanning EE, Varga V, et al. Spinal cord injuries among paragliders in Norway.  
14 Spinal Cord. 2008 Jun;46(6): 412-16.

15  
16 [8] Schulze W, Richter J, Schulze B, et al. Injury prophylaxis in paragliding. Br J Sports Med 2002;  
17 36: 365-69.

18  
19 [9] Foray J, Abrassart S, Femmy T, et al. Hang-gliding accidents in high mountains. Apropos of 200  
20 cases. Chirurgie 1991; 117(8): 613-7.

21  
22 [10] Fuller CW, Ekstrand J, Junge A, et al. Consensus statement on injury definitions and data  
23 collection procedures in studies of football (soccer) injuries. Clin J Sport Med. 2006; 16(2): 83-92.

24  
25 [11] Fuller CW, Ekstrand J, Junge A, et al. Consensus statement on injury definitions and data  
26 collection procedures in studies of football (soccer) injuries. Scand J Med Sci Sports 2006;16 (2)  
27 83-92.

28  
29 [12] Fuller CW, Ekstrand J, Junge A, et al. Consensus statement on injury definitions and data  
30 collection procedures in studies of football (soccer) injuries. Clin J Sport Med. 2006; 40(3): 193-  
31 201.

### 32 33 34 35 **FIGURE LEGENDS**

36 Fig. 1: Paramotor in flight

37  
38 Fig. 2. Severity of injuries summary

39  
40 Fig. 3: Severity of injuries by type of accident

41  
42 Fig. 4: Serious hand lesions caused by contact with the motor prop: these injuries are specific to  
43 powered paragliding.

44  
45 Fig. 5: Serious hand lesions caused by contact with the motor prop.

46  
47 Fig. 6: Lesion of a finger caused by contact with the motor prop.





1  
2  
3  
4  
5  
6  
7  
8  
9  
10  
11  
12  
13  
14  
15  
16  
17  
18  
19  
20  
21  
22  
23  
24  
25  
26  
27  
28  
29  
30  
31  
32  
33  
34  
35  
36  
37  
38  
39  
40  
41  
42  
43  
44  
45  
46  
47  
48  
49  
50  
51  
52  
53  
54  
55  
56  
57  
58  
59  
60

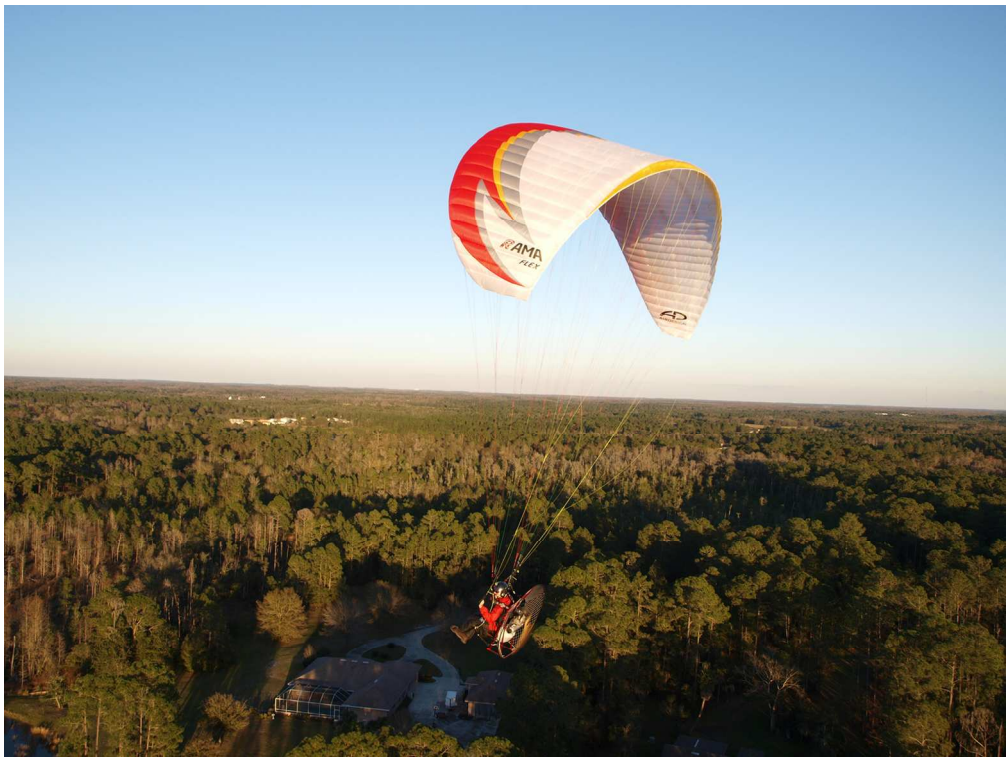

Figure 1: Paramotor in flight  
134x101mm (300 x 300 DPI)

ew only



1  
2  
3  
4  
5  
6  
7  
8  
9  
10  
11  
12  
13  
14  
15  
16  
17  
18  
19  
20  
21  
22  
23  
24  
25  
26  
27  
28  
29  
30  
31  
32  
33  
34  
35  
36  
37  
38  
39  
40  
41  
42  
43  
44  
45  
46  
47  
48  
49  
50  
51  
52  
53  
54  
55  
56  
57  
58  
59  
60

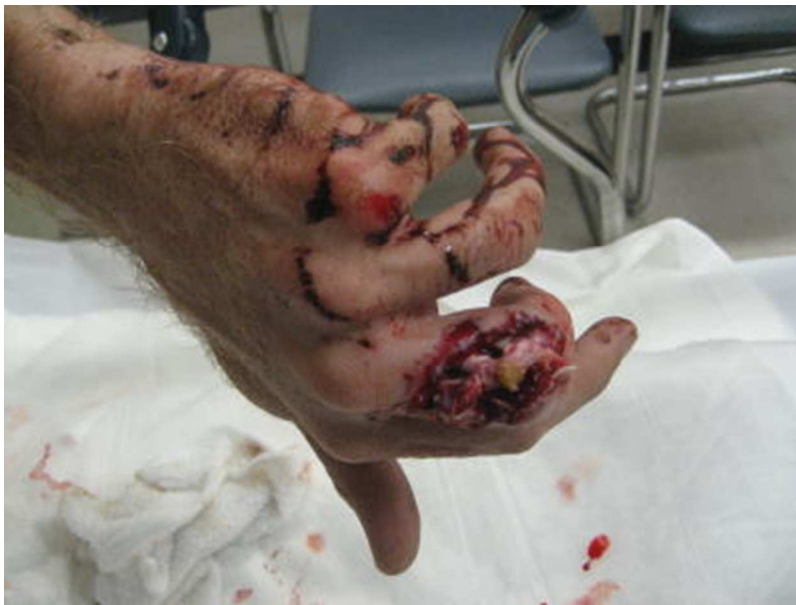

56x42mm (180 x 180 DPI)

review only

1  
2  
3  
4  
5  
6  
7  
8  
9  
10  
11  
12  
13  
14  
15  
16  
17  
18  
19  
20  
21  
22  
23  
24  
25  
26  
27  
28  
29  
30  
31  
32  
33  
34  
35  
36  
37  
38  
39  
40  
41  
42  
43  
44  
45  
46  
47  
48  
49  
50  
51  
52  
53  
54  
55  
56  
57  
58  
59  
60

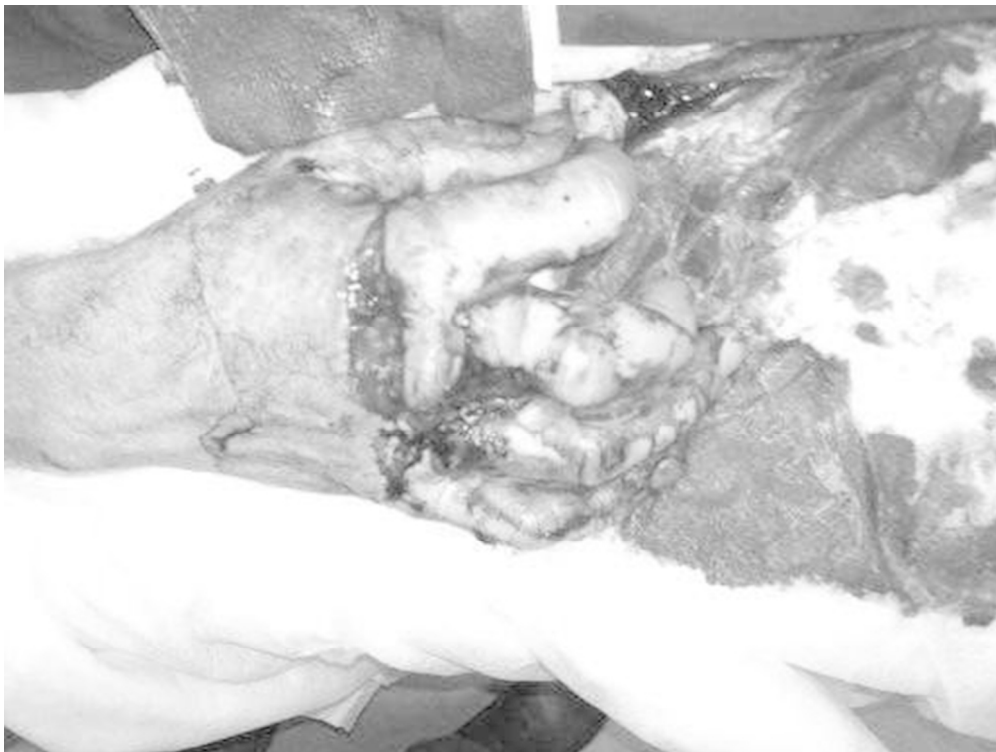

90x67mm (300 x 300 DPI)

Review only

1  
2  
3  
4  
5  
6  
7  
8  
9  
10  
11  
12  
13  
14  
15  
16  
17  
18  
19  
20  
21  
22  
23  
24  
25  
26  
27  
28  
29  
30  
31  
32  
33  
34  
35  
36  
37  
38  
39  
40  
41  
42  
43  
44  
45  
46  
47  
48  
49  
50  
51  
52  
53  
54  
55  
56  
57  
58  
59  
60

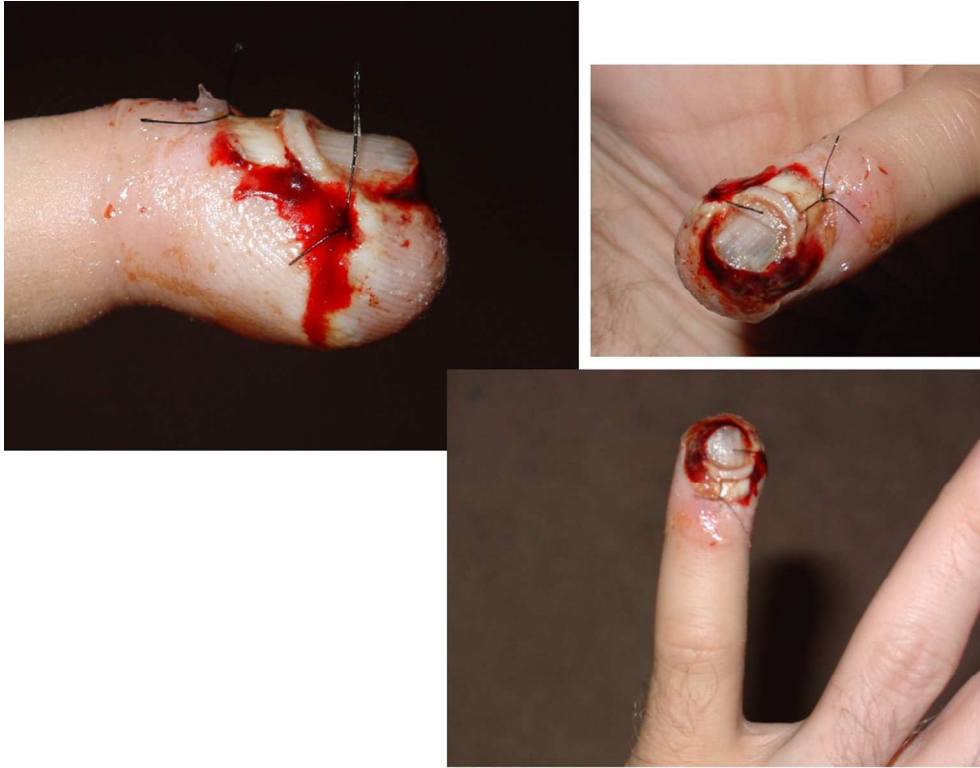

152x117mm (200 x 200 DPI)

ew only

## STROBE Statement—checklist of items that should be included in reports of observational studies

|                              | Item No | Recommendation                                                                                                                                                                                                                                                                                                                                                                                                                                                                                                                                                                                                                                                                                   |
|------------------------------|---------|--------------------------------------------------------------------------------------------------------------------------------------------------------------------------------------------------------------------------------------------------------------------------------------------------------------------------------------------------------------------------------------------------------------------------------------------------------------------------------------------------------------------------------------------------------------------------------------------------------------------------------------------------------------------------------------------------|
| <b>Title and abstract</b>    | 1       | (a) Indicate the study's design with a commonly used term in the title or the abstract<br>(b) Provide in the abstract an informative and balanced summary of what was done and what was found                                                                                                                                                                                                                                                                                                                                                                                                                                                                                                    |
| <b>Yes</b>                   |         |                                                                                                                                                                                                                                                                                                                                                                                                                                                                                                                                                                                                                                                                                                  |
| <b>Introduction</b>          |         |                                                                                                                                                                                                                                                                                                                                                                                                                                                                                                                                                                                                                                                                                                  |
| Background/rationale         | 2       | Explain the scientific background and rationale for the investigation being reported                                                                                                                                                                                                                                                                                                                                                                                                                                                                                                                                                                                                             |
| <b>Yes</b>                   |         |                                                                                                                                                                                                                                                                                                                                                                                                                                                                                                                                                                                                                                                                                                  |
| Objectives                   | 3       | State specific objectives, including any prespecified hypotheses                                                                                                                                                                                                                                                                                                                                                                                                                                                                                                                                                                                                                                 |
| <b>Yes</b>                   |         |                                                                                                                                                                                                                                                                                                                                                                                                                                                                                                                                                                                                                                                                                                  |
| <b>Methods</b>               |         |                                                                                                                                                                                                                                                                                                                                                                                                                                                                                                                                                                                                                                                                                                  |
| Study design                 | 4       | Present key elements of study design early in the paper                                                                                                                                                                                                                                                                                                                                                                                                                                                                                                                                                                                                                                          |
| <b>Yes</b>                   |         |                                                                                                                                                                                                                                                                                                                                                                                                                                                                                                                                                                                                                                                                                                  |
| Setting                      | 5       | Describe the setting, locations, and relevant dates, including periods of recruitment, exposure, follow-up, and data collection                                                                                                                                                                                                                                                                                                                                                                                                                                                                                                                                                                  |
| <b>Yes</b>                   |         |                                                                                                                                                                                                                                                                                                                                                                                                                                                                                                                                                                                                                                                                                                  |
| Participants                 | 6       | (a) <i>Cohort study</i> —Give the eligibility criteria, and the sources and methods of selection of participants. Describe methods of follow-up<br><i>Case-control study</i> —Give the eligibility criteria, and the sources and methods of case ascertainment and control selection. Give the rationale for the choice of cases and controls<br><i>Cross-sectional study</i> —Give the eligibility criteria, and the sources and methods of selection of participants<br>(b) <i>Cohort study</i> —For matched studies, give matching criteria and number of exposed and unexposed<br><i>Case-control study</i> —For matched studies, give matching criteria and the number of controls per case |
| <b>Yes</b>                   |         |                                                                                                                                                                                                                                                                                                                                                                                                                                                                                                                                                                                                                                                                                                  |
| Variables                    | 7       | Clearly define all outcomes, exposures, predictors, potential confounders, and effect modifiers. Give diagnostic criteria, if applicable                                                                                                                                                                                                                                                                                                                                                                                                                                                                                                                                                         |
| <b>Yes</b>                   |         |                                                                                                                                                                                                                                                                                                                                                                                                                                                                                                                                                                                                                                                                                                  |
| Data sources/<br>measurement | 8*      | For each variable of interest, give sources of data and details of methods of assessment (measurement). Describe comparability of assessment methods if there is more than one group                                                                                                                                                                                                                                                                                                                                                                                                                                                                                                             |
| <b>Yes</b>                   |         |                                                                                                                                                                                                                                                                                                                                                                                                                                                                                                                                                                                                                                                                                                  |
| Bias                         | 9       | Describe any efforts to address potential sources of bias                                                                                                                                                                                                                                                                                                                                                                                                                                                                                                                                                                                                                                        |
| <b>Yes</b>                   |         |                                                                                                                                                                                                                                                                                                                                                                                                                                                                                                                                                                                                                                                                                                  |
| Study size                   | 10      | Explain how the study size was arrived at                                                                                                                                                                                                                                                                                                                                                                                                                                                                                                                                                                                                                                                        |
| <b>Yes</b>                   |         |                                                                                                                                                                                                                                                                                                                                                                                                                                                                                                                                                                                                                                                                                                  |
| Quantitative variables       | 11      | Explain how quantitative variables were handled in the analyses. If applicable, describe which groupings were chosen and why                                                                                                                                                                                                                                                                                                                                                                                                                                                                                                                                                                     |
| <b>Yes</b>                   |         |                                                                                                                                                                                                                                                                                                                                                                                                                                                                                                                                                                                                                                                                                                  |
| Statistical methods          | 12      | (a) Describe all statistical methods, including those used to control for confounding<br>(b) Describe any methods used to examine subgroups and interactions<br>(c) Explain how missing data were addressed<br>(d) <i>Cohort study</i> —If applicable, explain how loss to follow-up was addressed<br><i>Case-control study</i> —If applicable, explain how matching of cases and controls was addressed<br><i>Cross-sectional study</i> —If applicable, describe analytical methods taking account of sampling strategy<br>(e) Describe any sensitivity analyses                                                                                                                                |
| <b>Yes</b>                   |         |                                                                                                                                                                                                                                                                                                                                                                                                                                                                                                                                                                                                                                                                                                  |

Continued on next page

For peer review only

1  
2  
3  
4  
5  
6  
7  
8  
9  
10  
11  
12  
13  
14  
15  
16  
17  
18  
19  
20  
21  
22  
23  
24  
25  
26  
27  
28  
29  
30  
31  
32  
33  
34  
35  
36  
37  
38  
39  
40  
41  
42  
43  
44  
45  
46  
47  
48  
49  
50  
51  
52  
53  
54  
55  
56  
57  
58  
59  
60

**Results**

|                                |     |                                                                                                                                                                                                                                                                                                                                                                                                               |
|--------------------------------|-----|---------------------------------------------------------------------------------------------------------------------------------------------------------------------------------------------------------------------------------------------------------------------------------------------------------------------------------------------------------------------------------------------------------------|
| Participants<br><b>Yes</b>     | 13* | (a) Report numbers of individuals at each stage of study—eg numbers potentially eligible, examined for eligibility, confirmed eligible, included in the study, completing follow-up, and analysed<br>(b) Give reasons for non-participation at each stage<br>(c) Consider use of a flow diagram                                                                                                               |
| Descriptive data<br><b>Yes</b> | 14* | (a) Give characteristics of study participants (eg demographic, clinical, social) and information on exposures and potential confounders<br>(b) Indicate number of participants with missing data for each variable of interest<br>(c) <i>Cohort study</i> —Summarise follow-up time (eg, average and total amount)                                                                                           |
| Outcome data<br><b>Yes</b>     | 15* | <i>Cohort study</i> —Report numbers of outcome events or summary measures over time<br><i>Case-control study</i> —Report numbers in each exposure category, or summary measures of exposure<br><i>Cross-sectional study</i> —Report numbers of outcome events or summary measures                                                                                                                             |
| Main results<br><b>Yes</b>     | 16  | (a) Give unadjusted estimates and, if applicable, confounder-adjusted estimates and their precision (eg, 95% confidence interval). Make clear which confounders were adjusted for and why they were included<br>(b) Report category boundaries when continuous variables were categorized<br>(c) If relevant, consider translating estimates of relative risk into absolute risk for a meaningful time period |
| Other analyses<br><b>Yes</b>   | 17  | Report other analyses done—eg analyses of subgroups and interactions, and sensitivity analyses                                                                                                                                                                                                                                                                                                                |

**Discussion**

|                                |    |                                                                                                                                                                            |
|--------------------------------|----|----------------------------------------------------------------------------------------------------------------------------------------------------------------------------|
| Key results<br><b>Yes</b>      | 18 | Summarise key results with reference to study objectives                                                                                                                   |
| Limitations<br><b>Yes</b>      | 19 | Discuss limitations of the study, taking into account sources of potential bias or imprecision. Discuss both direction and magnitude of any potential bias                 |
| Interpretation<br><b>Yes</b>   | 20 | Give a cautious overall interpretation of results considering objectives, limitations, multiplicity of analyses, results from similar studies, and other relevant evidence |
| Generalisability<br><b>Yes</b> | 21 | Discuss the generalisability (external validity) of the study results                                                                                                      |

**Other information**

|                       |    |                                                                                                                                                               |
|-----------------------|----|---------------------------------------------------------------------------------------------------------------------------------------------------------------|
| Funding<br><b>Yes</b> | 22 | Give the source of funding and the role of the funders for the present study and, if applicable, for the original study on which the present article is based |
|-----------------------|----|---------------------------------------------------------------------------------------------------------------------------------------------------------------|

\*Give information separately for cases and controls in case-control studies and, if applicable, for exposed and unexposed groups in cohort and cross-sectional studies.

**Note:** An Explanation and Elaboration article discusses each checklist item and gives methodological background and published examples of transparent reporting. The STROBE checklist is best used in conjunction with this article (freely available on the Web sites of PLoS Medicine at <http://www.plosmedicine.org/>, Annals of Internal Medicine at <http://www.annals.org/>, and Epidemiology at <http://www.epidem.com/>). Information on the STROBE Initiative is available at [www.strobe-statement.org](http://www.strobe-statement.org).

1  
2  
3  
4  
5  
6  
7  
8  
9  
10  
11  
12  
13  
14  
15  
16  
17  
18  
19  
20  
21  
22  
23  
24  
25  
26  
27  
28  
29  
30  
31  
32  
33  
34  
35  
36  
37  
38  
39  
40  
41  
42  
43  
44  
45  
46  
47  
48  
49  
50  
51  
52  
53  
54  
55  
56  
57  
58  
59  
60

### SEVERITY OF INJURIES BY TYPE OF ACCIDENT

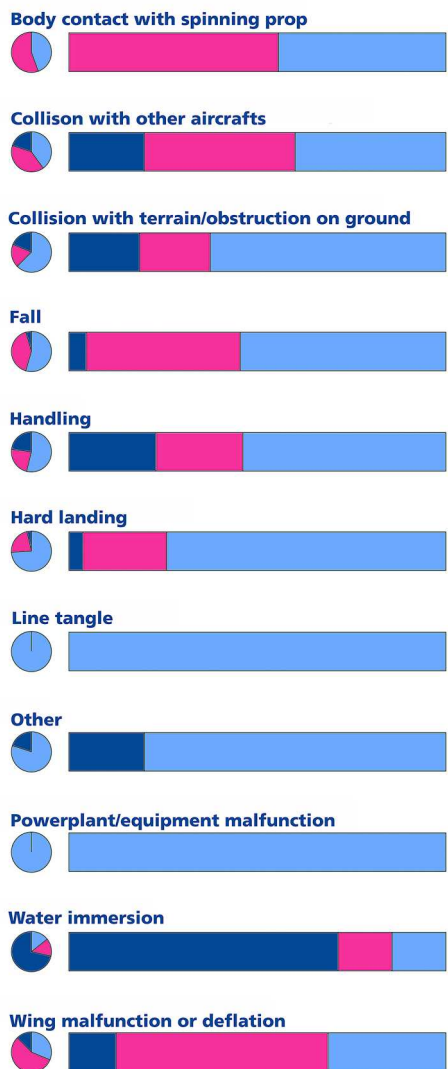

90x218mm (300 x 300 DPI)

1  
2  
3  
4  
5  
6  
7  
8  
9  
10  
11  
12  
13  
14  
15  
16  
17  
18  
19  
20  
21  
22  
23  
24  
25  
26  
27  
28  
29  
30  
31  
32  
33  
34  
35  
36  
37  
38  
39  
40  
41  
42  
43  
44  
45  
46  
47  
48  
49  
50  
51  
52  
53  
54  
55  
56  
57  
58  
59  
60

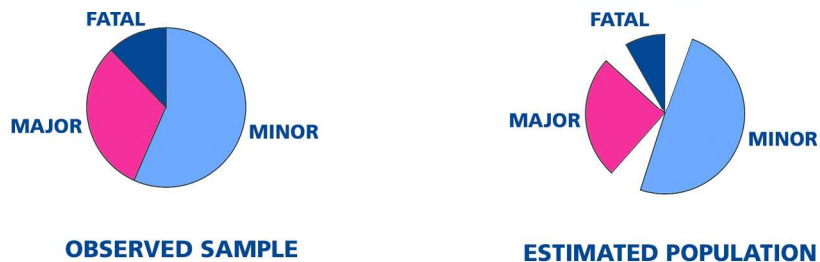

180x70mm (300 x 300 DPI)

Peer review only



# BMJ Open

## Accidents and injuries related to powered paragliding: a cross sectional study

|                                 |                                                                                                                                                                                                                                                                                          |
|---------------------------------|------------------------------------------------------------------------------------------------------------------------------------------------------------------------------------------------------------------------------------------------------------------------------------------|
| Journal:                        | <i>BMJ Open</i>                                                                                                                                                                                                                                                                          |
| Manuscript ID:                  | bmjopen-2014-005508.R1                                                                                                                                                                                                                                                                   |
| Article Type:                   | Research                                                                                                                                                                                                                                                                                 |
| Date Submitted by the Author:   | 26-Jun-2014                                                                                                                                                                                                                                                                              |
| Complete List of Authors:       | Feletti, Francesco; Azienda Unità Sanitaria Locale della Romagna, Presidio Ospedaliero di Ravenna, Ospedale S. Maria delle Croci, U.O.Radiologia; ExtremeSportMed, Goin, Jeff; B.S. Aeronautical Science, Embry Riddle Aeronautical University , ; U.S. Powered Paragliding Association, |
| <b>Primary Subject Heading</b>: | Sports and exercise medicine                                                                                                                                                                                                                                                             |
| Secondary Subject Heading:      | Sports and exercise medicine, Emergency medicine, General practice / Family practice, Epidemiology, Occupational and environmental medicine                                                                                                                                              |
| Keywords:                       | SPORTS MEDICINE, Orthopaedic & trauma surgery < SURGERY, Hand & wrist < ORTHOPAEDIC & TRAUMA SURGERY, Adult intensive & critical care < ANAESTHETICS, FORENSIC MEDICINE                                                                                                                  |
|                                 |                                                                                                                                                                                                                                                                                          |

SCHOLARONE™  
Manuscripts

Title: **Accidents and injuries related to powered paragliding: a cross sectional study**

Keywords

**Extreme Sports, Sporting injuries, Protective clothing, Motor sports, Injury prevention**

**Corresponding Author**

Francesco Feletti, MD,

*Presidio Ospedaliero di Ravenna, Ausl della Romagna, U.O.Radiologia;*

*ExtremeSportMed*

*Imola - Bologna, Italy;*

*e-mail: [feletti@extremesportmed.net](mailto:feletti@extremesportmed.net)*

*Phone: +39 393 123 0 456*

*Postal Address: Viale Amendola 91 40026 Imola (Bologna)*

**Authors**

**Francesco Feletti, MD,**

*Ospedale di Ravenna S. Maria delle Croci - AUSL della Romagna, U.O.Radiologia*

*Ravenna, Italy;*

*ExtremeSportMed*

*Imola - Bologna, Italy;*

**Jeff Goin, Capt,**

*B.S. Aeronautical Science, Embry Riddle Aeronautical University*

## ABSTRACT

**Objectives** - Powered paragliding is a clearly distinct sport from paragliding, mainly because of the use of an engine. We supposed that the differences between these two sports result in different types of injuries.

**Setting** - To test this hypothesis, we analysed 384 incident reports gathered by the United States Powered Paragliding Association from 1995 to 2012.

The majority of the incidents described occurred in the US, while 26 incidents occurred elsewhere: Canada (8), Mexico (5), Panama (1), China (1), Japan (1), Malaysia (1), Indonesia (Java)(1), Europe (8): of which Spain (1), Belgium (1), United Kingdom (3), Italy (1), Romania (1), Unknown (1).

**Outcome:** to identify the most affected body area and the most common type of injury sustained in PPG, and to highlight any differences with respect to paragliding.

**Results** - The most affected body areas in PPG were the upper limbs (44.5%) followed by the lower limbs (32 %), the back (9,8%), the head (7%), the pelvis (3,1), the chest (2,7%) and the abdomen (0,7%) ( $p < 0,001$ ).

The engine caused 43 accidents (11.22%) in our study and was responsible for the majority of injuries to the upper limbs.

The number of fatal accidents is not lower than those which occur in paragliding and in hang-gliding.

**Conclusions** - **To help to prevent the specific injuries of powered paragliding, the most appropriate equipment should be identified.**

The results of this study also suggest that in future this sport should be studied using studies and case reports distinct from those of paragliding.

## Strengths and limitations of this study

This is the first study in literature on powered paragliding.

We analyzed a large amount of data (384 incident reports) collected from 1995 to 2012.

means of long lines. It is a completely different sport from paragliding because the equipment used includes an engine worn on the back and held in place by a harness (Fig. 1).

In contrast to paragliding, which is practised over hilly or mountain areas, because it requires a descent in order to take off, the PPG can take off from level ground thanks to the power of the engine.

It is safer to fly over level ground because there are fewer obstacles, the thermals are not too strong and winds are generally steady.

Furthermore PPG differs from paragliding because the thrust of the engine allows the paramotor pilot to take off and fly without the need for strong winds or thermals, therefore in safer and more stable weather conditions.

Compared to other aerial sports, paragliding nevertheless remains the most similar to PPG: both require the pilot to keep the wing inflated by means of his own weight and skill.

PPG was invented in the 1980's and rapidly gained popularity, so much so that various national and international competitions have been held throughout the world over the last few years.

In 2007 it was estimated that the sport was practised only in the United States, by just 3000 persons [1].

As PPG has grown in popularity, the number of accidents associated with this sport has inevitably increased. A knowledge of accident dynamics, the type of injuries sustained and the body area affected is of vital importance for sports medicine to provide an insight into the types of conduct, protective clothing and safety systems to adopt to improve the safety of any given sport.

A careful examination of the literature leads us to conclude that there are no existing studies of this sport in medical literature except from a case we have previously reported [2]: in a recent literature review [3], this sport is only mentioned among the variety of paragliding, to which it is usually grouped.

Given that the way of flying a paramotor is very different to that of a paraglider, we supposed that the accident and injury types differ greatly between the two sports as a result.

The aim of this study is to clarify the dynamics of paramotoring accidents, the conditions in which these occur, the type of injuries sustained, and to highlight any differences with respect to paragliding.

The collection of data was primarily thought for accidents in the U.S. but since USPPA is very popular among powered paragliders worldwide, also accidents from other countries were reported. The forms submitted had been completed by the pilot involved, a witness who had seen the accident, or by the Association itself based on the information gathered.

The form included: drop-down menu lists, checklists and text fields and consisted of five sections:

1-General information (date, time and place of the accident);

2-Pilot information, including demographic information and details of the pilot's PPG experience;

3-Details of the accident, including a description of the type of accident, the main cause, weather conditions at the time, characteristics of the takeoff and landing area, and details of the pilot's clothing and equipment;

4-Injury information: including the body parts affected, the seriousness of the injury, any medical assistance and possible collateral damage to people or things.

5-Narrative: an extended description of the event and its consequences.

In the form, a specific question on the quality of injuries was missing, but a careful reading of the narrative section allowed to obtain these informations from almost all the forms.

When these data were missing they were named as 'unknown' in the results.

The data published by the USPPA were public and anonymous; its use for study and publication purposes was authorised beforehand by the USPPA.

The data were analysed using descriptive statistics, using the software Wizard Pro 1.3.27 and the *chi-square* test.

The following definition of injury has been adopted: "any physical complaint sustained by an athlete that results from training or competition, irrespective of the need for medical attention or time lost from sports activities"[5-7].

Each incident report was also given a NACA(National Advisory Committee of Aeronautics) Score: a 7-point system (table 1) developed to assess the severity of injuries and diseases sustained or developed during aviation accidents. Based on the available data, nevertheless, it was not possible to distinguish between classes V and VI in all cases.

1  
2  
3  
4  
5  
6  
7  
8  
9  
10  
11  
12  
13  
14  
15  
16  
17  
18  
19  
20  
21  
22  
23  
24  
25  
26  
27  
28  
29  
30  
31  
32  
33  
34  
35  
36  
37  
38  
39  
40  
41  
42  
43  
44  
45  
46  
47  
48  
49

| NACA 0   | BMJ Open                                                                                                                                                                      |                                                                                           |
|----------|-------------------------------------------------------------------------------------------------------------------------------------------------------------------------------|-------------------------------------------------------------------------------------------|
| NACA I   | Slight injury or illness. No acute medical intervention necessary.                                                                                                            | E.g. slight abrasion.                                                                     |
| NACA II  | Slight to moderately heavy injury or illness. Further diagnostic examination needed or outpatient medical investigation, but usually no emergency medical measures necessary. | E.g. fracture of a finger bone, moderate cuts, dehydration.                               |
| NACA III | Moderate to heavy but not life-threatening disorder. Frequently emergency medical measures on the site                                                                        | E.g. femur fracture, milder stroke, smoke inhalation                                      |
| NACA IV  | Heavy injury or illness where rapid development into a life threatening condition can not be excluded. Emergency medical care is required                                     | E.g. vertebral injury with neurological deficit, severe asthma attack; drug poisoning     |
| NACA V   | Acute vital (life threatening) danger                                                                                                                                         | E.g. third grade skull or brain trauma, severe heart attack, significant opioid poisoning |
| NACA VI  | Breath and/or cycle stop and/or reanimation                                                                                                                                   | ---                                                                                       |
| NACA VII | Death                                                                                                                                                                         | ---                                                                                       |

Both categories cover conditions posing an immediate threat to life and requiring immediate emergency medical assistance: therefore we decided to consider them as a single category.

We subsequently focused on the accidents resulting in injuries (disregarding those with a NACA score of 0), and divided these into 3 classes based on the severity of the injuries:

- 1-minor (NACA I, II), usually not requiring emergency medical measures
- 2-major (NACA III, IV, V, VI), almost always requiring emergency medical measures
- 3-fatal (NACA VII).

We associated the incidents thus classified with the accident dynamics cited in the incident reports and with the phase of flight in which the accidents occurred. We also explored the correlation

between injury severity and pilot rating, and between injury severity and accident dynamics

the accidents examined in our study.

One incident report had been submitted twice, therefore one copy was retained and the other was excluded.

The majority of the incidents described occurred in the US, while 26 incidents occurred elsewhere: Canada (8), Mexico (5), Panama (1), China (1), Japan (1), Malaysia (1), Indonesia (Java)(1), Europe (8): of which Spain (1), Belgium (1), United Kingdom (3), Italy (1), Romania (1), Unknown (1). Only three incidents involved a female pilot.

Pilot injuries were classified according to NACA category (table 2): 23 incidents were fatal.

**Table 2. NACA Score of PPG accidents in this study**

| NACA Category | Pilots | %    |
|---------------|--------|------|
| <b>0</b>      | 194    | 50,6 |
| <b>I</b>      | 59     | 15,4 |
| <b>II</b>     | 48     | 12,5 |
| <b>III</b>    | 43     | 11,2 |
| <b>IV</b>     | 11     | 2,9  |
| <b>V + VI</b> | 5      | 1,3  |
| <b>VII</b>    | 23     | 6    |

The following factors were taken into consideration: the phase of flight during which the accident took place (table 3), the primary cause (table 4) and the type of accident (table 5).

As for the experience of the pilots involved, pilot rating was distributed as follows: 25,5% PPG2, 13,5% PPG1, 15,1% PPG3, 9,1% Instructor, 12,8% None, 11,7% Not applicable, 6% Unknown, 1,8% Other.

No statistically significant correlation was found in our sample between accident severity and pilot rating (chi-square,  $p=0.044$ ).

With reference to the place where the accidents occurred, these are the following data: 70,5% flat terrain, 1,4% not applicable, 8,8% hilly terrain, 2,6% water, 2,6% mountainous terrain, 2,6% unknown data, 1,3% other.

|                                                |    |          |       |
|------------------------------------------------|----|----------|-------|
| Landing (including approach and after landing) | 55 | BMJ Open | 14,3% |
| Not Applicable/Other                           | 56 |          | 14,6% |

Table 4. Primary cause of accidents

| Primary cause                                        | Tot. | %    |
|------------------------------------------------------|------|------|
| Pilot Errors (only)                                  | 205  | 53,5 |
| Mechanical Failure (including fuel exhaustion)       | 67   | 17,5 |
| Pilot Error & Weather                                | 17   | 4,4  |
| Pilot Error & Mechanical Failure                     | 17   | 4,4  |
| Weather (Gust, Thermal, Rain, Wind increase, etc..). | 22   | 5,7  |
| Not Applicable/unknown                               | 24   | 4,4  |
| Other (including wake Tight takeoff/LZ Area)         | 31   | 1,8  |

Table 5. Type of accidents

| Type                                         | Tot. | %    |
|----------------------------------------------|------|------|
| Collision with Terrain/Obstruction on Ground | 76   | 19,8 |
| Powerplant Equipment Malfunction             | 58   | 15,1 |
| Body contact with spinning prop              | 43   | 11,2 |
| Hard Landing                                 | 40   | 10,4 |
| Fall                                         | 37   | 9,7  |
| Wing Malfunction or Deflation                | 35   | 9,1  |
| Other                                        | 29   | 7,5  |
| Handling                                     | 20   | 5,2  |
| Line Tangle/Damage                           | 15   | 3,9  |



single injury, 39 (10.2 %) caused multiple injuries, while five (1.3%) caused systemic medical conditions; in particular two pilots suffered generalised burnings, two sustained severe polytrauma and one drowning.

To identify the most affected body areas and therefore most critical areas for the development of protective clothing, we calculated the number of injuries sustained in each body area (table 6). On a total of 256 injuries, the most affected body areas were the upper limbs (44.5%) followed by the lower limbs (32 %) and the back (9,7 %).

**Table 6. Distribution of the injuries sustained in the different body regions in power paragliding as emerged from this study.(chi -square ,  $p < 0,001$ ).**

| Body region       | Body area | No. Cases | Types of Injury (number of cases)                                                                                                                                                              | Tot | % of all injuries |
|-------------------|-----------|-----------|------------------------------------------------------------------------------------------------------------------------------------------------------------------------------------------------|-----|-------------------|
| <b>Head</b>       | Head      | 7         | Concussions(3), unknown(2), contusions(1), open wounds(1)                                                                                                                                      | 18  | 7%                |
|                   | Neck      | 3         | Burnings(1), C2 fracture(1), unknown(1)                                                                                                                                                        |     |                   |
|                   | Face      | 8         | Fractures(4>), lacerations(2), burnings(1), other(1)                                                                                                                                           |     |                   |
| <b>Chest</b>      | Chest     | 7         | Rib fractures(2), abrasions(1), burnings(1), contusions(1), open wounds (1), unkown(1)                                                                                                         | 7   | 2.7%              |
| <b>Upper Limb</b> | Shoulder  | 32        | Fractures(6), open wounds(5), bruising(4), other(3),tendon injuries (3),dislocations (2),lacerations (2),unknown (2),abrasions (1),burnings (1),contusions (1),muscle strains (1), sprains (1) | 114 | 44.5%             |
|                   | Arm       | 26        | Lacerations(7), burnings(5), contusions(3), fractures(3), unknown(3), open wounds(2), tendon rupture(1), abrasions(1), sprains(1)                                                              |     |                   |
|                   | Forearm   | 11        | Burnings(2), lacerations(2), fractures(2), unknown(2), contusions(1) open wounds(1), soft tissue injuries(1)                                                                                   |     |                   |
|                   | Wrist     | 8         | Fractures(3), contusions(2), lacerations(1), other(1), sprains(1)                                                                                                                              |     |                   |
|                   | Elbow     | 5         | Open wounds(2), abrasions(1), burnings(1), unknown(1)                                                                                                                                          |     |                   |
|                   | Hand      | 32        | Fractures(17; 11 with amputation), open wounds(6), lacerations(3), contusion(2), muscle strains(1), other(1), sprains(1), unknown(1)                                                           |     |                   |
| <b>Abdomen</b>    | Abdomen   | 2         | Contusion(1), soft tissue(1) ,                                                                                                                                                                 | 2   | 0.7%              |
| <b>Back</b>       | Back      | 25        | Fractures(8), unknown(8), other(3), contusions(2), abrasions(1), burnings(1), muscle strains(1), open wounds(1)                                                                                | 25  | 9,7%              |
| <b>Pelvis</b>     | Pelvis    | 8         | Fractures(4), contusion(1), internal bruising(1), muscle strain(1),                                                                                                                            | 8   | 3.1%              |



|                              |                   |             |             |             |
|------------------------------|-------------------|-------------|-------------|-------------|
| <b>Handling</b>              | <b>BMJ Open</b>   | 53,8        | 23,1        | 23,1        |
| <b>Line Tangle/Damage</b>    |                   | 100         | 0           | 0           |
| <b>Collision</b>             | <b>with other</b> | 40          | 40          | 20          |
| <b>Aircraft/Ultralight</b>   |                   |             |             |             |
| <b>Water Immersion</b>       |                   | 14,3        | 14,3        | 71,4        |
| <b>All Types of Incident</b> |                   | <b>56,6</b> | <b>31,2</b> | <b>12,2</b> |

The correlation between accident severity and pilot rating is scarcely significant (chi-square, p=0.044; confidence 95%).

The data on the collateral damage from the various accidents reveals that in addition to the 383 pilots directly involved, seven bystanders and sixteen pilots of other aircraft involved in collisions were also injured, for a total of 406 persons. The data was insufficient to precisely classify the severity of the injuries suffered by these persons. No injuries were sustained in thirteen cases.

A paramotor instructor was struck on the right hand by a pilot's propellor, with lesion of the ulnar artery and various fractures.

A bystander was struck on the right foot, with the amputation of three toes and injury to the remaining two. A spectator struck by the propellor of a PPG sustained severe facial injuries and another sustained minor injuries to the eye area.

Another bystander suffered amputation of the last three fingers of his left hand after being struck by a paramotor propellor.

A bystander was hit during a hard landing, suffering a minor injury to the forearm.

A power-paraglider pilot was struck by a PPG which was taking off, with the loss of a tooth, and two passengers of a hot air balloon hit during flight by a PPG sustained unknown but minor injuries, as did a power paraglider pilot hit by another PPG.

**Discussion**

In our study, the weather conditions were a main or contributing cause of accidents in 10,1% of cases: weather conditions alone were the cause in 5.7% of cases, while the weather conditions contributed to the accident together with pilot error in 4.4% of accidents. This figure is much lower than that reported in paragliding by Zeller [8], who cite adverse weather conditions as a cause in

1  
2  
3  
4  
5  
6  
7  
8  
9  
10  
11  
12  
13  
14  
15  
16  
17  
18  
19  
20  
21  
22  
23  
24  
25  
26  
27  
28  
29  
30  
31  
32  
33  
34  
35  
36  
37  
38  
39  
40  
41  
42  
43  
44  
45  
46  
47  
48  
49

accident, or be the direct cause of injuries.

Our study data showed that the majority of accidents occurred during takeoff (32.9%, or 43% if we include those during run-up and inflation, phases which can be considered an integral part of takeoff with a paramotor), while in paragliding, the most dangerous phase of the flight is landing [3,8].

This can be explained by the fact that takeoff with a PPG requires a delicate balance between the thrust of the engine, the weight of the crew and the lift of the wing. Additionally, the takeoff from level ground and the prevalently horizontal thrust of the engine results in the pilot moving away from the ground slowly, as opposed to paragliding, where the distance from the ground increases rapidly due to taking off from a slope.

As a result, falling distance remains reduced for much longer during takeoff with a PPG than with a P, limiting the possibility of adopting emergency manoeuvres and making use of an emergency parachute impossible.

The use of an engine can be the direct cause of accidents distinctive to PPG: the two causes listed as “fuel exhaustion” and “mechanical failure: power-plant/propeller” were responsible for 14% of accidents.

The engine may also aggravate the accident, mainly due to the energy it produces and transmits to the crew, but also because of its weight. It is mounted on a special frame worn by the pilot: the overall weight of the equipment and accompanying power-plant vary between 20 and 40 kg. In the case of collision, both of these factors synergise to make the impact more traumatic given that engine displacement varies between 80cc and 250cc and engine power varies between 11 to 22.5kW; engine thrust is highest during takeoff: the phase of flight when PPG accidents occur most frequently.

In certain reports it is explicitly mentioned that it was precisely the energy supplied to the engine which rendered the impact fatal.

Various reports also describe that pilot errors had been to some extent determined by a state of mental confusion suffered by the pilot during the execution of acrobatic stunts.

Steep spirals are extremely dangerous manoeuvres in PPG: the position of the crew and the centrifugal acceleration (increased by the thrust of the engine) hinder blood supply to the brain, with

a high risk of suffering blackouts – or in any case a momentary state of mental confusion – at a time

fatal) case of near-drowning. It is therefore inadvisable to fly a paramotor over or near water; it is essential that pilots, wishing to do so, adopt the use of self-inflating and specially designed safety systems.

These auto-inflating flotation devices are mounted on a paramotor's frame and are activated by a CO2 cartridge which fires upon submersion: so no pilot input is required.

Paragliding injuries mainly involve lower limbs and spine [3, 8-15] while in PPG the upper limbs are more frequently affected, while spinal injuries are less frequently involved.

The different injury distribution may depend in part on the different flight dynamics and different distribution of the forces acting on the crew due to the thrust of the engine and the weight of the equipment.

The engine is undoubtedly the factor which distinguishes PPG from paragliding in terms of injury type; contact with the propeller caused 43 accidents (11.22%) in our study and was responsible for the majority of injuries to the upper limbs, in particular lesions to the hands (Fig. 2), wrists, forearms, arms and shoulders, as well as all eleven fractures with loss of fingers cited in this study. Contact with incandescent engine parts was the cause of four cases of burnings to the face, neck, back, shoulder, arm, elbow, forearm, calf, thigh and ankle, while two cases of generalised burnings were the result of actual fires caused by combustion of the engine fuel. In another case, electrical burnings to the chest and one arm were sustained following collision with high voltage power lines. Contact with power lines is an established cause of accidents in P also, while burnings resulting from engine fuel combustion or contact with the engine are limited to PPG.

Indeed PPG is widely believed to be safer than paragliding, and fatal events considered to be rarer than in paragliding[1], in our study, 6% of accidents were fatal (fatal accidents/ total number of accidents: 23/383).

This figure is not lower than the values cited in literature for paragliding and hang-gliding (table 10) and is in any case comparable with the 6.1% of fatal paragliding accidents reported by Schulze (2002)[16] in a study very similar to ours, since it was conducted using the data from incident reports.

Considering the differences between PPG and paragliding future studies of this sport and related injuries should be conducted separately from paragliding, in separate case studies.

Certain types of safety clothing and equipment can significantly reduce various risks specific to this

1  
2  
3  
4  
5  
6  
7  
8  
9  
10  
11  
12  
13  
14  
15  
16  
17  
18  
19  
20  
21  
22  
23  
24  
25  
26  
27  
28  
29  
30  
31  
32  
33  
34  
35  
36  
37  
38  
39  
40  
41  
42  
43  
44  
45  
46  
47  
48  
49

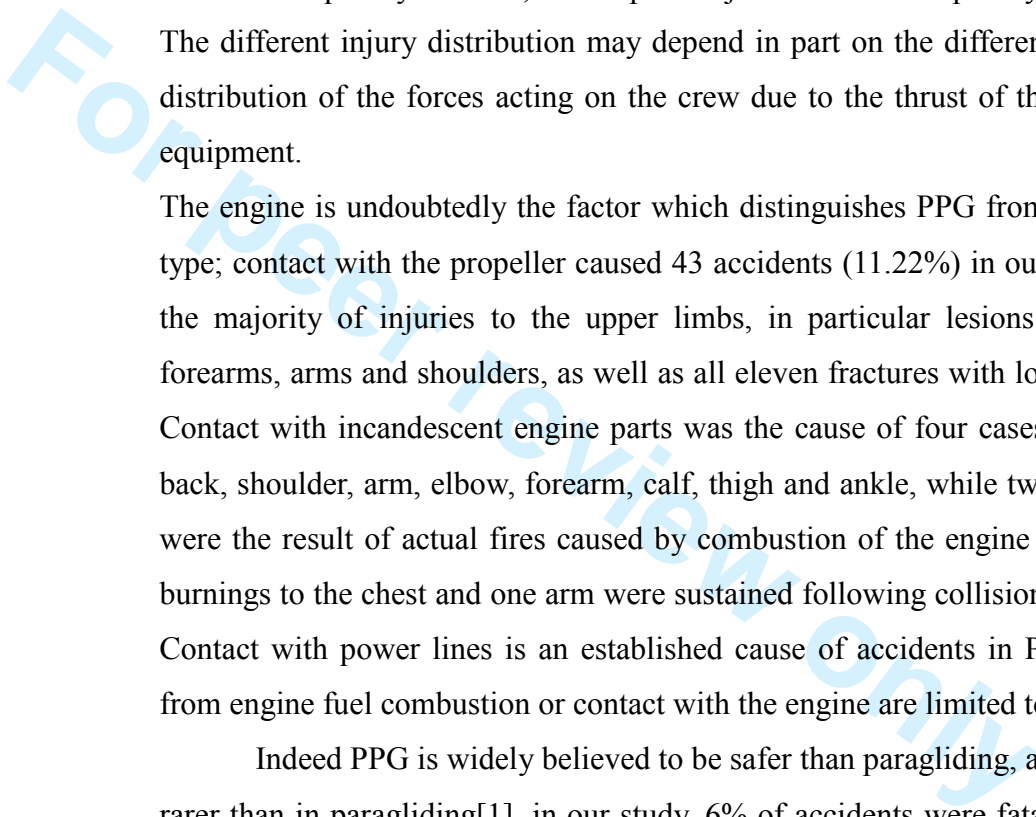

The safety ring makes it difficult to an open human hand from going into the prop at full rated thrust and adds very little in terms of expense, and weight to the paramotor. Its use should be made obligatory, given that these injuries are often severe, in some cases involving amputation of the fingers. Given the extreme danger of water immersion, it is essential that pilots equip themselves with an Agama when flying near water. As in paragliding, periodical checking and maintenance of equipment (the wing and lines in particular) is essential. Additionally, in PPG, careful inspection and maintenance of the engine is vital, given that its malfunctioning is a major cause of accidents.

This study has some limitations.

First of all since there is no way of finding exactly how many people knew the existence of the database, the effect of of under-reporting bias due to the voluntary nature of our data collection, can be hardly estimated .

In addition, being the injury reporting online, only powered paragliders with access to the Internet were able to participate. For this reason, even though most people use the Internet, selection bias cannot be excluded at all.

Finally the lack of a specific question about the kind of injury in the form, might have led to the loss of some data even if in almost all the cases it was possible to obtain detailed informations on the type of injuries by a careful reading of the narrative section of the reports.

### Conclusions

This study reveals a pattern of accidents in PPG clearly different from that of paragliding: PPG accidents are more common during takeoff; weather and wind conditions have a lesser influence in causing accidents, the energy from the engine and the weight of the equipment may aggravate accidents.

The pattern of injuries sustained in this sport are distinctive: mostly involving the upper limbs, while those to the spine are less common. Finally, contrary to the belief held up to now by the experts of this sport[1], the number of fatal accidents/number of accidents is not lower than those which occur in P and in hang-gliding[9,10,16,17](table 8).

**Table 8. Studies on Paragliding and Hang-gliding reporting fatal outcome after accidents.**

| Sport       | Study                           | No. fatalities | No. participants | % Fatal events |
|-------------|---------------------------------|----------------|------------------|----------------|
| Paragliding | Krüger-Franke et al. (1991)[9]. | 2              | 218              | 0.91%          |

reports. Further studies will be useful to confirm the data from this study: we can nevertheless assert that safety equipment such as protective gloves, a safety ring and an auto-inflating flotation devices, in addition to periodical checks of the engine can reduce certain risks specific to this sport.

For peer review only

1  
2  
3  
4  
5  
6  
7  
8  
9  
10  
11  
12  
13  
14  
15  
16  
17  
18  
19  
20  
21  
22  
23  
24  
25  
26  
27  
28  
29  
30  
31  
32  
33  
34  
35  
36  
37  
38  
39  
40  
41  
42  
43  
44  
45  
46  
47  
48  
49

Francesco Feletti carried out statistical analyses and wrote the draft of the manuscript. All authors contributed to critical revisions of the manuscript and approved the final version.

**Data sharing statement** No additional data are available.

**Competing interests** None.

**Funding statement**  
The authors received no funding for this research

For peer review only

1  
2  
3  
4  
5  
6  
7  
8  
9  
10  
11  
12  
13  
14  
15  
16  
17  
18  
19  
20  
21  
22  
23  
24  
25  
26  
27  
28  
29  
30  
31  
32  
33  
34  
35  
36  
37  
38  
39  
40  
41  
42  
43  
44  
45  
46  
47  
48  
49



[2] Feletti F. Multiple injuries in paramotoring: a case report to assess this sport's risks  
American Journal of Sports Science. 2013; 1(1): 7-11.

[3] Rekand T The Epidemiology of injury in hang-gliding and paragliding. In Heggie TW, Caine DJ  
(eds): Epidemiology of Injury in Adventure and Extreme Sports. Med Sports Sci. Basel, Kager  
2012; 58: 44-56.

[4] USPPA- United States Powered Paragliding Association.  
[http://www.usppamembers.org/incidents/incident\\_new.cfm](http://www.usppamembers.org/incidents/incident_new.cfm). [Oct 2013].

[5] Fuller CW, Ekstrand J, Junge A, et al. Consensus statement on injury definitions and data  
collection procedures in studies of football ( soccer) injuries. Clin J Sport Med. 2006; 16(2): 83-92.

[6] Fuller CW, Ekstrand J, Junge A, et al. Consensus statement on injury definitions and data  
collection procedures in studies of football ( soccer) injuries. Scand J Med Sci Sports 2006;16 (2)  
83-92.

[7] Fuller CW, Ekstrand J, Junge A, et al. Consensus statement on injury definitions and data  
collection procedures in studies of football (soccer) injuries. Clin J Sport Med. 2006; 40(3): 193-  
201.

[8] Zeller T, Billing A, Lob G. Injuries in paragliding. Int Orthop. 1992;16(3): 255-9.

[9] Krüger-Franke M, Siebert CH, Pfürringer.W. Paragliding injuries. Br J Sports Med 1991; 25(2):  
98-101.

[10] Fasching G, Schippinger G, Pretscher R. Paragliding accidents in remote areas.1997  
Aug;8(3):129-33.

[11] Rekand T, Schaanning EE, Varga V, et al. Spinal cord injuries among paragliders in Norway.  
Spinal Cord. 2008 Jun;46(6): 412-16.

[12] Hasler RM, Hüttner HE, Keel MJ, et al. Spinal and pelvic injuries in airborne sports: a  
retrospective analysis from a major Swiss trauma centre. Injury. 2012; 43(4): 440-5.

[13] Exadaktylos AK, Scwabas G, Eggli S, et al. Paragliding accidents--the spine is at risk. A study  
from a Swiss Trauma Centre. Eur J Emerg Med. 2003; 10(1): 27-9.

[14] Gauler R, Moulin P, Koch HG, et al. Paragliding accidents with spinal cord injury: 10 years'  
experience at a single institution. Spine. 2006; 31(10): 1125-30.

[15] Layer J, Mei Dan O. Paragliding. In Mei Dan O, Carmont M. Adventure and Extreme Sports

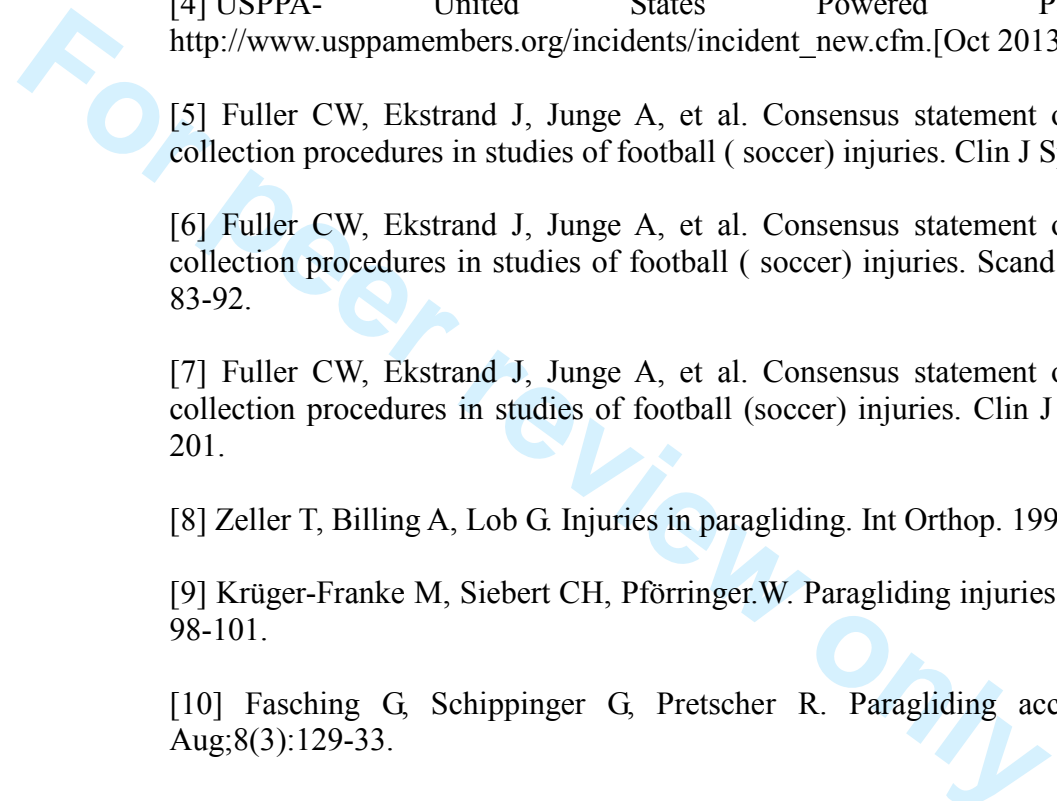

**FIGURE LEGENDS**

Fig. 1: Paramotor in flight

Fig. 2: Serious hand lesions caused by contact with the engine prop: these injuries are specific to powered paragliding.

For peer review only

1  
2  
3  
4  
5  
6  
7  
8  
9  
10  
11  
12  
13  
14  
15  
16  
17  
18  
19  
20  
21  
22  
23  
24  
25  
26  
27  
28  
29  
30  
31  
32  
33  
34  
35  
36  
37  
38  
39  
40  
41  
42  
43  
44  
45  
46  
47  
48  
49

Keywords

**Extreme Sports, Sporting injuries, Protective clothing, Motor sports, Injury prevention**

**Corresponding Author**

Francesco Feletti, MD,

*Presidio Ospedaliero di Ravenna, Ausl della Romagna, U.O.Radiologia;*

*ExtremeSportMed*

*Imola - Bologna, Italy;*

*e-mail: [feletti@extremesportmed.net](mailto:feletti@extremesportmed.net)*

*Phone: +39 393 123 0 456*

*Postal Address: Viale Amendola 91 40026 Imola (Bologna)*

**Authors**

**Francesco Feletti, MD,**

*Ospedale di Ravenna S. Maria delle Croci - AUSL della Romagna, U.O.Radiologia*

*Ravenna, Italy;*

*ExtremeSportMed*

*Imola - Bologna, Italy;*

**Jeff Goin, Capt,**

*B.S. Aeronautical Science, Embry Riddle Aeronautical University*

**ABSTRACT**

**Objectives** - Powered paragliding is a clearly distinct sport from paragliding, mainly because of the use of an engine. We supposed that the differences between these two sports result in different types of injuries.

**Setting** - To test this hypothesis, we analysed 384 incident reports gathered by the United States Powered Paragliding Association from 1995 to 2012.

The majority of the incidents described occurred in the US, while 26 incidents occurred elsewhere: Canada (8), Mexico (5), Panama (1), China (1), Japan (1), Malaysia (1), Indonesia (Java)(1), Europe (8): of which Spain (1), Belgium (1), United Kingdom (3), Italy (1), Romania (1), Unknown (1).

**Outcome:** to identify the most affected body area and the most common type of injury sustained in PPG, and to highlight any differences with respect to paragliding.

**Results** - The most affected body areas in PPG were the upper limbs (44.5%) followed by the lower limbs (32 %), the back (9,8%), the head (7%), the pelvis (3,1), the chest (2,7%) and the abdomen (0,7%) ( $p < 0,001$ ).

The engine caused 43 accidents (11.22%) in our study and was responsible for the majority of injuries to the upper limbs.

The number of fatal accidents is not lower than those which occur in paragliding and in hang-gliding.

**Conclusions** - **To help to prevent the specific injuries of powered paragliding, the most appropriate equipment should be identified.**

The results of this study also suggest that in future this sport should be studied using studies and case reports distinct from those of paragliding.

**Strengths and limitations of this study**

**This is the first study in literature on powered paragliding.**

We analyzed a large amount of data (384 incident reports) collected from 1995 to 2012.

means of long lines. It is a completely different sport from paragliding because the equipment used includes an engine worn on the back and held in place by a harness (Fig. 1).

In contrast to paragliding, which is practised over hilly or mountain areas, because it requires a descent in order to take off, the PPG can take off from level ground thanks to the power of the engine.

It is safer to fly over level ground because there are fewer obstacles, the thermals are not too strong and winds are generally steady.

Furthermore PPG differs from paragliding because the thrust of the engine allows the paramotor pilot to take off and fly without the need for strong winds or thermals, therefore in safer and more stable weather conditions.

Compared to other aerial sports, paragliding nevertheless remains the most similar to PPG: both require the pilot to keep the wing inflated by means of his own weight and skill.

PPG was invented in the 1980's and rapidly gained popularity, so much so that various national and international competitions have been held throughout the world over the last few years.

In 2007 it was estimated that the sport was practised only in the United States, by just 3000 persons [1].

As PPG has grown in popularity, the number of accidents associated with this sport has inevitably increased. A knowledge of accident dynamics, the type of injuries sustained and the body area affected is of vital importance for sports medicine to provide an insight into the types of conduct, protective clothing and safety systems to adopt to improve the safety of any given sport.

A careful examination of the literature leads us to conclude that there are no existing studies of this sport in medical literature except from a case we have previously reported [2]: in a recent literature review [3], this sport is only mentioned among the variety of paragliding, to which it is usually grouped.

Given that the way of flying a paramotor is very different to that of a paraglider, we supposed that the accident and injury types differ greatly between the two sports as a result.

The aim of this study is to clarify the dynamics of paramotoring accidents, the conditions in which these occur, the type of injuries sustained, and to highlight any differences with respect to paragliding.

1  
2  
3  
4  
5  
6  
7  
8  
9  
10  
11  
12  
13  
14  
15  
16  
17  
18  
19  
20  
21  
22  
23  
24  
25  
26  
27  
28  
29  
30  
31  
32  
33  
34  
35  
36  
37  
38  
39  
40  
41  
42  
43  
44  
45  
46  
47  
48  
49

2012 (the starting date of the present study).

BMJ Open

The collection of data was primarily thought for accidents in the U.S. but since USPPA is very popular among powered paragliders worldwide, also accidents from other countries were reported.

The forms submitted had been completed by the pilot involved, a witness who had seen the accident, or by the Association itself based on the information gathered.

The form included: drop-down menu lists, checklists and text fields and consisted of five sections:

1-General information (date, time and place of the accident);

2-Pilot information, including demographic information and details of the pilot's PPG experience;

3-Details of the accident, including a description of the type of accident, the main cause, weather conditions at the time, characteristics of the takeoff and landing area, and details of the pilot's clothing and equipment;

4-Injury information: including the body parts affected, the seriousness of the injury, any medical assistance and possible collateral damage to people or things.

5-Narrative: an extended description of the event and its consequences.

In the form, a specific question on the quality of injuries was missing, but a careful reading of the narrative section allowed to obtain these informations from almost all the forms.

When these data were missing they were named as 'unknown' in the results.

The data published by the USPPA were public and anonymous; its use for study and publication purposes was authorised beforehand by the USPPA.

The data were analysed using descriptive statistics, using the software Wizard Pro 1.3.27 and the *chi-square* test.

The following definition of injury has been adopted: "any physical complaint sustained by an athlete that results from training or competition, irrespective of the need for medical attention or time lost from sports activities"[5-7].

Each incident report was also given a NACA(National Advisory Committee of Aeronautics) Score: a 7-point system (table 1) developed to assess the severity of injuries and diseases sustained or developed during aviation accidents. Based on the available data, nevertheless, it was not possible to distinguish between classes V and VI in all cases.

For peer review only - <http://bmjopen.bmj.com/site/about/guidelines.xhtml>

**Table 1: NACA Score**

| Category | Definition | Frequency |
|----------|------------|-----------|
|----------|------------|-----------|

|          |                                                                                                                                                                               |                                                                                           |
|----------|-------------------------------------------------------------------------------------------------------------------------------------------------------------------------------|-------------------------------------------------------------------------------------------|
| NACA I   | interventions necessary.                                                                                                                                                      | E.g. slight abrasion.                                                                     |
| NACA II  | Slight to moderately heavy injury or illness. Further diagnostic examination needed or outpatient medical investigation, but usually no emergency medical measures necessary. | E.g. fracture of a finger bone, moderate cuts, dehydration.                               |
| NACA III | Moderate to heavy but not life-threatening disorder. Frequently emergency medical measures on the site                                                                        | E.g. femur fracture, milder stroke, smoke inhalation                                      |
| NACA IV  | Heavy injury or illness where rapid development into a life threatening condition can not be excluded. Emergency medical care is required                                     | E.g. vertebral injury with neurological deficit, severe asthma attack; drug poisoning     |
| NACA V   | Acute vital (life threatening) danger                                                                                                                                         | E.g. third grade skull or brain trauma, severe heart attack, significant opioid poisoning |
| NACA VI  | Breath and/or cycle stop and/or reanimation                                                                                                                                   | ---                                                                                       |
| NACA VII | Death                                                                                                                                                                         | ---                                                                                       |

Both categories cover conditions posing an immediate threat to life and requiring immediate emergency medical assistance: therefore we decided to consider them as a single category.

We subsequently focused on the accidents resulting in injuries (disregarding those with a NACA score of 0), and divided these into 3 classes based on the severity of the injuries:

1-minor (NACA I, II), usually not requiring emergency medical measures

2-major (NACA III, IV, V, VI), almost always requiring emergency medical measures

3-fatal (NACA VII).

We associated the incidents thus classified with the accident dynamics cited in the incident reports and with the phase of flight in which the accidents occurred. We also explored the correlation

between injury severity and pilot rating, and between injury severity and accident dynamics.

For peer review only - <http://bmjopen.bmj.com/site/about/guidelines.xhtml>

## Results

The pilots involved in power paragliding accidents were aged between 24 and 72 (average age=

excluded.

### BMJ Open

The majority of the incidents described occurred in the US, while 26 incidents occurred elsewhere: Canada (8), Mexico (5), Panama (1), China (1), Japan (1), Malaysia (1), Indonesia (Java)(1), Europe (8): of which Spain (1), Belgium (1), United Kingdom (3), Italy (1), Romania (1), Unknown (1). Only three incidents involved a female pilot.

Pilot injuries were classified according to NACA category (table 2): 23 incidents were fatal.

**Table 2. NACA Score of PPG accidents in this study**

| NACA Category | Pilots | %    |
|---------------|--------|------|
| <b>0</b>      | 194    | 50,6 |
| <b>I</b>      | 59     | 15,4 |
| <b>II</b>     | 48     | 12,5 |
| <b>III</b>    | 43     | 11,2 |
| <b>IV</b>     | 11     | 2,9  |
| <b>V + VI</b> | 5      | 1,3  |
| <b>VII</b>    | 23     | 6    |

The following factors were taken into consideration: the phase of flight during which the accident took place (table 3), the primary cause (table 4) and the type of accident (table 5).

As for the experience of the pilots involved, pilot rating was distributed as follows: 25,5% PPG2, 13,5% PPG1, 15,1% PPG3, 9,1% Instructor, 12,8% None, 11,7% Not applicable, 6% Unknown, 1,8% Other.

No statistically significant correlation was found in our sample between accident severity and pilot rating (chi-square,  $p=0.044$ ).

With reference to the place where the accidents occurred, these are the following data: 70,5% flat terrain, 11,4% not applicable, 8,8% hilly terrain, 2,6% water, 2,6% mountainous terrain, 2,6% unknown data, 1,3% other.

**Table 3. Phase of Flight** For peer review only: <http://bmjopen.bmj.com/site/about/guidelines.xhtml>

| Phase of Flight | Count | % |
|-----------------|-------|---|
|                 |       |   |



|                      |          |       |
|----------------------|----------|-------|
| landing)             | BMJ Open |       |
| Not Applicable/Other | 56       | 14,6% |

Table 4. Primary cause of accidents

| Primary cause                                           | Tot. | %    |
|---------------------------------------------------------|------|------|
| Pilot Errors (only)                                     | 205  | 53,5 |
| Mechanical Failure (including fuel exhaustion)          | 67   | 17,5 |
| Pilot Error & Weather                                   | 17   | 4,4  |
| Pilot Error & Mechanical Failure                        | 17   | 4,4  |
| Weather (Gust, Thermal, Rain, Wind increase, etc..).    | 22   | 5,7  |
| Not Applicable/unknown                                  | 24   | 4,4  |
| Other (including wake Turbulence/Tight takeoff/LZ Area) | 31   | 1,8  |

Table 5. Type of accidents

| Type                                         | Tot. | %    |
|----------------------------------------------|------|------|
| Collision with Terrain/Obstruction on Ground | 76   | 19,8 |
| Powerplant Equipment Malfunction             | 58   | 15,1 |
| Body contact with spinning prop              | 43   | 11,2 |
| Hard Landing                                 | 40   | 10,4 |
| Fall                                         | 37   | 9,7  |
| Wing Malfunction or Deflation                | 35   | 9,1  |
| Other                                        | 29   | 7,5  |
| Handling                                     | 20   | 5,2  |
| Line Tangle/Damage                           | 15   | 3,9  |
| Collision with other Aircraft/Ultralight     | 14   | 3,6  |
| Water Immersion                              | 10   | 2,6  |

To identify the most affected body areas and therefore most critical areas for the development of protective clothing, we calculated the number of injuries sustained in each body area (table 6). On a total of 256 injuries, the most affected body areas were the upper limbs (44.5%) followed by the lower limbs (32 %) and the back (9,7 %).

**Table 6. Distribution of the injuries sustained in the different body regions in power paragliding as emerged from this study.(chi -square , p < 0,001).**

| Body region       | Body area | No. Cases | Types of Injury (number of cases)                                                                                                                                                             | Tot | % of all injuries |
|-------------------|-----------|-----------|-----------------------------------------------------------------------------------------------------------------------------------------------------------------------------------------------|-----|-------------------|
| <b>Head</b>       | Head      | 7         | Concussions(3), unknown(2), contusions(1), open wounds(1)                                                                                                                                     | 18  | 7%                |
|                   | Neck      | 3         | Burnings(1), C2 fracture(1), unknown(1)                                                                                                                                                       |     |                   |
|                   | Face      | 8         | Fractures(4>), lacerations(2), burnings(1), other(1)                                                                                                                                          |     |                   |
| <b>Chest</b>      | Chest     | 7         | Rib fractures(2), abrasions(1), burnings(1), contusions(1), open wounds (1), unkown(1)                                                                                                        | 7   | 2.7%              |
| <b>Upper Limb</b> | Shoulder  | 32        | Fractures(6), open wounds(5), bruising(4), other(3),tendon injuries(3),dislocations (2),lacerations (2),unknown (2),abrasions (1),burnings (1),contusions (1),muscle strains (1), sprains (1) | 114 | 44.5%             |
|                   | Arm       | 26        | Lacerations(7), burnings(5), contusions(3), fractures(3), unknown(3), open wounds(2), tendon rupture(1), abrasions(1), sprains(1)                                                             |     |                   |
|                   | Forearm   | 11        | Burnings(2), lacerations(2), fractures(2), unknown(2), contusions(1) open wounds(1), soft tissue injuries(1)                                                                                  |     |                   |
|                   | Wrist     | 8         | Fractures(3), contusions(2), lacerations(1), other(1), sprains(1)                                                                                                                             |     |                   |
|                   | Elbow     | 5         | Open wounds(2), abrasions(1), burnings(1), unknown(1)                                                                                                                                         |     |                   |
|                   | Hand      | 32        | Fractures(17; 11 with amputation), open wounds(6), lacerations(3), contusion(2), muscle strains(1), other(1), sprains(1), unknown(1)                                                          |     |                   |
| <b>Abdomen</b>    | Abdomen   | 2         | Contusion(1), soft tissue(1) ,                                                                                                                                                                | 2   | 0.7%              |
| <b>Back</b>       | Back      | 25        | Fractures(8), unknown(8), other(3), contusions(2), abrasions(1), burnings(1), muscle strains(1), open wounds(1)                                                                               | 25  | 9,7%              |
| <b>Pelvis</b>     | Pelvis    | 8         | Fractures(4), contusion(1), internal bruising(1), muscle strain(1), other(1)                                                                                                                  | 8   | 3.1%              |
| <b>Lower Limb</b> | Thigh     | 13        | Fractures(4), contusions(2), lacerations(2), open wounds(2), abrasion(1), burnings(1), unknown(1)                                                                                             | 82  | 32%               |

Of the twenty-three fatal accidents, five were the result of an involuntary landing in water: one autopsy revealed the cause of drowning to be head injury with haemorrhage and loss of consciousness.

Another two accidents were fatal due to cerebral spine fractures with spinal cord damage.

In four cases, death was caused by severe head trauma. In all remaining cases, death was the result of high-energy multi-trauma, although the reports do not allow us to identify the precise injuries responsible for death, even if this were possible.

Most of the injuries were minor ones (NACA I-II) followed by major ones(NACA III-VI) and fatals ones (NACA VII).

No significant difference in the distribution of fatal, major and minor injuries among the three main phases of flight (takeoff including inflation and runup, cruise and landing including approach) was found.

**With regard to the relationship between accident dynamic and accident severity, body contact with spinning prop and wing malfunction/deflation prevalently caused major injuries (NACA III-VI), representing respectively 55,6% and 56,2% of the injuries causes.**

**Accidents due to water immersion were prevalently fatal (71,4%).**

**The other dynamics of injuries cause mainly minor injuries (NACA I-II).**

The statistical correlation between injury severity and type of incident (chi-square,  $p < 0.001$ ; confidence 95%) is shown in Table. 7.

**Table 7. Severity of Injuries by Type of Incident**

| Type of incident                                    | Minor (%) | Major (%) | Fatal (%) |
|-----------------------------------------------------|-----------|-----------|-----------|
| <b>Collision with Terrain/Obstruction on Ground</b> | 62,5      | 18,8      | 18,8      |
| <b>Powerplant Equipment Malfunction</b>             | 100       | 0         | 0         |
| <b>Body contact with spinning prop</b>              | 44,4      | 55,6      | 0         |
| <b>Hard Landing</b>                                 | 74,1      | 22,2      | 3,7       |
| <b>Fall</b>                                         | 54,5      | 40,9      | 4,5       |

1  
2  
3  
4  
5  
6  
7  
8  
9  
10  
11  
12  
13  
14  
15  
16  
17  
18  
19  
20  
21  
22  
23  
24  
25  
26  
27  
28  
29  
30  
31  
32  
33  
34  
35  
36  
37  
38  
39  
40  
41  
42  
43  
44  
45  
46  
47  
48  
49

1  
2  
3  
4  
5  
6  
7  
8  
9  
10  
11  
12  
13  
14  
15  
16  
17  
18  
19  
20  
21  
22  
23  
24  
25  
26  
27  
28  
29  
30  
31  
32  
33  
34  
35  
36  
37  
38  
39  
40  
41  
42  
43  
44  
45  
46  
47  
48  
49

|                                                          |             |             |             |
|----------------------------------------------------------|-------------|-------------|-------------|
| <b>Collision with BMJ Open other Aircraft/Ultralight</b> | 40          | 40          | 20          |
| <b>Water Immersion</b>                                   | 14,3        | 14,3        | 71,4        |
| <b>All Types of Incident</b>                             | <b>56,6</b> | <b>31,2</b> | <b>12,2</b> |

The correlation between accident severity and pilot rating is scarcely significant (chi-square, p=0.044; confidence 95%).

The data on the collateral damage from the various accidents reveals that in addition to the 383 pilots directly involved, seven bystanders and sixteen pilots of other aircraft involved in collisions were also injured, for a total of 406 persons. The data was insufficient to precisely classify the severity of the injuries suffered by these persons. No injuries were sustained in thirteen cases.

A paramotor instructor was struck on the right hand by a pilot's propellor, with lesion of the ulnar artery and various fractures.

A bystander was struck on the right foot, with the amputation of three toes and injury to the remaining two. A spectator struck by the propellor of a PPG sustained severe facial injuries and another sustained minor injuries to the eye area.

Another bystander suffered amputation of the last three fingers of his left hand after being struck by a paramotor propellor.

A bystander was hit during a hard landing, suffering a minor injury to the forearm.

A power-paraglider pilot was struck by a PPG which was taking off, with the loss of a tooth, and two passengers of a hot air balloon hit during flight by a PPG sustained unknown but minor injuries, as did a power paraglider pilot hit by another PPG.

**Discussion**

In our study, the weather conditions were a main or contributing cause of accidents in 10,1% of cases: weather conditions alone were the cause in 5.7% of cases, while the weather conditions contributed to the accident together with pilot error in 4.4% of accidents. This figure is much lower than that reported in paragliding by Zeller [8], who cite adverse weather conditions as a cause in 19% of paragliding accidents.

For peer review only: <https://www.bmj.com/site/about/guidelines.xhtml>

This can be explained by the fact that engine makes it possible to fly frequently and in a much

43% if we include those during run-up and inflation, phases which can be considered an integral part of takeoff with a paramotor), while in **paragliding**, the most dangerous phase of the flight is landing [3,8].

This can be explained by the fact that takeoff with a PPG requires a delicate balance between the thrust of the engine, the weight of the crew and the lift of the wing. Additionally, the takeoff from level ground and the prevalently horizontal thrust of the engine results in the pilot moving away from the ground slowly, as opposed to **paragliding**, where the distance from the ground increases rapidly due to taking off from a slope.

As a result, falling distance remains reduced for much longer during takeoff with a PPG than with a P, limiting the possibility of adopting emergency manoeuvres and making use of an emergency parachute impossible.

The use of a engine can be the direct cause of accidents distinctive to PPG: the two causes listed as “fuel exhaustion” and “mechanical failure: power-plant/propeller” were responsible for 14% of accidents.

The engine may also aggravate the accident, mainly due to the energy it produces and transmits to the crew, but also because of its weight. It is mounted on a special frame worn by the pilot: the overall weight of the equipment and accompanying power-plant vary between 20 and 40 kg. In the case of collision, both of these factors synergise to make the impact more traumatic given that engine displacement varies between 80cc and 250cc and engine power varies between 11 to 22.5kW; engine thrust is highest during takeoff: the phase of flight when PPG accidents occur most frequently.

In certain reports it is explicitly mentioned that it was precisely the energy supplied to the engine which rendered the impact fatal.

**Various reports also describe that pilot errors had been to some extent determined by a state of mental confusion suffered by the pilot during the execution of acrobatic stunts.**

Steep spirals are extremely dangerous manoeuvres in PPG; the position of the crew and the centrifugal acceleration (increased by the thrust of the engine) hinder blood supply to the brain, with a high risk of suffering blackouts - or in any case a momentary state of mental confusion-at a time when the maximum level of attention is required.

1  
2  
3  
4  
5  
6  
7  
8  
9  
10  
11  
12  
13  
14  
15  
16  
17  
18  
19  
20  
21  
22  
23  
24  
25  
26  
27  
28  
29  
30  
31  
32  
33  
34  
35  
36  
37  
38  
39  
40  
41  
42  
43  
44  
45  
46  
47  
48  
49

These auto-inflating flotation devices are mounted on a paramotor's frame and are activated by a CO2 cartridge which fires upon submersion: so no pilot input is required.

Paragliding injuries mainly involve lower limbs and spine [3, 8-15] while in PPG the upper limbs are more frequently affected, while spinal injuries are less frequently involved.

The different injury distribution may depend in part on the different flight dynamics and different distribution of the forces acting on the crew due to the thrust of the engine and the weight of the equipment.

The engine is undoubtedly the factor which distinguishes PPG from **paragliding** in terms of injury type; contact with the propeller caused 43 accidents (11.22%) in our study and was responsible for the majority of injuries to the upper limbs, in particular lesions to the hands (**Fig. 2**), wrists, forearms, arms and shoulders, as well as all eleven fractures with loss of fingers cited in this study. Contact with incandescent engine parts was the cause of four cases of burnings to the face, neck, back, shoulder, arm, elbow, forearm, calf, thigh and ankle, while two cases of generalised burnings were the result of actual fires caused by combustion of the engine fuel. In another case, electrical burnings to the chest and one arm were sustained following collision with high voltage power lines. Contact with power lines is an established cause of accidents in P also, while burnings resulting from engine fuel combustion or contact with the engine are limited to PPG.

Indeed PPG is widely believed to be safer than **paragliding**, and fatal events considered to be rarer than in **paragliding**[1], in our study, 6% of accidents were fatal (**fatal accidents/ total number of accidents: 23/383**).

This figure is not lower than the values cited in literature for **paragliding** and hang-gliding (table 10) and is in any case comparable with the 6.1% of fatal paragliding accidents reported by Schulze (2002)[16] in a study very similar to ours, since it was conducted using the data from incident reports.

Considering the differences between PPG and **paragliding** future studies of this sport and related injuries should be conducted separately from **paragliding**, in separate case studies.

Certain types of safety clothing and equipment can significantly reduce various risks specific to this sport. The use of protective gloves in particular can protect against hand injuries caused by contact with the spinning prop

obligatory, given that these injuries are often severe, in some cases involving amputation of the fingers. Given the extreme danger of water immersion, it is essential that pilots equip themselves with an Agama when flying near water. As in **paragliding**, periodical checking and maintenance of equipment (the wing and lines in particular) is essential. Additionally, in PPG, careful inspection and maintenance of the engine is vital, given that its malfunctioning is a major cause of accidents.

This study has some limitations.

First of all since there is no way of finding exactly how many people knew the existence of the database, the effect of of under-reporting bias due to the voluntary nature of our data collection, can be hardly estimated .

In addition, being the injury reporting online, only powered paragliders with access to the Internet were able to participate. For this reason, even though most people use the Internet, selection bias cannot be excluded at all.

Finally the lack of a specific question about the kind of injury in the form, might have led to the loss of some data even if in almost all the cases it was possible to obtain detailed informations on the type of injuries by a careful reading of the narrative section of the reports.

**Conclusions**

This study reveals a pattern of accidents in PPG clearly different from that of **paragliding**: PPG accidents are more common during takeoff; weather and wind conditions have a lesser influence in causing accidents, the energy from the engine and the weight of the equipment may aggravate accidents.

The pattern of injuries sustained in this sport are distinctive: mostly involving the upper limbs, while those to the spine are less common. Finally, contrary to the belief held up to now by the experts of this sport[1], the number of fatal accidents/number of accidents is not lower than those which occur in P and in hang-gliding[9,10,16,17](table 8).

**Table 8. Studies on Paragliding and Hang-gliding reporting fatal outcome after accidents.**

| Sport       | Study                           | No. fatalities | No. participants | % Fatal events |
|-------------|---------------------------------|----------------|------------------|----------------|
| Paragliding | Krüger-Franke et al. (1991)[9]. | 2              | 218              | 0.91%          |
| Paragliding | Schulze et al. (2002)[16].      | 25             | 409              | 6.10%          |
| Paragliding | Fashing et al. (1997)[10]       | 0              | 70               | 0.00%          |

1  
2  
3  
4  
5  
6  
7  
8  
9  
10  
11  
12  
13  
14  
15  
16  
17  
18  
19  
20  
21  
22  
23  
24  
25  
26  
27  
28  
29  
30  
31  
32  
33  
34  
35  
36  
37  
38  
39  
40  
41  
42  
43  
44  
45  
46  
47  
48  
49

The study was conceived by Francesco Feletti and Jeff Goin.

Jeff Goin collected data.

Francesco Feletti carried out statistical analyses and wrote the draft of the manuscript. All authors contributed to critical revisions of the manuscript and approved the final version.

**Data sharing statement** No additional data are available.

**Competing interests** None.

**Funding statement**

The authors received no funding for this research

**REFERENCES**

[1] Footflyer- The source for power paragliding information.

[http://www.footflyer.com/Safety/Incidents/incidents\\_and\\_analysis.htm](http://www.footflyer.com/Safety/Incidents/incidents_and_analysis.htm) [Oct 2013].

[2] Feletti F. Multiple injuries in paramotoring: a case report to assess this sport's risks  
*American Journal of Sports Science*. 2013; 1(1): 7-11.

[3] Rekand T The Epidemiology of injury in hang-gliding and paragliding. In Heggie TW, Caine DJ (eds): *Epidemiology of Injury in Adventure and Extreme Sports*. Med Sports Sci. Basel, Kager 2012; 58: 44-56.

[4] USPPA- United States Powered Paragliding Association.  
[http://www.usppamembers.org/incidents/incident\\_new.cfm](http://www.usppamembers.org/incidents/incident_new.cfm). [Oct 2013].

[5] Fuller CW, Ekstrand J, Junge A, et al. Consensus statement on injury definitions and data collection procedures in studies of football ( soccer) injuries. *Clin J Sport Med*. 2006; 16(2): 83-92.

[6] Fuller CW, Ekstrand J, Junge A, et al. Consensus statement on injury definitions and data collection procedures in studies of football ( soccer) injuries. *Scand J Med Sci Sports* 2006;16 (2) 83-92.

[7] Fuller CW, Ekstrand J, Junge A, et al. Consensus statement on injury definitions and data collection procedures in studies of football (soccer) injuries. *Clin J Sport Med*. 2006; 40(3): 193-201.

For peer review only - <http://bmjopen.bmj.com/site/about/guidelines.xhtml>

[8] Zeller I, Billing A, Lob G. Injuries in paragliding. *Int Orthop*. 1992;16(3): 255-9.

[9] Krüger-Franke M, Siebert CH, Pfürringer W. Paragliding injuries. *Br J Sports Med* 1991; 25(2):



[12] Hasler RM, Hüttner H, Keel MJ, et al. Spinal and pelvic injuries in airborne sports: a retrospective analysis from a major Swiss trauma centre. *Injury*. 2012; 43(4): 440-5.

[13] Exadaktylos AK, Scwabas G, Eggli S, et al. Paragliding accidents--the spine is at risk. A study from a Swiss Trauma Centre. *Eur J Emerg Med*. 2003; 10(1): 27-9.

[14] Gauler R, Moulin P, Koch HG, et al. Paragliding accidents with spinal cord injury: 10 years' experience at a single institution. *Spine*. 2006; 31(10): 1125-30.

[15] Laver L, Mei Dan O. Paragliding. In Mei Dan O, Carmont M. *Adventure and Extreme Sports Injuries*. Springer-Verlag London 2013; 12: 247-272.

[16] Schulze W, Richter J, Schulze B, et al. Injury prophylaxis in paragliding. *Br J Sports Med* 2002; 36: 365-69.

[17] Foray J, Abrassart S, Femmy T, et al. Hang-gliding accidents in high mountains. Apropos of 200 cases. *Chirurgie* 1991; 117(8): 613-7.

#### FIGURE LEGENDS

Fig. 1: Paramotor in flight

Fig. 2: Serious hand lesions caused by contact with the engine prop: these injuries are specific to powered paragliding.

1  
2  
3  
4  
5  
6  
7  
8  
9  
10  
11  
12  
13  
14  
15  
16  
17  
18  
19  
20  
21  
22  
23  
24  
25  
26  
27  
28  
29  
30  
31  
32  
33  
34  
35  
36  
37  
38  
39  
40  
41  
42  
43  
44  
45  
46  
47  
48  
49  
50  
51  
52  
53  
54  
55  
56  
57  
58  
59  
60

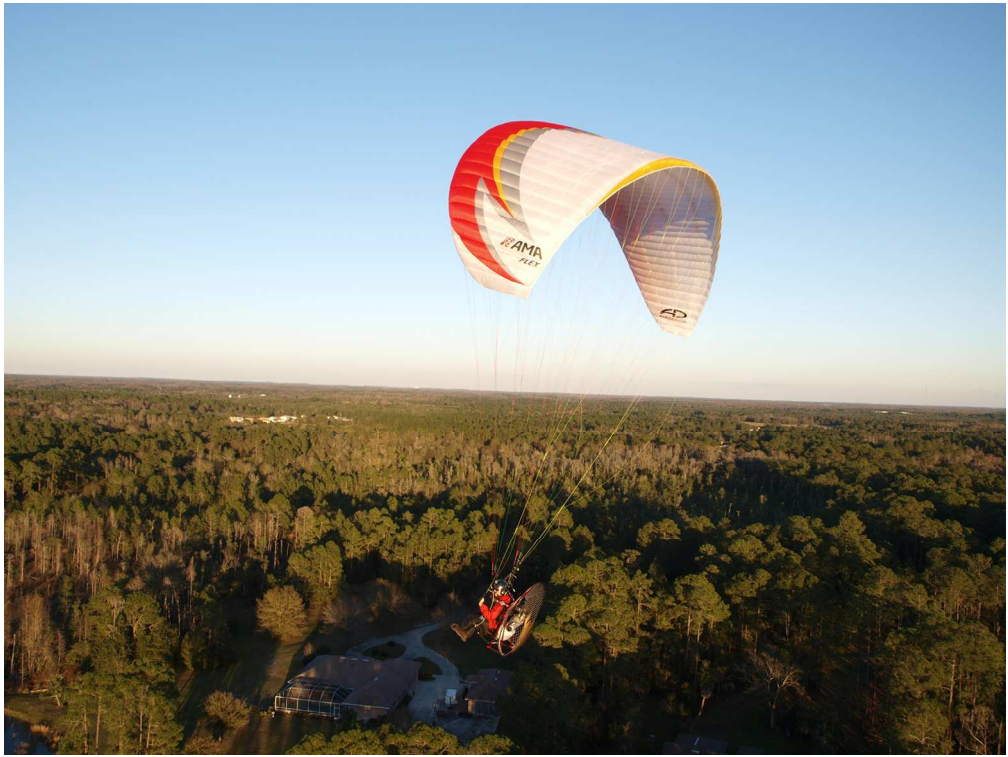

Figure 1: Paramotor in flight  
134x101mm (300 x 300 DPI)

ew only

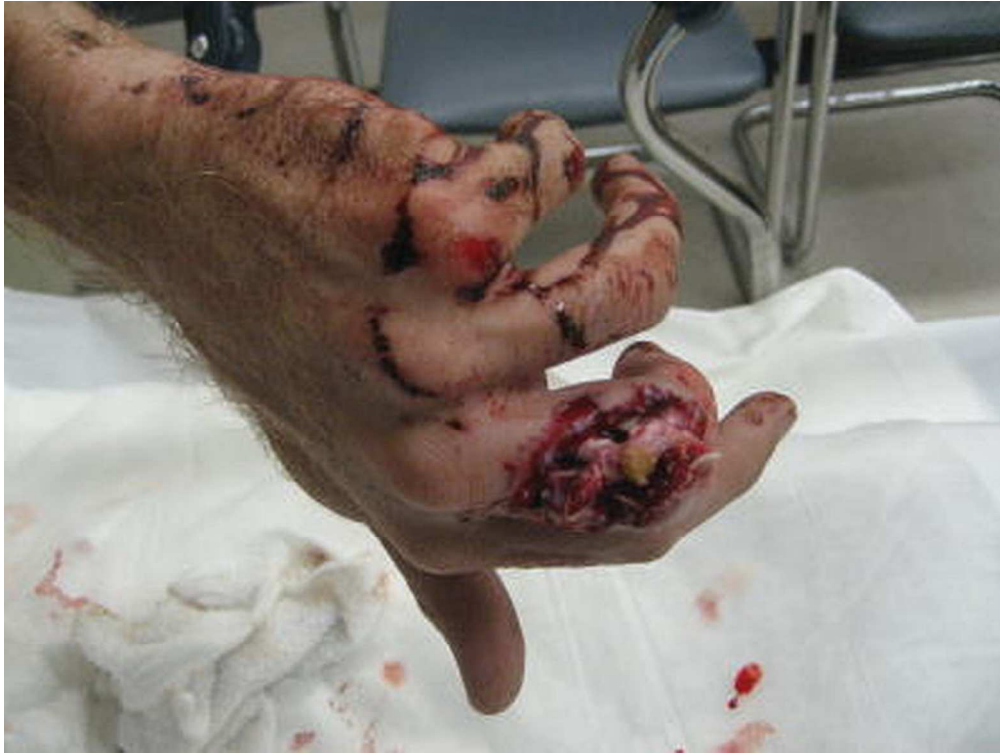

Fig. 2: Serious hand lesions caused by contact with the engine prop: these injuries are specific to powered paragliding.

90x67mm (300 x 300 DPI)

## STROBE Statement—checklist of items that should be included in reports of observational studies

|                              | Item No | Recommendation                                                                                                                                                                                                                                                                                                                                                                                                                                                                                                                                                                                                                                                                                   |
|------------------------------|---------|--------------------------------------------------------------------------------------------------------------------------------------------------------------------------------------------------------------------------------------------------------------------------------------------------------------------------------------------------------------------------------------------------------------------------------------------------------------------------------------------------------------------------------------------------------------------------------------------------------------------------------------------------------------------------------------------------|
| <b>Title and abstract</b>    | 1       | (a) Indicate the study's design with a commonly used term in the title or the abstract<br>(b) Provide in the abstract an informative and balanced summary of what was done and what was found                                                                                                                                                                                                                                                                                                                                                                                                                                                                                                    |
| <b>Yes</b>                   |         |                                                                                                                                                                                                                                                                                                                                                                                                                                                                                                                                                                                                                                                                                                  |
| <b>Introduction</b>          |         |                                                                                                                                                                                                                                                                                                                                                                                                                                                                                                                                                                                                                                                                                                  |
| Background/rationale         | 2       | Explain the scientific background and rationale for the investigation being reported                                                                                                                                                                                                                                                                                                                                                                                                                                                                                                                                                                                                             |
| <b>Yes</b>                   |         |                                                                                                                                                                                                                                                                                                                                                                                                                                                                                                                                                                                                                                                                                                  |
| Objectives                   | 3       | State specific objectives, including any prespecified hypotheses                                                                                                                                                                                                                                                                                                                                                                                                                                                                                                                                                                                                                                 |
| <b>Yes</b>                   |         |                                                                                                                                                                                                                                                                                                                                                                                                                                                                                                                                                                                                                                                                                                  |
| <b>Methods</b>               |         |                                                                                                                                                                                                                                                                                                                                                                                                                                                                                                                                                                                                                                                                                                  |
| Study design                 | 4       | Present key elements of study design early in the paper                                                                                                                                                                                                                                                                                                                                                                                                                                                                                                                                                                                                                                          |
| <b>Yes</b>                   |         |                                                                                                                                                                                                                                                                                                                                                                                                                                                                                                                                                                                                                                                                                                  |
| Setting                      | 5       | Describe the setting, locations, and relevant dates, including periods of recruitment, exposure, follow-up, and data collection                                                                                                                                                                                                                                                                                                                                                                                                                                                                                                                                                                  |
| <b>Yes</b>                   |         |                                                                                                                                                                                                                                                                                                                                                                                                                                                                                                                                                                                                                                                                                                  |
| Participants                 | 6       | (a) <i>Cohort study</i> —Give the eligibility criteria, and the sources and methods of selection of participants. Describe methods of follow-up<br><i>Case-control study</i> —Give the eligibility criteria, and the sources and methods of case ascertainment and control selection. Give the rationale for the choice of cases and controls<br><i>Cross-sectional study</i> —Give the eligibility criteria, and the sources and methods of selection of participants<br>(b) <i>Cohort study</i> —For matched studies, give matching criteria and number of exposed and unexposed<br><i>Case-control study</i> —For matched studies, give matching criteria and the number of controls per case |
| <b>Yes</b>                   |         |                                                                                                                                                                                                                                                                                                                                                                                                                                                                                                                                                                                                                                                                                                  |
| Variables                    | 7       | Clearly define all outcomes, exposures, predictors, potential confounders, and effect modifiers. Give diagnostic criteria, if applicable                                                                                                                                                                                                                                                                                                                                                                                                                                                                                                                                                         |
| <b>Yes</b>                   |         |                                                                                                                                                                                                                                                                                                                                                                                                                                                                                                                                                                                                                                                                                                  |
| Data sources/<br>measurement | 8*      | For each variable of interest, give sources of data and details of methods of assessment (measurement). Describe comparability of assessment methods if there is more than one group                                                                                                                                                                                                                                                                                                                                                                                                                                                                                                             |
| <b>Yes</b>                   |         |                                                                                                                                                                                                                                                                                                                                                                                                                                                                                                                                                                                                                                                                                                  |
| Bias                         | 9       | Describe any efforts to address potential sources of bias                                                                                                                                                                                                                                                                                                                                                                                                                                                                                                                                                                                                                                        |
| <b>Yes</b>                   |         |                                                                                                                                                                                                                                                                                                                                                                                                                                                                                                                                                                                                                                                                                                  |
| Study size                   | 10      | Explain how the study size was arrived at                                                                                                                                                                                                                                                                                                                                                                                                                                                                                                                                                                                                                                                        |
| <b>Yes</b>                   |         |                                                                                                                                                                                                                                                                                                                                                                                                                                                                                                                                                                                                                                                                                                  |
| Quantitative variables       | 11      | Explain how quantitative variables were handled in the analyses. If applicable, describe which groupings were chosen and why                                                                                                                                                                                                                                                                                                                                                                                                                                                                                                                                                                     |
| <b>Yes</b>                   |         |                                                                                                                                                                                                                                                                                                                                                                                                                                                                                                                                                                                                                                                                                                  |
| Statistical methods          | 12      | (a) Describe all statistical methods, including those used to control for confounding<br>(b) Describe any methods used to examine subgroups and interactions<br>(c) Explain how missing data were addressed<br>(d) <i>Cohort study</i> —If applicable, explain how loss to follow-up was addressed<br><i>Case-control study</i> —If applicable, explain how matching of cases and controls was addressed<br><i>Cross-sectional study</i> —If applicable, describe analytical methods taking account of sampling strategy<br>(e) Describe any sensitivity analyses                                                                                                                                |
| <b>Yes</b>                   |         |                                                                                                                                                                                                                                                                                                                                                                                                                                                                                                                                                                                                                                                                                                  |

Continued on next page

For peer review only

1  
2  
3  
4  
5  
6  
7  
8  
9  
10  
11  
12  
13  
14  
15  
16  
17  
18  
19  
20  
21  
22  
23  
24  
25  
26  
27  
28  
29  
30  
31  
32  
33  
34  
35  
36  
37  
38  
39  
40  
41  
42  
43  
44  
45  
46  
47  
48  
49  
50  
51  
52  
53  
54  
55  
56  
57  
58  
59  
60

**Results**

|                                |     |                                                                                                                                                                                                                                                                                                                                                                                                               |
|--------------------------------|-----|---------------------------------------------------------------------------------------------------------------------------------------------------------------------------------------------------------------------------------------------------------------------------------------------------------------------------------------------------------------------------------------------------------------|
| Participants<br><b>Yes</b>     | 13* | (a) Report numbers of individuals at each stage of study—eg numbers potentially eligible, examined for eligibility, confirmed eligible, included in the study, completing follow-up, and analysed<br>(b) Give reasons for non-participation at each stage<br>(c) Consider use of a flow diagram                                                                                                               |
| Descriptive data<br><b>Yes</b> | 14* | (a) Give characteristics of study participants (eg demographic, clinical, social) and information on exposures and potential confounders<br>(b) Indicate number of participants with missing data for each variable of interest<br>(c) <i>Cohort study</i> —Summarise follow-up time (eg, average and total amount)                                                                                           |
| Outcome data<br><b>Yes</b>     | 15* | <i>Cohort study</i> —Report numbers of outcome events or summary measures over time<br><i>Case-control study</i> —Report numbers in each exposure category, or summary measures of exposure<br><i>Cross-sectional study</i> —Report numbers of outcome events or summary measures                                                                                                                             |
| Main results<br><b>Yes</b>     | 16  | (a) Give unadjusted estimates and, if applicable, confounder-adjusted estimates and their precision (eg, 95% confidence interval). Make clear which confounders were adjusted for and why they were included<br>(b) Report category boundaries when continuous variables were categorized<br>(c) If relevant, consider translating estimates of relative risk into absolute risk for a meaningful time period |
| Other analyses<br><b>Yes</b>   | 17  | Report other analyses done—eg analyses of subgroups and interactions, and sensitivity analyses                                                                                                                                                                                                                                                                                                                |

**Discussion**

|                                |    |                                                                                                                                                                            |
|--------------------------------|----|----------------------------------------------------------------------------------------------------------------------------------------------------------------------------|
| Key results<br><b>Yes</b>      | 18 | Summarise key results with reference to study objectives                                                                                                                   |
| Limitations<br><b>Yes</b>      | 19 | Discuss limitations of the study, taking into account sources of potential bias or imprecision. Discuss both direction and magnitude of any potential bias                 |
| Interpretation<br><b>Yes</b>   | 20 | Give a cautious overall interpretation of results considering objectives, limitations, multiplicity of analyses, results from similar studies, and other relevant evidence |
| Generalisability<br><b>Yes</b> | 21 | Discuss the generalisability (external validity) of the study results                                                                                                      |

**Other information**

|                       |    |                                                                                                                                                               |
|-----------------------|----|---------------------------------------------------------------------------------------------------------------------------------------------------------------|
| Funding<br><b>Yes</b> | 22 | Give the source of funding and the role of the funders for the present study and, if applicable, for the original study on which the present article is based |
|-----------------------|----|---------------------------------------------------------------------------------------------------------------------------------------------------------------|

\*Give information separately for cases and controls in case-control studies and, if applicable, for exposed and unexposed groups in cohort and cross-sectional studies.

**Note:** An Explanation and Elaboration article discusses each checklist item and gives methodological background and published examples of transparent reporting. The STROBE checklist is best used in conjunction with this article (freely available on the Web sites of PLoS Medicine at <http://www.plosmedicine.org/>, Annals of Internal Medicine at <http://www.annals.org/>, and Epidemiology at <http://www.epidem.com/>). Information on the STROBE Initiative is available at [www.strobe-statement.org](http://www.strobe-statement.org).

# BMJ Open

## Accidents and injuries related to powered paragliding: a cross sectional study

|                                 |                                                                                                                                                                                                                                                           |
|---------------------------------|-----------------------------------------------------------------------------------------------------------------------------------------------------------------------------------------------------------------------------------------------------------|
| Journal:                        | <i>BMJ Open</i>                                                                                                                                                                                                                                           |
| Manuscript ID:                  | bmjopen-2014-005508.R2                                                                                                                                                                                                                                    |
| Article Type:                   | Research                                                                                                                                                                                                                                                  |
| Date Submitted by the Author:   | 24-Jul-2014                                                                                                                                                                                                                                               |
| Complete List of Authors:       | Feletti, Francesco; Ospedale S. Maria delle Croci, Presidio Ospedaliero di Ravenna, U.O.Radiologia, Ausl della Romagna, Ravenna;<br>Goin, Jeff; B.S. Aeronautical Science, Embry Riddle Aeronautical University , ; U.S. Powered Paragliding Association, |
| <b>Primary Subject Heading</b>: | Sports and exercise medicine                                                                                                                                                                                                                              |
| Secondary Subject Heading:      | Sports and exercise medicine, Emergency medicine, Radiology and imaging, Epidemiology, Occupational and environmental medicine                                                                                                                            |
| Keywords:                       | Extreme Sports, Paragliding, Sporting Injuries, Adventure Sports                                                                                                                                                                                          |
|                                 |                                                                                                                                                                                                                                                           |

SCHOLARONE™  
Manuscripts

Peer Review Only

Keywords

**Extreme Sports, Paragliding, Sporting injuries, Adventure Sports,**

**Corresponding Author**

Francesco Feletti, MD,

*Ospedale S. Maria delle Croci, Presidio Ospedaliero di Ravenna,*

*U.O.Radiologia, Ausl della Romagna,*

*Ravenna, Italy.*

*ExtremeSportMed,*

*www.extremesportmed.org;*

*e-mail: [feletti@extremesportmed.org](mailto:feletti@extremesportmed.org)*

*Phone: +39 393 123 0 456*

**Authors**

**Francesco Feletti, MD,**

*Ospedale S. Maria delle Croci, Presidio Ospedaliero di Ravenna,*

*U.O.Radiologia, Ausl della Romagna,*

*Ravenna, Italy.*

*ExtremeSportMed,*

*[www.extremesportmed.org](http://www.extremesportmed.org);*

**Jeff Goin, Capt,**

*B.S. Aeronautical Science, Embry Riddle Aeronautical University*

*Daytona Beach, Florida, United States;*



## ABSTRACT

**Objectives** - Powered paragliding is a clearly distinct sport from paragliding, mainly because of the use of an engine. We presumed that the differences between these two sports have as a result different types of injuries.

**Setting** - To test this hypothesis, we analysed 384 incident reports gathered by the United States Powered Paragliding Association from 1995 to 2012.

The majority of the incidents described occurred in the US, while 26 incidents occurred elsewhere: Canada (8), Mexico (5), Panama (1), China (1), Japan (1), Malaysia (1), Indonesia (Java)(1), Europe (8): of which Spain (1), Belgium (1), United Kingdom (3), Italy (1), Romania (1), Unknown (1).

**Outcome:** to identify the most affected body area and the most common type of injury sustained in PPG, and to highlight any differences with respect to paragliding.

**Results** - The most affected body areas in PPG were the upper limbs (44.5%) followed by the lower limbs (32 %), the back (9,8,%), the head (7%), the pelvis (3,1), the chest (2,7%) and the abdomen (0,7%) ( $p < 0,001$ ).

The engine caused 43 accidents (11.22%) in our study and was responsible for the majority of injuries to the upper limbs.

The number of fatal accidents is not lower than those which occur in paragliding and in hang-gliding.

**Conclusions** - **To help preventing the specific injuries of powered paragliding, the most appropriate equipment should be identified.**

The results of this study also suggest that in the future this sport should be analyzed separately from paragliding.

## Strengths and limitations of this study

This is the first study in literature on powered paragliding.

We analyzed a large amount of data (384 incident reports) collected from 1995 to 2012.

similar to that of paragliding, the sport from which it derives, under which the crew is suspended by means of long lines. It is a completely different sport from paragliding because the equipment used includes an engine worn on the back and held in place by a harness(Fig. 1).

In contrast to paragliding, which is practised over hilly or mountainous areas, because it requires a descent in order to take off, the PPG can take off from level ground thank to the power of the engine.

It is safer to fly over level ground because there are fewer obstacles, the thermals are not too strong and winds are generally steady.

Furthermore PPG differs from paragliding because the thrust of the engine allows the paramotor pilot to take off and fly without the need for strong winds or thermals, therefore in safer and more stable weather conditions.

Compared to other aerial sports, paragliding nevertheless remains the most similar to PPG: both require the pilot to keep the wing inflated by means of his own weight and skill.

PPG was invented in the 1980's and rapidly gained popularity, so much that various national and international competitions have been held throughout the world over the last few years.

In 2007 it was estimated that the sport was practised only in the United States, by just 3000 people [1].

It seems to be a prevalently male sport, judging from the fact that in 2013 female members of the association has been 2,6%.

As PPG has grown in popularity, the number of accidents associated with this sport has inevitably increased. Knowing the accident dynamics, the type of injuries sustained and the body area affected is of vital importance for sports medicine in order to provide an insight into the types of conduct, protective clothing and safety systems which should be adopted to improve the safety of any given sport.

A careful examination of the literature leads us to conclude that there are no existing studies on this sport in medical literature except from a case we had previously reported[2]: in a recent literature review[3], this sport is only mentioned among the variety of paragliding, to which it is usually grouped.

For peer review only - <http://bmjopen.bmj.com/site/about/guidelines.xhtml>

Given that the way of flying a paramotor is very different to that of a paraglider, we supposed that the accident and injury types differ greatly between the two sports as a result

The collection of the data started in 1995: we decided to use all the data available between 1995 and 2012(the starting date of the present study).

The collection of data was primarily thought for accidents in the U.S. but since USPPA is very popular among powered paragliders worldwide, accidents from other countries were also reported.

The forms submitted had been completed by the pilot involved, by a witness, or by the Association itself based on the information gathered.

The form included: drop-down menu lists, checklists and text fields.

The form consisted of five sections:

1-General information (date, time and place of the accident);

2-Pilot information: including demographic information and details of the pilot's PPG experience;

3-Details on the accident: including a description of the type of accident, the main cause, weather conditions at the time, characteristics of the takeoff and landing area, and details of the pilot's clothing and equipment;

4-Injury information: including the body parts affected, the seriousness of the injury, any medical assistance and possible collateral damage to people or things.

5-Narrative: an extensive description of the event and its consequences.

The form lacked a specific question about the nature of the injuries but a careful reading of the narrative section, allowed to obtain these information from almost all the forms.

When these data were missing they were named as 'unknown' in the results.

The reading of the narrative section was carried out by only one researcher.

The data published by the USPPA were public and anonymous; its use for study and publication purposes was authorised beforehand by the USPPA.

The data were analysed using descriptive statistics, using the software Wizard Pro 1.3.27 and the *chi-square* test.

The following definition of injury has been adopted: "any physical complaint sustained by an athlete that results from training or competition, irrespective of the need for medical attention or time lost from sports activities"[5-7].

We subsequently focused on the accidents resulting in injuries (disregarding those with a NACA score of 0), and we divided these into 3 classes based on the severity of the injuries:

- 1-minor (NACA I, II), usually not requiring emergency medical measures
- 2-major (NACA III, IV, V, VI), almost always requiring emergency medical measures
- 3-fatal (NACA VII).

We associated the accidents thus classified with the accident dynamics cited in the incident reports and with the phase of flight in which the accidents occurred. We also explored the correlation between injury severity and pilot rating, and between injury severity and accident dynamics.

**Results**

**At the starting date of the present study, 384 incident reports were available. One incident report had been submitted twice, therefore one copy was retained and the other was excluded.**

The pilots involved in powered paragliding accidents were aged between 24 and 72(average age= 44.5, median= 48, SD= 9.54).

The majority of the incidents described occurred in the US, while 26 incidents occurred elsewhere: Canada(8), Mexico(5), Panama(1), China(1), Japan(1), Malaysia(1), Indonesia (Java)(1), Europe (8): of which Spain(1), Belgium(1), United Kingdom(3), Italy(1), Romania(1), Unknown(1). Only three incidents involved a female pilot.

Pilot injuries were classified according to NACA category(table 1).

**Table 1.NACA Score of PPG accidents in this study**

| Category | Description                                                                                               | Pilots | %    |
|----------|-----------------------------------------------------------------------------------------------------------|--------|------|
| NACA 0   | No injury or disease.                                                                                     | 194    | 50,6 |
| NACA I   | Slight injury or illness. No acute medical intervention necessary.                                        | 59     | 15,4 |
| NACA II  | Slight to moderately heavy injury or illness. Further diagnostic examination needed or outpatient medical | 48     | 12,5 |

1  
2  
3  
4  
5  
6  
7  
8  
9  
10  
11  
12  
13  
14  
15  
16  
17  
18  
19  
20  
21  
22  
23  
24  
25  
26  
27  
28  
29  
30  
31  
32  
33  
34  
35  
36  
37  
38  
39  
40  
41  
42  
43  
44  
45  
46  
47  
48  
49

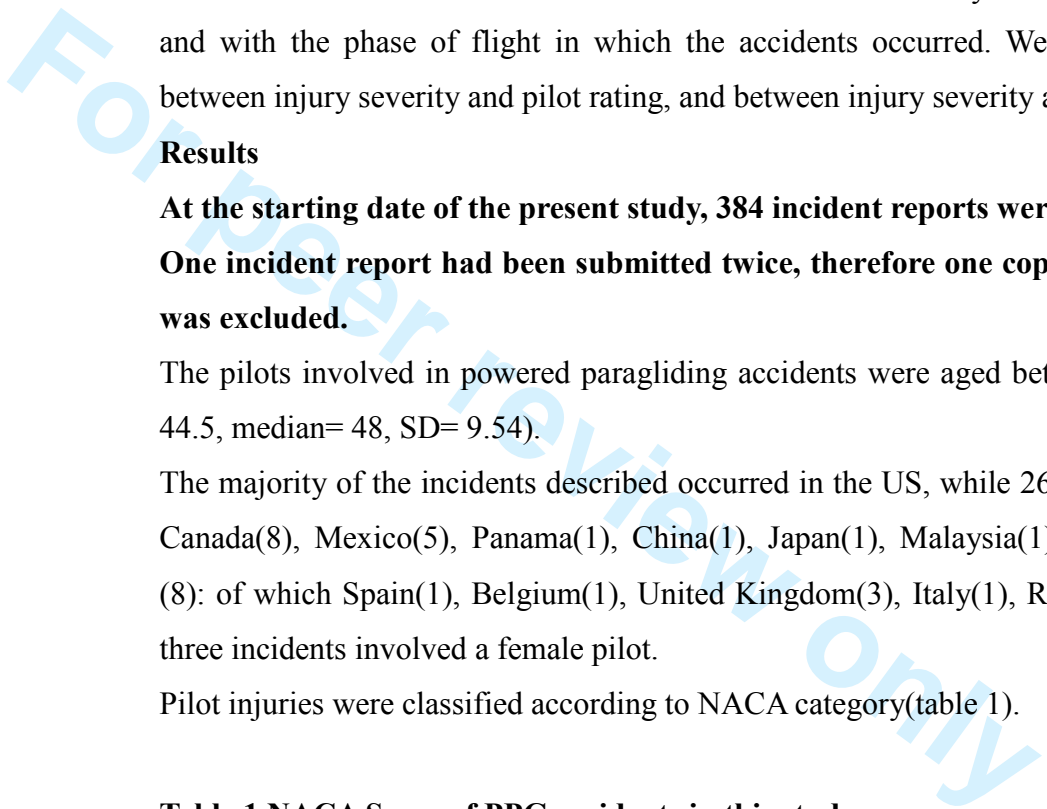

|          |                                                                                                                                           |    |     |
|----------|-------------------------------------------------------------------------------------------------------------------------------------------|----|-----|
| NACA IV  | Heavy injury or illness where rapid development into a life threatening condition can not be excluded. Emergency medical care is required | 11 | 2,9 |
| NACA V   | Acute vital (life threatening) danger                                                                                                     | 5  | 1,3 |
| NACA VI  | Breath and/or cycle stop and/or reanimation                                                                                               |    |     |
| NACA VII | Death                                                                                                                                     | 23 | 6   |

The following factors were taken into consideration: the phase of flight during which the accident took place (table 2), the primary cause (table 3) and the type of accident (table 4).

As for the experience of the pilots involved, pilot rating was distributed as follows: 25,5% PPG2 (pilots who have an experience of 40 or more flights[4]), 13,5% PPG1 (experience of 2 flights or more), 15,1% PPG3 (experience of 200 or more flights), 9,1% Instructor, 12,8% None, 11,7% Not applicable, 6% Unknown, 1,8% Other.

No statistically significant correlation was found in our sample between accident severity and pilot rating (*chi-square*,  $p = 0.044$ ).

With reference to the place where the accidents occurred, these are the following data: 70,5% flat terrain, 11,4% not applicable, 8,8% hilly terrain, 2,6% water, 2,6% mountainous terrain, 2,6% unknown data, 1,3% other.

**Table 2. Phase of Flight**

| Phase of Flight                                | Count | %     |
|------------------------------------------------|-------|-------|
| Takeoff (including inflation and runup)        | 165   | 43%   |
| Cruise                                         | 107   | 27,9% |
| Landing (including approach and after landing) | 55    | 14,3% |
| Not Available/Other                            | 56    | 14,6% |

1  
2  
3  
4  
5  
6  
7  
8  
9  
10  
11  
12  
13  
14  
15  
16  
17  
18  
19  
20  
21  
22  
23  
24  
25  
26  
27  
28  
29  
30  
31  
32  
33  
34  
35  
36  
37  
38  
39  
40  
41  
42  
43  
44  
45  
46  
47  
48  
49

| exhaustion)                                                     | BMJ Open |    |     |
|-----------------------------------------------------------------|----------|----|-----|
| Pilot Error & Weather                                           |          | 17 | 4,4 |
| Pilot Error & Mechanical Failure                                |          | 17 | 4,4 |
| <b>Weather (Gust, Thermal, Rain, Wind increase, etc..).</b>     |          | 22 | 5,7 |
| <b>Not Applicable/unknown</b>                                   |          | 24 | 4,4 |
| <b>Other (including wake Turbulence, Tight takeoff/LZ Area)</b> |          | 31 | 1,8 |

Table 4. Type of Accidents

| Type                                                | Tot. | %    |
|-----------------------------------------------------|------|------|
| <b>Collision with Terrain/Obstruction on Ground</b> | 76   | 19,8 |
| <b>Powerplant Equipment Malfunction</b>             | 58   | 15,1 |
| <b>Body contact with spinning prop</b>              | 43   | 11,2 |
| <b>Hard Landing</b>                                 | 40   | 10,4 |
| <b>Fall</b>                                         | 37   | 9,7  |
| <b>Wing Malfunction or Deflation</b>                | 35   | 9,1  |
| <b>Other</b>                                        | 29   | 7,5  |
| <b>Handling</b>                                     | 20   | 5,2  |
| <b>Line Tangle/Damage</b>                           | 15   | 3,9  |
| <b>Collision with other Aircraft/Ultralight</b>     | 14   | 3,6  |
| <b>Water Immersion</b>                              | 10   | 2,6  |
| <b>Other/Not Applicable</b>                         | 35   | 1,5  |

To identify the most affected body areas and therefore most critical areas for the development of protective clothing, we calculated the number of injuries sustained in each body area (table 5). On a total of 256 injuries, the most affected body areas were the upper limbs(44.5%) followed by the lower limbs(32 %) and the back(9,7 %).

For peer review only: <http://bmjopen.bmj.com/site/about/guidelines.xhtml>

Table 5. Distribution of the Injuries sustained in the different Body Regions in Powered

|                   |          |    |                                                                                                                                                                                                |     |       |
|-------------------|----------|----|------------------------------------------------------------------------------------------------------------------------------------------------------------------------------------------------|-----|-------|
|                   | Neck     | 3  | open wounds(1)<br><b>BMJ Open</b><br>Burnings(1), C2 fracture(1), unknown(1)                                                                                                                   |     |       |
|                   | Face     | 8  | Fractures(4>), lacerations(2), burnings(1), other(1)                                                                                                                                           |     |       |
| <b>Chest</b>      | Chest    | 7  | Rib fractures(2), abrasions(1), burnings(1), contusions(1), open wounds (1), unkown(1)                                                                                                         | 7   | 2.7%  |
| <b>Upper Limb</b> | Shoulder | 32 | Fractures(6), open wounds(5), bruising(4), other(3),tendon injuries (3),dislocations (2),lacerations (2),unknown (2),abrasions (1),burnings (1),contusions (1),muscle strains (1), sprains (1) | 114 | 44.5% |
|                   | Arm      | 26 | Lacerations(7), burnings(5), contusions(3), fractures(3), unknown(3), open wounds(2), tendon rupture(1), abrasions(1), sprains(1)                                                              |     |       |
|                   | Forearm  | 11 | Burnings(2), lacerations(2), fractures(2), unknown(2), contusions(1) open wounds(1), soft tissue injuries(1)                                                                                   |     |       |
|                   | Wrist    | 8  | Fractures(3), contusions(2), lacerations(1), other(1), sprains(1)                                                                                                                              |     |       |
|                   | Elbow    | 5  | Open wounds(2), abrasions(1), burnings(1), unknown(1)                                                                                                                                          |     |       |
|                   | Hand     | 32 | Fractures(17; 11 with amputation), open wounds(6), lacerations(3), contusion(2), muscle strains(1), other(1), sprains(1), unknown(1)                                                           |     |       |
| <b>Abdomen</b>    | Abdomen  | 2  | Contusion(1), soft tissue(1) ,                                                                                                                                                                 | 2   | 0.7%  |
| <b>Back</b>       | Back     | 25 | Fractures(8), unknown(8), other(3), contusions(2), abrasions(1), burnings(1), muscle strains(1), open wounds(1)                                                                                | 25  | 9.7%  |
| <b>Pelvis</b>     | Pelvis   | 8  | Fractures(4), contusion(1), internal bruising(1), muscle strain(1), other(1)                                                                                                                   | 8   | 3.1%  |
| <b>Lower Limb</b> | Thigh    | 13 | Fractures(4), contusions(2), lacerations(2), open wounds(2), abrasion (1), burnings(1), unknown(1)                                                                                             | 82  | 32%   |
|                   | Knee     | 19 | Contusions(4), sprains(4), lacerations(2), ligament ruptures(2), unknown(2), abrasions(1), dislocations(1), meniscus and ligament tears(1), muscle strains(1), others(1)                       |     |       |
|                   | Calf     | 17 | Fractures(7), burnings(2), contusions(2), lacerations(2), unknown(2), wounds(2)                                                                                                                |     |       |
|                   | Ankle    | 22 | Sprains(8), fractures(5), contusions(3), unknown(3), dislocations(1), ligament ruptures(1), other(1)                                                                                           |     |       |
|                   | Foot     | 11 | Fracture(3), unknown(3), contusions(2), other(2), lacerations(1)                                                                                                                               |     |       |

For peer review only - <http://bmjopen.bmj.com/site/about/guidelines.xhtml>

Of the twenty-three fatal accidents, five were the result of an involuntary landing on water and

...

1  
2  
3  
4  
5  
6  
7  
8  
9  
10  
11  
12  
13  
14  
15  
16  
17  
18  
19  
20  
21  
22  
23  
24  
25  
26  
27  
28  
29  
30  
31  
32  
33  
34  
35  
36  
37  
38  
39  
40  
41  
42  
43  
44  
45  
46  
47  
48  
49

Most of the injuries were minor ones(NACA I-II) followed by major ones(NACA III-VI) and fatalities(NACA VII).

No significant difference in the distribution of fatal, major and minor injuries among the three main phases of flight(takeoff including inflation and runup, cruise and landing including approach) was found.

**With regard to the relationship between accident dynamic and accident severity,**

**Accidents due to body contact with spinning prop and wing malfunction/deflation caused prevalently major injuries (NACA III-VI): 55,6% and 56,2% respectively.**

**Accidents due to water immersion were prevalently fatal (71,4%).**

**The other dynamics of injuries cause mainly minor injuries(NACA I-II).**

A statistical correlation between injury severity and type of accident was found(*chi-square*,  $p < 0.021$ ; confidence 95%); severity of injuries by type of accident is shown in Table 6.

**Table 6. Severity of Injuries by Type of Accident**

| Type of Accident                             | Minor (%)   | Major (%)   | Fatal (%)   |
|----------------------------------------------|-------------|-------------|-------------|
| Collision with Terrain/Obstruction on Ground | 62,5        | 18,8        | 18,8        |
| Powerplant Equipment Malfunction             | 100         | 0           | 0           |
| Body contact with spinning prop              | 44,4        | 55,6        | 0           |
| Hard Landing                                 | 74,1        | 22,2        | 3,7         |
| Fall                                         | 54,5        | 40,9        | 4,5         |
| Wing Malfunction or Deflation                | 31,2        | 56,2        | 12,5        |
| Other                                        | 80          | 0           | 20          |
| Handling                                     | 53,8        | 23,1        | 23,1        |
| Line Tangle/Damage                           | 100         | 0           | 0           |
| Collision with other Aircraft/Ultralight     | 40          | 40          | 20          |
| Water Immersion                              | 14,3        | 14,3        | 71,4        |
| <b>All Types of Accident</b>                 | <b>56,6</b> | <b>31,2</b> | <b>12,2</b> |

The correlation between accident severity and pilot rating is scarcely significant(*chi-square*,



1  
2  
3  
4  
5  
6  
7  
8  
9  
10  
11  
12  
13  
14  
15  
16  
17  
18  
19  
20  
21  
22  
23  
24  
25  
26  
27  
28  
29  
30  
31  
32  
33  
34  
35  
36  
37  
38  
39  
40  
41  
42  
43  
44  
45  
46  
47  
48  
49

In our study, the weather conditions were a main or contributing cause of 10,1% of accidents: weather conditions alone were the cause of 5.7% of accidents, while the weather conditions contributed to the accident together with pilot error in 4.4% of accidents. This figure is much lower than that reported in paragliding by Zeller[9], who mentions adverse weather conditions as a cause in 19% of paragliding accidents.

This can be explained by the fact that engine allows to fly frequently and in a much wider variety of weather conditions, so pilots are less likely to risk flying in extreme and hazardous conditions.

Nevertheless, our study clearly shows that the use of an engine influences the accident dynamics.

It can itself be the cause of accidents, it can be an important aggravating factor in the event of an accident or it can also be the direct cause of injuries.

Our study data showed that the majority of accidents occurred during takeoff(32.9%, or 43% if we include those during run-up and inflation, phases which can be considered an integral part of takeoff with a paramotor), while in paragliding, the most dangerous phase is landing[3,9].

This can be explained by the fact that takeoff with a PPG requires a delicate balance between the thrust of the engine, the weight of the crew and the lift of the wing. Additionally, the takeoff from level ground and the prevalently horizontal thrust of the engine results in the pilot moving away from the ground slowly, as opposed to paragliding, where the distance from the ground increases rapidly due to taking off from a slope.

As a result, falling distance remains reduced for much longer during takeoff with a PPG than it does with a P, limiting the possibility of adopting emergency manoeuvres and making the use of an emergency parachute impossible.

The use of an engine can be the direct cause of accidents distinctive to PPG: the two causes listed as “fuel exhaustion” and “mechanical failure: power-plant/propeller” were responsible for 14% of accidents.

The engine may also aggravate the accident, mainly due to the energy it produces and transmits to the crew, but also because of its weight. It is mounted on a special frame worn by the pilot: the

overall weight of the equipment and accompanying power-plant, vary between 20 and 40 kg. In the case of collision, both of these factors synergize to make the impact more traumatic given that

engine displacement varies between 80cc and 250cc and engine power varies between 11 to

mental confusion suffered by the pilot during the execution of acrobatic stunts.

Steep spirals are extremely dangerous manoeuvres in PPG; the position of the crew and the centrifugal acceleration (increased by the thrust of the engine) may reduce blood supply to the brain, and could cause momentary state of mental confusion or even blackouts at a time when the maximum level of attention is required[10].

In the case of immersion in water, the weight of the engine can drag the pilot rapidly under the surface, without giving him time to free himself from the equipment, making this type of accident particularly feared among paramotor pilots. In our study, this dynamic was responsible for 21.7 % of fatal accidents(71.4% of accidents involving water immersion were fatal) and a serious (non-fatal) case of near-drowning. It is therefore inadvisable to fly a paramotor over or near water; it is essential that pilots, wishing to do so, adopt the use of self-inflating and specially designed safety systems.

These auto-inflating flotation devices are mounted on a paramotor's frame and are activated by a CO2 cartridge which fires upon submersion: so no pilot input is required.

Paragliding injuries mainly involve lower limbs and spine [3, 9-17] while in PPG the upper limbs are more frequently affected and spinal injuries are less common.

The different injury distribution may depend in part on the different flight dynamics and different distribution of the forces acting on the crew. This is due to the thrust of the engine and the weight of the equipment.

The engine is undoubtedly the factor which distinguishes PPG from paragliding in terms of injury type; contact with the propeller caused 43 accidents (11.22%) in our study and was responsible for the majority of injuries to the upper limbs, in particular lesions to the hands (Fig. 2), wrists, forearms, arms and shoulders, as well as all eleven fractures with loss of fingers cited in this study. Contact with very hot engine parts was the cause of four cases of burnings to the face, neck, back, shoulder, arm, elbow, forearm, calf, thigh and ankle, while two cases of generalised burnings were the result of actual fires caused by combustion of the engine fuel. In another case, electrical burnings to the chest and one arm were sustained following collision with high voltage power lines.

Contact with power lines is an established cause of accidents in paragliding too, while burnings resulting from engine fuel combustion or contact with the engine are specific to PPG.

Indeed PPG is widely believed to be safer than paragliding, and fatal events considered to be

| Sport        | Study                            | No. fatalities | No. participants | % Fatal events |
|--------------|----------------------------------|----------------|------------------|----------------|
| Paragliding  | Krüger-Franke et al. (1991)[11]. | 2              | 218              | 0.91%          |
| Paragliding  | Schulze et al. (2002)[18].       | 25             | 409              | 6.10%          |
| Paragliding  | Lautenschlager et al. [19]       | 1              | 86               | 1,16%          |
| Paragliding  | Fashing et al. (1997)[12]        | 0              | 70               | 0.00%          |
| Hang-gliding | Foray et al (1991)[20].          | 7              | 200              | 3.50%          |

Considering the differences between PPG and paragliding further research on this sport and related injuries should be conducted separately from paragliding, in separate studies.

The results of this study suggest that further investigation should consider if the use of certain types of safety clothing and equipment can significantly reduce various risks specific to this sport.

The effectiveness of protective gloves to protect against hand injuries caused by contact with the spinning prop should be evaluated in future studies.

Since many prop strike injuries have been higher on the upper limb where gloves would not be effective, an even better solution could be to add the so called "safety ring" to the engine cage. The safety ring is an aluminum ring that mounts just forward the radial arms with the same radius as the prop. The safety ring is designed to make it difficult for an open human hand to reach the prop at full rated thrust and it adds very little in terms of expense, and weight to the equipment.

Further studies should evaluate its effectiveness and its use could eventually be made obligatory, given that these injuries are often severe, in some cases involving amputation of the fingers. Given the extreme danger caused by water immersion, it might be useful that pilots provide themselves with an auto-inflating flotation device when flying near water. As in paragliding, periodical checking and maintenance of equipment (the wing and lines in particular) is essential. Additionally, in PPG, careful inspection and maintenance of the engine is vital, given that its malfunctioning could represent a cause of major injuries.

This study has some limitations.

For peer review only - <http://bmjopen.bmj.com/site/about/guidelines.xhtml>

First of all since there is no way of finding out exactly how many people knew about the existence of the database. the effect of under-reporting bias. due to the voluntary nature of our data

to the loss of some data even if in almost all the cases it was possible to obtain detailed information on the type of injuries by a careful reading of the narrative section of the reports.

### Conclusions

This study reveals a pattern of accidents in PPG clearly different from that of paragliding: PPG accidents are more common during takeoff; weather and wind conditions have a lesser influence in causing accidents, the energy from the engine and the weight of the equipment may aggravate accidents.

The pattern of injuries sustained in this sport are distinctive: mostly involving the upper limbs, while those to the spine are less common. Finally, contrary to the belief held up to now by the experts of this sport[1], the number of fatal accidents/number of accidents is not lower than those which occur in paragliding and in hang-gliding[11, 12, 18, 19, 20](table 7).

For these reasons, PPG should be analysed separately from paragliding in distinct studies.

Further research will be useful to confirm the data of this study, to investigate the role of safety equipment such as protective gloves, safety ring and auto-inflating flotation devices and to evaluate the effectiveness of periodical checks of the engine, to reduce certain risks specific to this sport.

### Contributorship Statement

The study was conceived by Francesco Feletti and Jeff Goin.

Jeff Goin collected data.

Francesco Feletti carried out statistical analysis and wrote the draft of the manuscript. All authors contributed to critical revisions of the manuscript and approved the final version.

**Data sharing statement:** No additional data available.

**Competing interests:** None.

### Funding statement

The authors received no funding for this research

### REFERENCES

For peer review only - <http://bmjopen.bmj.com/site/about/guidelines.xhtml>

[1] Footflyer- The source for powered paragliding information.

[http://www.footflyer.com/Safety/Incidents/incidents\\_and\\_analysis.htm](http://www.footflyer.com/Safety/Incidents/incidents_and_analysis.htm) [Oct 2013]

[5] Fuller CW, Ekstrand J, Junge A, et al. Consensus statement on injury definitions and data collection procedures in studies of football(soccer) injuries. Clin J Sport Med. 2006; 16(2): 83-92.

[6] Fuller CW, Ekstrand J, Junge A, et al. Consensus statement on injury definitions and data collection procedures in studies of football(soccer) injuries. Scand J Med Sci Sports 2006;16 (2) 83-92.

[7] Fuller CW, Ekstrand J, Junge A, et al. Consensus statement on injury definitions and data collection procedures in studies of football(soccer) injuries. Clin J Sport Med. 2006; 40(3): 193-201.

[8] Lackner CK, Schlechtriemen T, Burghofer K, et al. The Munich NACA score: Modification of the NACA score for preclinical emergency medicine. *Notfall und Rettungsmedizin* 2005, 8(2):109-111.

[9] Zeller T, Billing A, Lob G. Injuries in paragliding. Int Orthop. 1992;16(3): 255-9.

[10] Schneider S, Abein V, Askew CD, et al. Changes in cerebral oxygenation during parabolic flight. Eur J Appl Physiol 2013 ; 113 (6): 1617-23.

[11] Krüger-Franke M, Siebert CH, Pfürringer W. Paragliding injuries. Br J Sports Med 1991; 25(2): 98-101.

[12] Fasching G, Schippinger G, Pretschner R. Paragliding accidents in remote areas. 1997 Aug;8(3):129-33.

[13] Rekand T, Schaanning EE, Varga V, et al. Spinal cord injuries among paragliders in Norway. Spinal Cord. 2008; 46(6): 412-16.

[14] Hasler RM, Hüttner HE, Keel MJ, et al. Spinal and pelvic injuries in airborne sports: a retrospective analysis from a major Swiss trauma centre. Injury. 2012; 43(4): 440-5.

[15] Exadaktylos AK, Scwabas G, Eggli S, et al. Paragliding accidents--the spine is at risk. A study from a Swiss Trauma Centre. Eur J Emerg Med. 2003; 10(1): 27-9.

[16] Gauler R, Moulin P, Koch HG, et al. Paragliding accidents with spinal cord injury: 10 years' experience at a single institution. Spine. 2006; 31(10): 1125-30.

[17] Laver L, Mei Dan O. Paragliding. In Mei Dan O, Carmont M. Adventure and Extreme Sports Injuries. Springer-Verlag London 2013; 12: 247-272.

[18] Schulze W, Richter J, Schulze B, et al. Injury prophylaxis in paragliding. Br J Sports Med

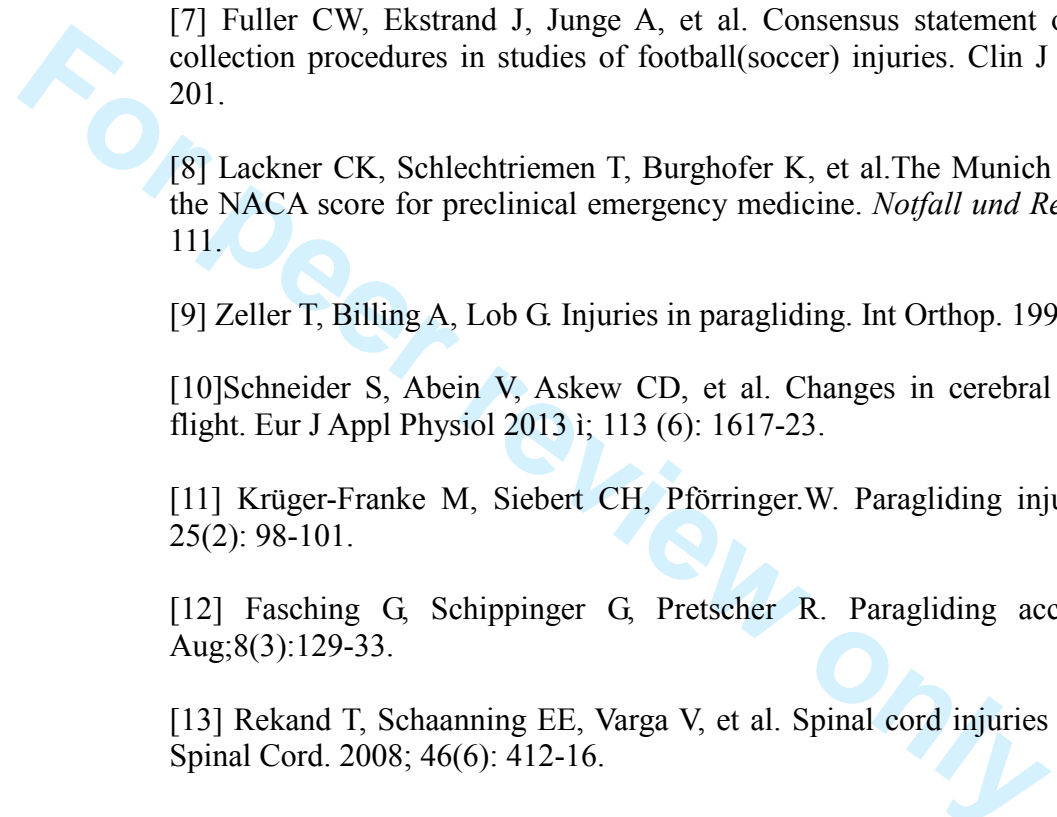

**FIGURE LEGENDS**

Fig. 1: Paramotor in flight

Fig. 2: Serious hand lesions caused by contact with the engine prop: these injuries are specific to powered paragliding.

For peer review only

1  
2  
3  
4  
5  
6  
7  
8  
9  
10  
11  
12  
13  
14  
15  
16  
17  
18  
19  
20  
21  
22  
23  
24  
25  
26  
27  
28  
29  
30  
31  
32  
33  
34  
35  
36  
37  
38  
39  
40  
41  
42  
43  
44  
45  
46  
47  
48  
49

Keywords

**Extreme Sports, Paragliding, Sporting injuries, Adventure Sports,**

**Corresponding Author**

Francesco Feletti, MD,

*Ospedale S. Maria delle Croci, Presidio Ospedaliero di Ravenna,*

*U.O.Radiologia, Ausl della Romagna,*

*Ravenna, Italy.*

*ExtremeSportMed,*

*www.extremesportmed.org;*

*e-mail: [feletti@extremesportmed.org](mailto:feletti@extremesportmed.org)*

*Phone: +39 393 123 0 456*

**Authors**

**Francesco Feletti, MD,**

*Ospedale S. Maria delle Croci, Presidio Ospedaliero di Ravenna,*

*U.O.Radiologia, Ausl della Romagna,*

*Ravenna, Italy.*

*ExtremeSportMed,*

*[www.extremesportmed.org](http://www.extremesportmed.org);*

**Jeff Goin, Capt,**

*B.S. Aeronautical Science, Embry Riddle Aeronautical University*

*Daytona Beach, Florida, United States;*

**ABSTRACT**

**Objectives** - Powered paragliding is a clearly distinct sport from paragliding, mainly because of the use of an engine. We **presumed** that the differences between these two sports **have as a result** different types of injuries.

**Setting** - To test this hypothesis, we analysed 384 incident reports gathered by the United States Powered Paragliding Association from 1995 to 2012.

The majority of the incidents described occurred in the US, while 26 incidents occurred elsewhere: Canada (8), Mexico (5), Panama (1), China (1), Japan (1), Malaysia (1), Indonesia (Java)(1), Europe (8): of which Spain (1), Belgium (1), United Kingdom (3), Italy (1), Romania (1), Unknown (1).

**Outcome:** to identify the most affected body area and the most common type of injury sustained in PPG, and to highlight any differences with respect to paragliding.

**Results** - The most affected body areas in PPG were the upper limbs (44.5%) followed by the lower limbs (32 %), the back (9,8,%), the head (7%), the pelvis (3,1), the chest (2,7%) and the abdomen (0,7%) ( $p < 0,001$ ).

The engine caused 43 accidents (11.22%) in our study and was responsible for the majority of injuries to the upper limbs.

The number of fatal accidents is not lower than those which occur in paragliding and in hang-gliding.

**Conclusions** - To help **preventing** the specific injuries of powered paragliding, the most appropriate equipment should be identified.

The results of this study also suggest that in the future this sport should be analyzed separately from paragliding.

**Strengths and limitations of this study**

This is the first study in literature on powered paragliding.

We analyzed a large amount of data (384 incident reports) collected from 1995 to 2012.



1  
2  
3  
4  
5  
6  
7  
8  
9  
10  
11  
12  
13  
14  
15  
16  
17  
18  
19  
20  
21  
22  
23  
24  
25  
26  
27  
28  
29  
30  
31  
32  
33  
34  
35  
36  
37  
38  
39  
40  
41  
42  
43  
44  
45  
46  
47  
48  
49

similar to that of paragliding, the sport from which it derives, under which the crew is suspended by means of long lines. It is a completely different sport from paragliding because the equipment used includes an engine worn on the back and held in place by a harness(Fig. 1).

In contrast to paragliding, which is practised over hilly or mountainous areas, because it requires a descent in order to take off, the PPG can take off from level ground thank to the power of the engine.

It is safer to fly over level ground because there are fewer obstacles, the thermals are not too strong and winds are generally steady.

Furthermore PPG differs from paragliding because the thrust of the engine allows the paramotor pilot to take off and fly without the need for strong winds or thermals, therefore in safer and more stable weather conditions.

Compared to other aerial sports, paragliding nevertheless remains the most similar to PPG: both require the pilot to keep the wing inflated by means of his own weight and skill.

PPG was invented in the 1980's and rapidly gained popularity, so much that various national and international competitions have been held throughout the world over the last few years.

In 2007 it was estimated that the sport was practised only in the United States, by just 3000 people [1].

It seems to be a prevalently male sport, judging from the fact that in 2013 female members of the association has been 2,6%.

As PPG has grown in popularity, the number of accidents associated with this sport has inevitably increased. Knowing the accident dynamics, the type of injuries sustained and the body area affected is of vital importance for sports medicine in order to provide an insight into the types of conduct, protective clothing and safety systems which should be adopted to improve the safety of any given sport.

A careful examination of the literature leads us to conclude that there are no existing studies on this sport in medical literature except from a case we had previously reported[2]: in a recent literature review[3], this sport is only mentioned among the variety of paragliding, to which it is usually grouped.

Given that the way of flying a paramotor is very different to that of a paraglider, we supposed that the accident and injury types differ greatly between the two sports as a result

the US Powered Paragliding Association (USPPA) collected using a specific form published on its website[4].

The collection of the data started in 1995: we decided to use all the data available between 1995 and 2012 (the starting date of the present study).

The collection of data was primarily thought for accidents in the U.S. but since USPPA is very popular among powered paragliders worldwide, accidents from other countries were also reported.

The forms submitted had been completed by the pilot involved, by a witness, or by the Association itself based on the information gathered.

The form included: drop-down menu lists, checklists and text fields.

The form consisted of five sections:

1-General information (date, time and place of the accident);

2-Pilot information: including demographic information and details of the pilot's PPG experience;

3-Details on the accident: including a description of the type of accident, the main cause, weather conditions at the time, characteristics of the takeoff and landing area, and details of the pilot's clothing and equipment;

4-Injury information: including the body parts affected, the seriousness of the injury, any medical assistance and possible collateral damage to people or things.

5-Narrative: an extensive description of the event and its consequences.

The form lacked a specific question about the nature of the injuries but a careful reading of the narrative section, allowed to obtain these information from almost all the forms.

When these data were missing they were named as 'unknown' in the results.

The reading of the narrative section was carried out by only one researcher.

The data published by the USPPA were public and anonymous; its use for study and publication purposes was authorised beforehand by the USPPA.

The data were analysed using descriptive statistics, using the software Wizard Pro 1.3.27 and the *chi-square* test.

The following definition of injury has been adopted: "any physical complaint sustained by an athlete that results from training or competition, irrespective of the need for medical attention or time lost from sports activities"[5-7].

Each incident report was also given a NACA (National Advisory Committee of Aeronautics) Score:

We subsequently focused on the accidents resulting in injuries (disregarding those with a NACA score of 0), and we divided these into 3 classes based on the severity of the injuries:

1-minor (NACA I, II), usually not requiring emergency medical measures

2-major (NACA III, IV, V, VI), almost always requiring emergency medical measures

3-fatal (NACA VII).

We associated the accidents thus classified with the accident dynamics cited in the incident reports and with the phase of flight in which the accidents occurred. We also explored the correlation between injury severity and pilot rating, and between injury severity and accident dynamics.

### Results

**At the starting date of the present study, 384 incident reports were available.**

**One incident report had been submitted twice, therefore one copy was retained and the other was excluded.**

The pilots involved in powered paragliding accidents were aged between 24 and 72 (average age= 44.5, median= 48, SD= 9.54).

The majority of the incidents described occurred in the US, while 26 incidents occurred elsewhere: Canada(8), Mexico(5), Panama(1), China(1), Japan(1), Malaysia(1), Indonesia (Java)(1), Europe (8): of which Spain(1), Belgium(1), United Kingdom(3), Italy(1), Romania(1), Unknown(1). Only three incidents involved a female pilot.

Pilot injuries were classified according to NACA category (table 1).

**Table 1. NACA Score of PPG accidents in this study**

| Category | Description                                                                                               | Pilots | %    |
|----------|-----------------------------------------------------------------------------------------------------------|--------|------|
| NACA 0   | No injury or disease.                                                                                     | 194    | 50,6 |
| NACA I   | Slight injury or illness. No acute medical intervention necessary.                                        | 59     | 15,4 |
| NACA II  | Slight to moderately heavy injury or illness. Further diagnostic examination needed or outpatient medical | 48     | 12,5 |

1  
2  
3  
4  
5  
6  
7  
8  
9  
10  
11  
12  
13  
14  
15  
16  
17  
18  
19  
20  
21  
22  
23  
24  
25  
26  
27  
28  
29  
30  
31  
32  
33  
34  
35  
36  
37  
38  
39  
40  
41  
42  
43  
44  
45  
46  
47  
48  
49

|          |                                                                                                                                           |    |     |
|----------|-------------------------------------------------------------------------------------------------------------------------------------------|----|-----|
| NACA IV  | Heavy injury or illness where rapid development into a life threatening condition can not be excluded. Emergency medical care is required | 11 | 2,9 |
| NACA V   | Acute vital (life threatening) danger                                                                                                     | 5  | 1,3 |
| NACA VI  | Breath and/or cycle stop and/or reanimation                                                                                               |    |     |
| NACA VII | Death                                                                                                                                     | 23 | 6   |

The following factors were taken into consideration:, the phase of flight during which the accident took place(table 2), the primary cause(table 3) and the type of accident(table 4).

As for the experience of the pilots involved, pilot rating was distributed as follows: 25,5% PPG2 (pilots who have an experience of 40 or more flights[4]), 13,5% PPG1(experience of 2 flights or more), 15,1% PPG3(experience of 200 or more flights), 9,1% Instructor, 12,8% None, 11,7% Not applicable, 6% Unknown, 1,8% Other.

No statistically significant correlation was found in our sample between accident severity and pilot rating(*chi-square*, p= 0.044).

With reference to the place where the accidents occurred, these are the following data: 70,5% flat terrain, 11,4% not applicable, 8,8% hilly terrain, 2,6% water, 2,6 % mountainous terrain, 2,6% unknown data, 1,3% other.

**Table 2. Phase of Flight**

| Phase of Flight                                | Count | %     |
|------------------------------------------------|-------|-------|
| Takeoff (including inflation and runup)        | 165   | 43%   |
| Cruise                                         | 107   | 27,9% |
| Landing (including approach and after landing) | 55    | 14,3% |
| Not Available/Other                            | 56    | 14,6% |

| <b>exhaustion)</b>                                              | <b>BMJ Open</b> |    |     |
|-----------------------------------------------------------------|-----------------|----|-----|
| Pilot Error & Weather                                           |                 | 17 | 4,4 |
| Pilot Error & Mechanical Failure                                |                 | 17 | 4,4 |
| <b>Weather (Gust, Thermal, Rain, Wind increase, etc.).</b>      |                 | 22 | 5,7 |
| <b>Not Applicable/unknown</b>                                   |                 | 24 | 4,4 |
| <b>Other (including wake Turbulence, Tight takeoff/LZ Area)</b> |                 | 31 | 1,8 |

Table 4. Type of Accidents

| <b>Type</b>                                         | <b>Tot.</b> | <b>%</b> |
|-----------------------------------------------------|-------------|----------|
| <b>Collision with Terrain/Obstruction on Ground</b> | 76          | 19,8     |
| <b>Powerplant Equipment Malfunction</b>             | 58          | 15,1     |
| <b>Body contact with spinning prop</b>              | 43          | 11,2     |
| <b>Hard Landing</b>                                 | 40          | 10,4     |
| <b>Fall</b>                                         | 37          | 9,7      |
| <b>Wing Malfunction or Deflation</b>                | 35          | 9,1      |
| <b>Other</b>                                        | 29          | 7,5      |
| <b>Handling</b>                                     | 20          | 5,2      |
| <b>Line Tangle/Damage</b>                           | 15          | 3,9      |
| <b>Collision with other Aircraft/Ultralight</b>     | 14          | 3,6      |
| <b>Water Immersion</b>                              | 10          | 2,6      |
| <b>Other/Not Applicable</b>                         | 35          | 1,5      |

To identify the most affected body areas and therefore most critical areas for the development of protective clothing, we calculated the number of injuries sustained in each body area (table 5). On a total of 256 injuries, the most affected body areas were the upper limbs(44.5%) followed by the lower limbs(32 %) and the back(9,7 %).

For peer review only, <http://bmjopen.bmj.com/site/about/guidelines.xhtml>

Table 5. Distribution of the Injuries sustained in the different Body Regions in Powered

1  
2  
3  
4  
5  
6  
7  
8  
9  
10  
11  
12  
13  
14  
15  
16  
17  
18  
19  
20  
21  
22  
23  
24  
25  
26  
27  
28  
29  
30  
31  
32  
33  
34  
35  
36  
37  
38  
39  
40  
41  
42  
43  
44  
45  
46  
47  
48  
49

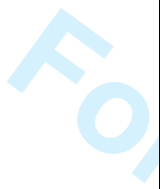

|                   |          |    |                                                                                                                                                                                                |     |       |
|-------------------|----------|----|------------------------------------------------------------------------------------------------------------------------------------------------------------------------------------------------|-----|-------|
|                   | Neck     | 3  | open wounds(1)<br><b>BMJ Open</b><br>Burnings(1), C2 fracture(1), unknown(1)                                                                                                                   |     |       |
|                   | Face     | 8  | Fractures(4>), lacerations(2), burnings(1), other(1)                                                                                                                                           |     |       |
| <b>Chest</b>      | Chest    | 7  | Rib fractures(2), abrasions(1), burnings(1), contusions(1), open wounds (1), unkown(1)                                                                                                         | 7   | 2.7%  |
| <b>Upper Limb</b> | Shoulder | 32 | Fractures(6), open wounds(5), bruising(4), other(3),tendon injuries (3),dislocations (2),lacerations (2),unknown (2),abrasions (1),burnings (1),contusions (1),muscle strains (1), sprains (1) | 114 | 44.5% |
|                   | Arm      | 26 | Lacerations(7), burnings(5), contusions(3), fractures(3), unknown(3), open wounds(2), tendon rupture(1), abrasions(1), sprains(1)                                                              |     |       |
|                   | Forearm  | 11 | Burnings(2), lacerations(2), fractures(2), unknown(2), contusions(1) open wounds(1), soft tissue injuries(1)                                                                                   |     |       |
|                   | Wrist    | 8  | Fractures(3), contusions(2), lacerations(1), other(1), sprains(1)                                                                                                                              |     |       |
|                   | Elbow    | 5  | Open wounds(2), abrasions(1), burnings(1), unknown(1)                                                                                                                                          |     |       |
|                   | Hand     | 32 | Fractures(17; 11 with amputation), open wounds(6), lacerations(3), contusion(2), muscle strains(1), other(1), sprains(1), unknown(1)                                                           |     |       |
| <b>Abdomen</b>    | Abdomen  | 2  | Contusion(1), soft tissue(1) ,                                                                                                                                                                 | 2   | 0.7%  |
| <b>Back</b>       | Back     | 25 | Fractures(8), unknown(8), other(3), contusions(2), abrasions(1), burnings(1), muscle strains(1), open wounds(1)                                                                                | 25  | 9.7%  |
| <b>Pelvis</b>     | Pelvis   | 8  | Fractures(4), contusion(1), internal bruising(1), muscle strain(1), other(1)                                                                                                                   | 8   | 3.1%  |
| <b>Lower Limb</b> | Thigh    | 13 | Fractures(4), contusions(2), lacerations(2), open wounds(2), abrasion (1), burnings(1), unknown(1)                                                                                             | 82  | 32%   |
|                   | Knee     | 19 | Contusions(4), sprains(4), lacerations(2), ligament ruptures(2), unknown(2), abrasions(1), dislocations(1), meniscus and ligament tears(1), muscle strains(1), others(1)                       |     |       |
|                   | Calf     | 17 | Fractures(7), burnings(2), contusions(2), lacerations(2), unknown(2), wounds(2)                                                                                                                |     |       |
|                   | Ankle    | 22 | Sprains(8), fractures(5), contusions(3), unknown(3), dislocations(1), ligament ruptures(1), other(1)                                                                                           |     |       |
|                   | Foot     | 11 | Fracture(3), unknown(3), contusions(2), other(2), lacerations(1)                                                                                                                               |     |       |

For peer review only - <http://bmjopen.bmj.com/site/about/guidelines.xhtml>

Of the twenty-three fatal accidents, five were the result of an involuntary landing on water and

Most of the injuries were minor ones(NACA I-II) followed by major ones(NACA III-VI) and fatal ones(NACA VII).

No significant difference in the distribution of fatal, major and minor injuries among the three main phases of flight(takeoff including inflation and runup, cruise and landing including approach) was found.

**With regard to the relationship between accident dynamic and accident severity, Accidents due to body contact with spinning prop and wing malfunction/deflation caused prevalently major injuries (NACA III-VI): 55,6% and 56,2% respectively.**

**Accidents due to water immersion were prevalently fatal (71,4%).**

**The other dynamics of injuries cause mainly minor injuries(NACA I-II).**

**A statistical correlation between injury severity and type of accident was found(*chi-square, p < 0.021; confidence 95%*); severity of injuries by type of accident is shown in Table 6.**

**Table 6. Severity of Injuries by Type of Accident**

| Type of Accident                             | Minor (%) | Major (%) | Fatal (%) |
|----------------------------------------------|-----------|-----------|-----------|
| Collision with Terrain/Obstruction on Ground | 62,5      | 18,8      | 18,8      |
| Powerplant Equipment Malfunction             | 100       | 0         | 0         |
| Body contact with spinning prop              | 44,4      | 55,6      | 0         |
| Hard Landing                                 | 74,1      | 22,2      | 3,7       |
| Fall                                         | 54,5      | 40,9      | 4,5       |
| Wing Malfunction or Deflation                | 31,2      | 56,2      | 12,5      |
| Other                                        | 80        | 0         | 20        |
| Handling                                     | 53,8      | 23,1      | 23,1      |
| Line Tangle/Damage                           | 100       | 0         | 0         |
| Collision with other Aircraft/Ultralight     | 40        | 40        | 20        |
| Water Immersion                              | 14,3      | 14,3      | 71,4      |
| All Types of Accident                        | 56,6      | 31,2      | 12,2      |

The correlation between accident severity and pilot rating is scarcely significant(*chi-square,*

1  
2  
3  
4  
5  
6  
7  
8  
9  
10  
11  
12  
13  
14  
15  
16  
17  
18  
19  
20  
21  
22  
23  
24  
25  
26  
27  
28  
29  
30  
31  
32  
33  
34  
35  
36  
37  
38  
39  
40  
41  
42  
43  
44  
45  
46  
47  
48  
49

In our study, the weather conditions were a main or contributing **cause of 10,1% of accidents**: weather conditions alone were the cause of 5.7% of accidents, while the weather conditions contributed to the accident together with pilot error in 4.4% of accidents. This figure is much lower than that reported in paragliding by Zeller[9], who **mentions** adverse weather conditions as a cause in 19% of paragliding accidents.

This can be explained by the fact that engine **allows** to fly frequently and in a much wider variety of weather conditions, so pilots are less **likely** to risk flying in extreme and hazardous conditions.

Nevertheless, our study clearly shows that **the use of an engine influences the accident dynamics**.

It can itself be the cause of accidents, it can be an important aggravating factor in the **event** of an accident **or it can also** be the direct cause of injuries.

Our study data showed that the majority of accidents occurred during takeoff(32.9%, or 43% if we include those during run-up and inflation, phases which can be considered an integral part of takeoff with a paramotor), while in paragliding, the most dangerous phase is landing[3,9].

This can be explained by the fact that takeoff with a PPG requires a delicate balance between the thrust of the engine, the weight of the crew and the lift of the wing. Additionally, the takeoff from level ground and the prevalently horizontal thrust of the engine results in the pilot moving away from the ground slowly, as opposed to paragliding, where the distance from the ground increases rapidly due to taking off from a slope.

As a result, falling distance remains reduced for much longer during takeoff with a PPG than **it does** with a P, limiting the possibility of adopting emergency manoeuvres and making **the** use of an emergency parachute impossible.

The use of **an** engine can be the direct cause of accidents distinctive to PPG: the two causes listed as “fuel exhaustion” and “mechanical failure: power-plant/propeller” were responsible for 14% of accidents.

The engine may also aggravate the accident, mainly due to the energy it produces and transmits to the crew, but also because of its weight. It is mounted on a special frame worn by the pilot: the overall weight of the equipment and accompanying power-plant, vary between 20 and 40 kg. In the case of collision, both of these factors synergize to make the impact more traumatic given that engine displacement varies between 80cc and 250cc and engine power varies between 11 to



Steep spirals are extremely dangerous manoeuvres in PPG; the position of the crew and the centrifugal acceleration (increased by the thrust of the engine) may reduce blood supply to the brain, and could cause momentary state of mental confusion or even blackouts at a time when the maximum level of attention is required[10].

In the case of immersion in water, the weight of the engine can drag the pilot rapidly under the surface, without giving him time to free himself from the equipment, making this type of accident particularly feared among paramotor pilots. In our study, this dynamic was responsible for 21.7 % of fatal accidents(71.4% of accidents involving water immersion were fatal) and a serious (non-fatal) case of near-drowning. It is therefore inadvisable to fly a paramotor over or near water; it is essential that pilots, wishing to do so, adopt the use of self-inflating and specially designed safety systems.

These auto-inflating flotation devices are mounted on a paramotor's frame and are activated by a CO2 cartridge which fires upon submersion: so no pilot input is required.

Paragliding injuries mainly involve lower limbs and spine [3, 9-17] while in PPG the upper limbs are more frequently affected and spinal injuries are less common.

The different injury distribution may depend in part on the different flight dynamics and different distribution of the forces acting on the crew. This is due to the thrust of the engine and the weight of the equipment.

The engine is undoubtedly the factor which distinguishes PPG from paragliding in terms of injury type; contact with the propeller caused 43 accidents (11.22%) in our study and was responsible for the majority of injuries to the upper limbs, in particular lesions to the hands (Fig. 2), wrists, forearms, arms and shoulders, as well as all eleven fractures with loss of fingers cited in this study. Contact with very hot engine parts was the cause of four cases of burnings to the face, neck, back, shoulder, arm, elbow, forearm, calf, thigh and ankle, while two cases of generalised burnings were the result of actual fires caused by combustion of the engine fuel. In another case, electrical burnings to the chest and one arm were sustained following collision with high voltage power lines.

Contact with power lines is an established cause of accidents in paragliding too, while burnings resulting from engine fuel combustion or contact with the engine are specific to PPG.

Indeed PPG is widely believed to be safer than paragliding, and fatal events considered to be

Table 7. Studies on Paragliding and Hang-gliding reporting fatal outcome after accidents.

| Sport        | Study                            | No. fatalities | No. participants | % Fatal events |
|--------------|----------------------------------|----------------|------------------|----------------|
| Paragliding  | Krüger-Franke et al. (1991)[11]. | 2              | 218              | 0.91%          |
| Paragliding  | Schulze et al. (2002)[18].       | 25             | 409              | 6.10%          |
| Paragliding  | Lautenschlager et al. [19]       | 1              | 86               | 1,16%          |
| Paragliding  | Fashing et al. (1997)[12]        | 0              | 70               | 0.00%          |
| Hang-gliding | Foray et al (1991)[20].          | 7              | 200              | 3.50%          |

Considering the differences between PPG and paragliding further research on this sport and related injuries should be conducted separately from paragliding, in separate studies.

The results of this study suggest that further investigation should consider if the use of certain types of safety clothing and equipment can significantly reduce various risks specific to this sport.

The effectiveness of protective gloves to protect against hand injuries caused by contact with the spinning prop should be evaluated in future studies.

Since many prop strike injuries have been higher on the upper limb where gloves would not be effective, an even better solution could be to add the so called "safety ring" to the engine cage. The safety ring is an aluminum ring that mounts just forward the radial arms with the same radius as the prop. The safety ring is designed to make it difficult for an open human hand to reach the prop at full rated thrust and it adds very little in terms of expense, and weight to the equipment.

Further studies should evaluate its effectiveness and its use could eventually be made obligatory, given that these injuries are often severe, in some cases involving amputation of the fingers. Given the extreme danger caused by water immersion, it might be useful that pilots provide themselves with an auto-inflating flotation device when flying near water. As in paragliding, periodical checking and maintenance of equipment (the wing and lines in particular) is essential. Additionally, in PPG, careful inspection and maintenance of the engine is vital, given that its malfunctioning could represent a cause of major injuries.

This study has some limitations.

For peer review only - <http://bmjopen.bmj.com/site/about/guidelines.xhtml>

First of all since there is no way of finding out exactly how many people knew about the existence of the database, the effect of under-reporting bias, due to the voluntary nature of our data

to the loss of some data even if in almost all the cases it was possible to obtain detailed information on the type of injuries by a careful reading of the narrative section of the reports.

**Conclusions**

This study reveals a pattern of accidents in PPG clearly different from that of paragliding: PPG accidents are more common during takeoff; weather and wind conditions have a lesser influence in causing accidents, the energy from the engine and the weight of the equipment may aggravate accidents.

The pattern of injuries sustained in this sport are distinctive: mostly involving the upper limbs, while those to the spine are less common. Finally, contrary to the belief held up to now by the experts of this sport[1], the number of fatal accidents/number of accidents is not lower than those which occur in paragliding and in hang-gliding[11, 12, 18, 19, 20](table 7).

For these reasons, PPG should be analysed separately from paragliding in distinct studies. Further research will be useful to confirm the data of this study, to investigate the role of safety equipment such as protective gloves, safety ring and auto-inflating flotation devices and to evaluate the effectiveness of periodical checks of the engine, to reduce certain risks specific to this sport.

**Contributorship Statement**

The study was conceived by Francesco Feletti and Jeff Goin.  
Jeff Goin collected data.  
Francesco Feletti carried out statistical analysis and wrote the draft of the manuscript. All authors contributed to critical revisions of the manuscript and approved the final version.

**Data sharing statement:** No additional data available.

**Competing interests:** None.

**Funding statement**

The authors received no funding for this research

**REFERENCES**

For peer review only - <http://bmjopen.bmj.com/site/about/guidelines.xhtml>

[1] Footflyer- The source for powered paragliding information.  
[http://www.footflyer.com/Safety/Incidents/incidents\\_and\\_analysis.htm](http://www.footflyer.com/Safety/Incidents/incidents_and_analysis.htm) [Oct 2013]

1  
2  
3  
4  
5  
6  
7  
8  
9  
10  
11  
12  
13  
14  
15  
16  
17  
18  
19  
20  
21  
22  
23  
24  
25  
26  
27  
28  
29  
30  
31  
32  
33  
34  
35  
36  
37  
38  
39  
40  
41  
42  
43  
44  
45  
46  
47  
48  
49

[4] USPPA- United States Powered Paragliding Association. <http://www.usppamembers.org> [Oct 2013].

[5] Fuller CW, Ekstrand J, Junge A, et al. Consensus statement on injury definitions and data collection procedures in studies of football(soccer) injuries. Clin J Sport Med. 2006; 16(2): 83-92.

[6] Fuller CW, Ekstrand J, Junge A, et al. Consensus statement on injury definitions and data collection procedures in studies of football(soccer) injuries. Scand J Med Sci Sports 2006;16 (2) 83-92.

[7] Fuller CW, Ekstrand J, Junge A, et al. Consensus statement on injury definitions and data collection procedures in studies of football(soccer) injuries. Clin J Sport Med. 2006; 40(3): 193-201.

[8] Lackner CK, Schlechtriemen T, Burghofer K, et al. The Munich NACA score: Modification of the NACA score for preclinical emergency medicine. *Notfall und Rettungsmedizin* 2005, 8(2):109-111.

[9] Zeller T, Billing A, Lob G. Injuries in paragliding. Int Orthop. 1992;16(3): 255-9.

[10] Schneider S, Abein V, Askew CD, et al. Changes in cerebral oxygenation during parabolic flight. *Eur J Appl Physiol* 2013; 113 (6): 1617-23.

[11] Krüger-Franke M, Siebert CH, Pfürringer W. Paragliding injuries. Br J Sports Med 1991; 25(2): 98-101.

[12] Fasching G, Schippinger G, Pretschner R. Paragliding accidents in remote areas. 1997 Aug;8(3):129-33.

[13] Rekand T, Schaanning EE, Varga V, et al. Spinal cord injuries among paragliders in Norway. Spinal Cord. 2008; 46(6): 412-16.

[14] Hasler RM, Hüttner HE, Keel MJ, et al. Spinal and pelvic injuries in airborne sports: a retrospective analysis from a major Swiss trauma centre. Injury. 2012; 43(4): 440-5.

[15] Exadaktylos AK, Scwabas G, Eggli S, et al. Paragliding accidents--the spine is at risk. A study from a Swiss Trauma Centre. Eur J Emerg Med. 2003; 10(1): 27-9.

[16] Gauler R, Moulin P, Koch HG, et al. Paragliding accidents with spinal cord injury: 10 years' experience at a single institution. Spine. 2006; 31(10): 1125-30.

[17] Laver L, Mei Dan O. Paragliding. In Mei Dan O, Carmont M. Adventure and Extreme Sports Injuries. Springer-Verlag London 2013; 12: 247-272.

[18] Schulze W, Richter J, Schulze B, et al. Injury prophylaxis in paragliding. Br J Sports Med

**FIGURE LEGENDS**

Fig. 1: Paramotor in flight

Fig. 2: Serious hand lesions caused by contact with the engine prop: these injuries are specific to powered paragliding.

For peer review only

1  
2  
3  
4  
5  
6  
7  
8  
9  
10  
11  
12  
13  
14  
15  
16  
17  
18  
19  
20  
21  
22  
23  
24  
25  
26  
27  
28  
29  
30  
31  
32  
33  
34  
35  
36  
37  
38  
39  
40  
41  
42  
43  
44  
45  
46  
47  
48  
49  
50  
51  
52  
53  
54  
55  
56  
57  
58  
59  
60

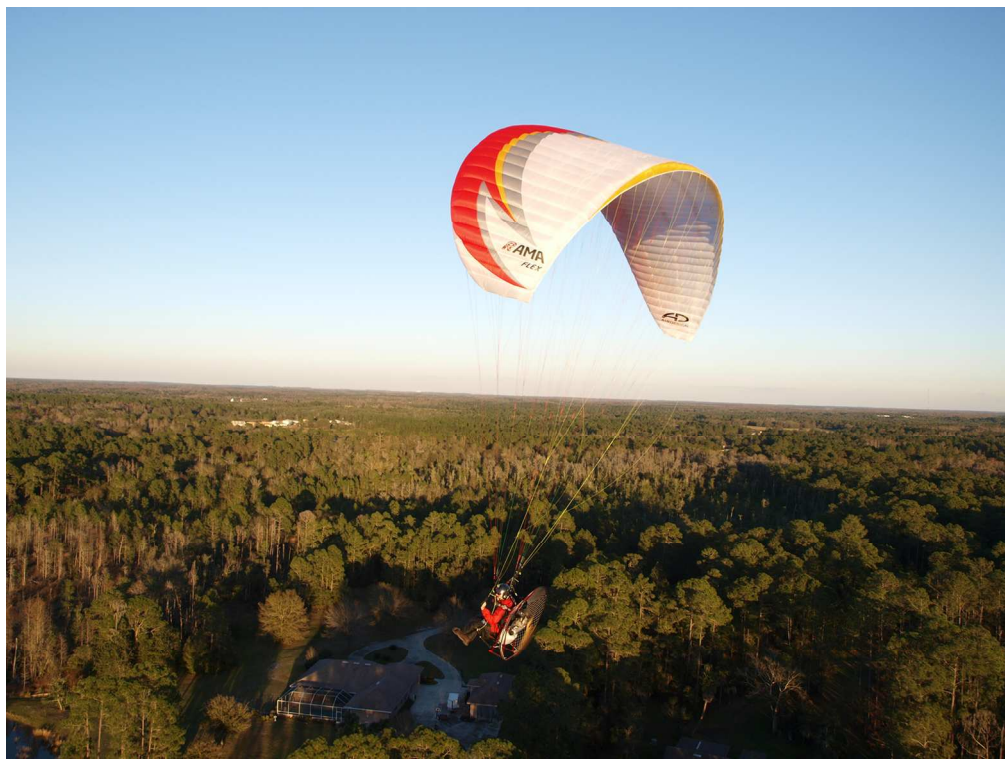

Figure 1: Paramotor in flight  
134x101mm (300 x 300 DPI)

ew only

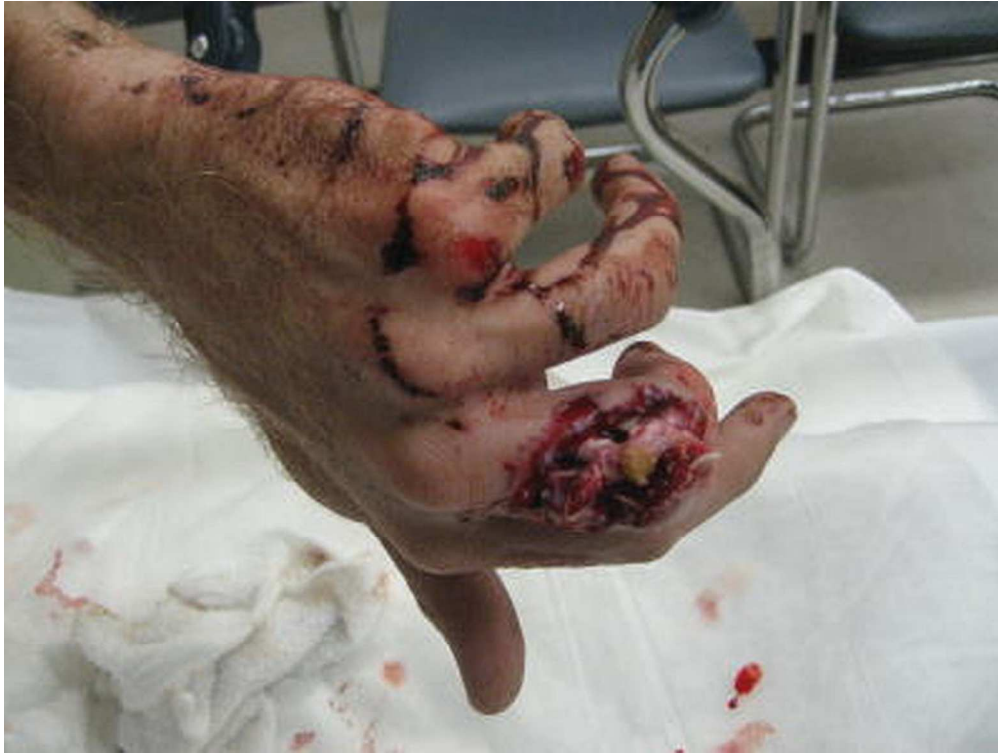

Fig. 2: Serious hand lesions caused by contact with the engine prop: these injuries are specific to powered paragliding.

90x67mm (300 x 300 DPI)



## STROBE Statement—checklist of items that should be included in reports of observational studies

|                              | Item No | Recommendation                                                                                                                                                                                                                                                                                                                                                                                                                                                                                                           |
|------------------------------|---------|--------------------------------------------------------------------------------------------------------------------------------------------------------------------------------------------------------------------------------------------------------------------------------------------------------------------------------------------------------------------------------------------------------------------------------------------------------------------------------------------------------------------------|
| <b>Title and abstract</b>    | 1       | (a) Indicate the study's design with a commonly used term in the title or the abstract<br>(b) Provide in the abstract an informative and balanced summary of what was done and what was found                                                                                                                                                                                                                                                                                                                            |
| <b>Yes</b>                   |         |                                                                                                                                                                                                                                                                                                                                                                                                                                                                                                                          |
| <b>Introduction</b>          |         |                                                                                                                                                                                                                                                                                                                                                                                                                                                                                                                          |
| Background/rationale         | 2       | Explain the scientific background and rationale for the investigation being reported                                                                                                                                                                                                                                                                                                                                                                                                                                     |
| <b>Yes</b>                   |         |                                                                                                                                                                                                                                                                                                                                                                                                                                                                                                                          |
| Objectives                   | 3       | State specific objectives, including any prespecified hypotheses                                                                                                                                                                                                                                                                                                                                                                                                                                                         |
| <b>Yes</b>                   |         |                                                                                                                                                                                                                                                                                                                                                                                                                                                                                                                          |
| <b>Methods</b>               |         |                                                                                                                                                                                                                                                                                                                                                                                                                                                                                                                          |
| Study design                 | 4       | Present key elements of study design early in the paper                                                                                                                                                                                                                                                                                                                                                                                                                                                                  |
| <b>Yes</b>                   |         |                                                                                                                                                                                                                                                                                                                                                                                                                                                                                                                          |
| Setting                      | 5       | Describe the setting, locations, and relevant dates, including periods of recruitment, exposure, follow-up, and data collection                                                                                                                                                                                                                                                                                                                                                                                          |
| <b>Yes</b>                   |         |                                                                                                                                                                                                                                                                                                                                                                                                                                                                                                                          |
| Participants                 | 6       | (a) <i>Cohort study</i> —Give the eligibility criteria, and the sources and methods of selection of participants. Describe methods of follow-up<br><i>Case-control study</i> —Give the eligibility criteria, and the sources and methods of case ascertainment and control selection. Give the rationale for the choice of cases and controls<br><i>Cross-sectional study</i> —Give the eligibility criteria, and the sources and methods of selection of participants                                                   |
| <b>Yes</b>                   |         | (b) <i>Cohort study</i> —For matched studies, give matching criteria and number of exposed and unexposed<br><i>Case-control study</i> —For matched studies, give matching criteria and the number of controls per case                                                                                                                                                                                                                                                                                                   |
| Variables                    | 7       | Clearly define all outcomes, exposures, predictors, potential confounders, and effect modifiers. Give diagnostic criteria, if applicable                                                                                                                                                                                                                                                                                                                                                                                 |
| <b>Yes</b>                   |         |                                                                                                                                                                                                                                                                                                                                                                                                                                                                                                                          |
| Data sources/<br>measurement | 8*      | For each variable of interest, give sources of data and details of methods of assessment (measurement). Describe comparability of assessment methods if there is more than one group                                                                                                                                                                                                                                                                                                                                     |
| <b>Yes</b>                   |         |                                                                                                                                                                                                                                                                                                                                                                                                                                                                                                                          |
| Bias                         | 9       | Describe any efforts to address potential sources of bias                                                                                                                                                                                                                                                                                                                                                                                                                                                                |
| <b>Yes</b>                   |         |                                                                                                                                                                                                                                                                                                                                                                                                                                                                                                                          |
| Study size                   | 10      | Explain how the study size was arrived at                                                                                                                                                                                                                                                                                                                                                                                                                                                                                |
| <b>Yes</b>                   |         |                                                                                                                                                                                                                                                                                                                                                                                                                                                                                                                          |
| Quantitative variables       | 11      | Explain how quantitative variables were handled in the analyses. If applicable, describe which groupings were chosen and why                                                                                                                                                                                                                                                                                                                                                                                             |
| <b>Yes</b>                   |         |                                                                                                                                                                                                                                                                                                                                                                                                                                                                                                                          |
| Statistical methods          | 12      | (a) Describe all statistical methods, including those used to control for confounding<br>(b) Describe any methods used to examine subgroups and interactions<br>(c) Explain how missing data were addressed<br>(d) <i>Cohort study</i> —If applicable, explain how loss to follow-up was addressed<br><i>Case-control study</i> —If applicable, explain how matching of cases and controls was addressed<br><i>Cross-sectional study</i> —If applicable, describe analytical methods taking account of sampling strategy |
| <b>Yes</b>                   |         | (e) Describe any sensitivity analyses                                                                                                                                                                                                                                                                                                                                                                                                                                                                                    |



Continued on next page

For peer review only

1  
2  
3  
4  
5  
6  
7  
8  
9  
10  
11  
12  
13  
14  
15  
16  
17  
18  
19  
20  
21  
22  
23  
24  
25  
26  
27  
28  
29  
30  
31  
32  
33  
34  
35  
36  
37  
38  
39  
40  
41  
42  
43  
44  
45  
46  
47  
48  
49  
50  
51  
52  
53  
54  
55  
56  
57  
58  
59  
60

| <b>Results</b>                 |     |                                                                                                                                                                                                                                                                                                                                                                                                               |
|--------------------------------|-----|---------------------------------------------------------------------------------------------------------------------------------------------------------------------------------------------------------------------------------------------------------------------------------------------------------------------------------------------------------------------------------------------------------------|
| Participants<br><b>Yes</b>     | 13* | (a) Report numbers of individuals at each stage of study—eg numbers potentially eligible, examined for eligibility, confirmed eligible, included in the study, completing follow-up, and analysed<br>(b) Give reasons for non-participation at each stage<br>(c) Consider use of a flow diagram                                                                                                               |
| Descriptive data<br><b>Yes</b> | 14* | (a) Give characteristics of study participants (eg demographic, clinical, social) and information on exposures and potential confounders<br>(b) Indicate number of participants with missing data for each variable of interest<br>(c) <i>Cohort study</i> —Summarise follow-up time (eg, average and total amount)                                                                                           |
| Outcome data<br><b>Yes</b>     | 15* | <i>Cohort study</i> —Report numbers of outcome events or summary measures over time<br><i>Case-control study</i> —Report numbers in each exposure category, or summary measures of exposure<br><i>Cross-sectional study</i> —Report numbers of outcome events or summary measures                                                                                                                             |
| Main results<br><b>Yes</b>     | 16  | (a) Give unadjusted estimates and, if applicable, confounder-adjusted estimates and their precision (eg, 95% confidence interval). Make clear which confounders were adjusted for and why they were included<br>(b) Report category boundaries when continuous variables were categorized<br>(c) If relevant, consider translating estimates of relative risk into absolute risk for a meaningful time period |
| Other analyses<br><b>Yes</b>   | 17  | Report other analyses done—eg analyses of subgroups and interactions, and sensitivity analyses                                                                                                                                                                                                                                                                                                                |
| <b>Discussion</b>              |     |                                                                                                                                                                                                                                                                                                                                                                                                               |
| Key results<br><b>Yes</b>      | 18  | Summarise key results with reference to study objectives                                                                                                                                                                                                                                                                                                                                                      |
| Limitations<br><b>Yes</b>      | 19  | Discuss limitations of the study, taking into account sources of potential bias or imprecision. Discuss both direction and magnitude of any potential bias                                                                                                                                                                                                                                                    |
| Interpretation<br><b>Yes</b>   | 20  | Give a cautious overall interpretation of results considering objectives, limitations, multiplicity of analyses, results from similar studies, and other relevant evidence                                                                                                                                                                                                                                    |
| Generalisability<br><b>Yes</b> | 21  | Discuss the generalisability (external validity) of the study results                                                                                                                                                                                                                                                                                                                                         |
| <b>Other information</b>       |     |                                                                                                                                                                                                                                                                                                                                                                                                               |
| Funding<br><b>Yes</b>          | 22  | Give the source of funding and the role of the funders for the present study and, if applicable, for the original study on which the present article is based                                                                                                                                                                                                                                                 |

\*Give information separately for cases and controls in case-control studies and, if applicable, for exposed and unexposed groups in cohort and cross-sectional studies.

**Note:** An Explanation and Elaboration article discusses each checklist item and gives methodological background and published examples of transparent reporting. The STROBE checklist is best used in conjunction with this article (freely available on the Web sites of PLoS Medicine at <http://www.plosmedicine.org/>, Annals of Internal Medicine at <http://www.annals.org/>, and Epidemiology at <http://www.epidem.com/>). Information on the STROBE Initiative is available at [www.strobe-statement.org](http://www.strobe-statement.org).

# BMJ Open

## Accidents and injuries related to powered paragliding: a cross sectional study

|                                 |                                                                                                                                                                                                                                                        |
|---------------------------------|--------------------------------------------------------------------------------------------------------------------------------------------------------------------------------------------------------------------------------------------------------|
| Journal:                        | <i>BMJ Open</i>                                                                                                                                                                                                                                        |
| Manuscript ID:                  | bmjopen-2014-005508.R3                                                                                                                                                                                                                                 |
| Article Type:                   | Research                                                                                                                                                                                                                                               |
| Date Submitted by the Author:   | 02-Aug-2014                                                                                                                                                                                                                                            |
| Complete List of Authors:       | Feletti, Francesco; Ospedale S. Maria delle Croci, Presidio Ospedaliero di Ravenna, U.O.Radiologia, Ausl della Romagna, Ravenna; Goin, Jeff; B.S. Aeronautical Science, Embry Riddle Aeronautical University , ; U.S. Powered Paragliding Association, |
| <b>Primary Subject Heading</b>: | Sports and exercise medicine                                                                                                                                                                                                                           |
| Secondary Subject Heading:      | Sports and exercise medicine, Emergency medicine, Radiology and imaging, Public health, Occupational and environmental medicine                                                                                                                        |
| Keywords:                       | Extreme Sports, Paragliding, Sporting Injuries, Adventure Sports, Powered Paragliding, Hand Injuries                                                                                                                                                   |
|                                 |                                                                                                                                                                                                                                                        |

SCHOLARONE™  
Manuscripts

Title: **Accidents and injuries related to powered paragliding: a cross sectional study**

Keywords

**Extreme Sports, Paragliding, Sporting injuries, Adventure Sports, Powered Paragliding, Hand Injuries**

**Corresponding Author**

Francesco Feletti, MD,

Ospedale S. Maria delle Croci, Presidio Ospedaliero di Ravenna,

U.O.Radiologia, Ausl della Romagna,

Ravenna, Italy.

ExtremeSportMed,

[www.extremesportmed.org](http://www.extremesportmed.org);

e-mail: [feletti@extremesportmed.org](mailto:feletti@extremesportmed.org)

Phone: +39 393 123 0 456

**Authors**

**Francesco Feletti, MD,**

Ospedale S. Maria delle Croci, Presidio Ospedaliero di Ravenna,

U.O.Radiologia, Ausl della Romagna,

Ravenna, Italy.

ExtremeSportMed,

[www.extremesportmed.org](http://www.extremesportmed.org)

2942

## Accidents and injuries related to powered paragliding: a cross sectional study

### ABSTRACT

**Objectives** - Powered paragliding and paragliding are two totally different sports, mainly because of the use of an engine in powered paragliding. As a consequence the pattern of injuries caused by each of these two sports may be different.

**Setting** - To test this hypothesis, we analysed 384 incident reports gathered by the United States Powered Paragliding Association from 1995 to 2012.

The majority of the incidents described occurred in the US, while 26 incidents occurred elsewhere: Canada(8), Mexico(5), Panama(1), China(1), Japan(1), Malaysia(1), Indonesia(Java)(1), Europe(8): of which Spain(1), Belgium(1), United Kingdom(3), Italy(1), Romania(1), Unknown(1).

**Outcome:** to identify the most affected body area and the most common type of injury sustained in PPG, and to highlight any differences with respect to paragliding.

**Results** - The most affected body areas in PPG were the upper limbs(44.5%) followed by the lower limbs (32%), the back(9.8,%), the head(7%), the pelvis(3.1), the chest(2.7%) and the abdomen (0.7%) ( $p < 0,001$ ).

The engine caused 43 accidents(11.22%) in our study and was responsible for the majority of injuries to the upper limbs.

The number of fatal accidents is not lower than those which occur in paragliding and in hang-gliding.

**Conclusions** - To help preventing the specific injuries of powered paragliding, the most appropriate equipment should be identified.

The results of this study also suggest that in the future this sport should be analyzed separately from paragliding.

### Strengths and limitations of this study

For peer review only - <http://bmjopen.bmj.com/site/about/guidelines.xhtml>

This is the first study in literature on powered-paragliding.

We analyzed a large amount of data(384 incident reports) collected from 1995 to 2012

Powered paragliding or paramotor (PPG) is a sport in which the pilot flies by means of a wing similar to that of paragliding, the sport from which it derives, under which the crew is suspended by means of long lines. It is a sport on its own right: different because the equipment used includes an engine, worn on the back and held in place by a harness (Fig. 1).

In contrast to paragliding, which is practised over hilly or mountaineous areas, because it requires a descent in order to take off, the PPG can take off from level ground thank to the power of the engine.

It is safer to fly over level ground because there are fewer obstacles, the thermals are not too strong and winds are generally steady.

Furthermore PPG differs from paragliding because the thrust of the engine allows the paramotor pilot to take off and fly without the need for strong winds or thermals, therefore in safer and more stable weather conditions.

Compared to other aerial sports, paragliding nevertheless remains the most similar to PPG they both require the pilot to keep the wing inflated by means of his own weight and skill.

PPG was invented in the 1980's and rapidly gained popularity, so much that various national and international competitions have been held throughout the world over the last few years.

In 2007 it was estimated that the sport was practised in the United States alone, by 3000 people[1].

It seems to be a prevalently male sport, judging from the fact that in 2013 the number of female members of the U.S. Powered Paragliding Association, represented only the 2.6% of the total members.

As PPG has grown in popularity, the number of accidents associated with this sport has inevitably increased. Knowing the accident dynamics, the type of injuries sustained and the body area affected is of vital importance for sports medicine, in order to provide an insight into the types of conduct, protective clothing and safety systems, which should be adopted to improve the safety of any given sport.

A careful examination of the literature leads us to conclude that there are no existing studies on this sport in medical literature, except from a case we had previously reported[2]: in a recent literature review[3], this sport is only mentioned among the variety of paragliding, to which it is usually grouped.

Given that the way of flying a paramotor is very different to that of a paraglider, we supposed that

We analysed the incident reports of the accidents occurred between 1995 and the end of 2012, that the US Powered Paragliding Association(USPPA) collected using a specific form published on its website[4].

The collection of the data started in 1995: we decided to use all the data available between 1995 and 2012(the starting date of the present study).

The collection of data was primarily thought for accidents in the U.S. but, since USPPA is very popular among powered paragliders worldwide, accidents from other countries were also reported.

The forms submitted had been completed by the pilot involved, by a witness, or by the Association itself based on the information gathered.

The form included: drop-down menu lists, checklists and text fields.

The form consisted of five sections:

- 1-General information (date, time and place of the accident);
- 2-Pilot information: including demographic information and details of the pilot's PPG experience;
- 3-Details on the accident: including a description of the type of accident, the main cause, weather conditions at the time, characteristics of the takeoff and landing area, and details of the pilot's clothing and equipment;
- 4-Injury information: including the body parts affected, the seriousness of the injury, any medical assistance and possible collateral damage to people or things.
- 5-Narrative: an extensive description of the event and its consequences.

The form lacked a specific question about the nature of the injuries but a careful reading of the narrative section, allowed to obtain these information from almost all the forms.

When these data were missing they were named as 'unknown' in the results.

The reading of the narrative section was carried out by only one researcher.

The data published by the USPPA were public and anonymous; its use for study and publication purposes was authorised beforehand by the USPPA.

The data were analysed using descriptive statistics, using the software Wizard Pro 1.3.27 and the *chi-square* test.

The following definition of injury has been adopted: "any physical complaint sustained by an athlete that results from training or competition, irrespective of the need for medical attention or

time lost from sports activities"[5, 7]

1  
2  
3  
4  
5  
6  
7  
8  
9  
10  
11  
12  
13  
14  
15  
16  
17  
18  
19  
20  
21  
22  
23  
24  
25  
26  
27  
28  
29  
30  
31  
32  
33  
34  
35  
36  
37  
38  
39  
40  
41  
42  
43  
44  
45  
46  
47  
48  
49

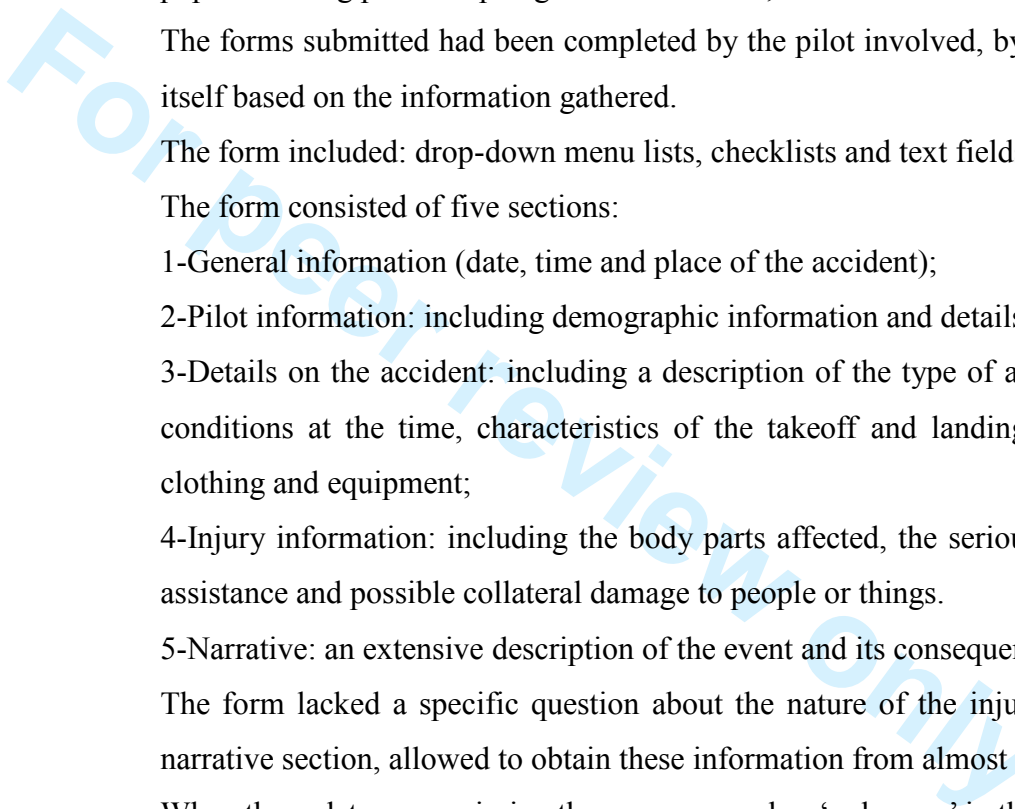

immediate emergency medical assistance: therefore we decided to consider them as a single category.

We subsequently focused on the accidents resulting in injuries (disregarding those with a NACA score of 0), and we divided these into 3 classes based on the severity of the injuries:

1-minor(NACA I, II), usually not requiring emergency medical measures

2-major(NACA III, IV, V, VI), almost always requiring emergency medical measures

3-fatal(NACA VII).

We associated the accidents thus classified with the accident dynamics cited in the incident reports and with the phase of flight in which the accidents occurred. We also explored the correlation between injury severity and pilot rating, and between injury severity and accident dynamics.

### Results

At the starting date of the present study, 384 incident reports were available.

One incident report had been submitted twice, therefore one copy was retained and the other was excluded.

The pilots involved in powered paragliding accidents were aged between 24 and 72(average age= 44.5, median= 48, SD= 9.54).

The majority of the accidents described occurred in the US, while 26 occurred elsewhere: Canada(8), Mexico(5), Panama(1), China(1), Japan(1), Malaysia(1), Indonesia (Java)(1), Europe (8): of which Spain(1), Belgium(1), United Kingdom(3), Italy(1), Romania(1), Unknown(1). Only three accidents involved a female pilot.

Pilot injuries were classified according to NACA category(table 1).

**Table 1.NACA Score of PPG accidents in this study**

| Category | Description                                                        | Pilots | %    |
|----------|--------------------------------------------------------------------|--------|------|
| NACA 0   | No injury or disease                                               | 194    | 50.6 |
| NACA I   | Slight injury or illness. No acute medical intervention necessary. | 59     | 15.4 |



|          |                                                                                                                                           |    |      |
|----------|-------------------------------------------------------------------------------------------------------------------------------------------|----|------|
|          | necessary <b>BMJ Open</b>                                                                                                                 |    |      |
| NACA III | Moderate to heavy but not life-threatening disorder<br>Frequently emergency medical measures on the site                                  | 43 | 11.2 |
| NACA IV  | Heavy injury or illness where rapid development into a life threatening condition can not be excluded. Emergency medical care is required | 11 | 2.9  |
| NACA V   | Acute vital(life threatening) danger                                                                                                      | 5  | 1.3  |
| NACA VI  | Breath and/or cycle stop and/or reanimation                                                                                               |    |      |
| NACA VII | Death                                                                                                                                     | 23 | 6    |

The following factors were taken into consideration:, the phase of flight during which the accident took place(table 2), the primary cause(table 3) and the type of accident(table 4).

As for the experience of the pilots involved, pilot rating was distributed as follows: 25.5% PPG2 (pilots who have an experience of 40 or more flights[4]), 13.5% PPG1(experience of 2 flights or more), 15.1% PPG3(experience of 200 or more flights), 9.1% Instructor, 12.8% None, 11.7% Not applicable, 6% Unknown, 1.8% Other.

No statistically significant correlation was found in our sample between accident severity and pilot rating(*chi-square*,  $p= 0.044$ ).

With reference to the place where the accidents occurred, these are the following data: 70.5% flat terrain, 11.4% not applicable, 8.8% hilly terrain, 2.6% water, 2.6 % mountainous terrain, 2.6% unknown data, 1.3% other.

**Table 2. Phase of Flight**

| Phase of Flight    | Count | %   |
|--------------------|-------|-----|
| Takeoff (including | 165   | 43% |

1  
2  
3  
4  
5  
6  
7  
8  
9  
10  
11  
12  
13  
14  
15  
16  
17  
18  
19  
20  
21  
22  
23  
24  
25  
26  
27  
28  
29  
30  
31  
32  
33  
34  
35  
36  
37  
38  
39  
40  
41  
42  
43  
44  
45  
46  
47  
48  
49

|                     |    |       |
|---------------------|----|-------|
| Not Available/Other | 56 | 14.6% |
|---------------------|----|-------|

**Table 3. Primary Cause of Accidents**

| Primary cause                                        | Tot. | %    |
|------------------------------------------------------|------|------|
| Pilot Errors (only)                                  | 205  | 53.5 |
| Mechanical Failure (including fuel exhaustion)       | 67   | 17.5 |
| Pilot Error & Weather                                | 17   | 4.4  |
| Pilot Error & Mechanical Failure                     | 17   | 4.4  |
| Weather (Gust, Thermal, Rain, Wind increase, etc..). | 22   | 5.7  |
| Not Applicable/unknown                               | 24   | 4.4  |
| Other (including wake Tight takeoff/LZ Area)         | 31   | 1.8  |

**Table 4. Type of Accidents**

| Type                                         | Tot. | %    |
|----------------------------------------------|------|------|
| Collision with Terrain/Obstruction on Ground | 76   | 19.8 |
| Powerplant Equipment Malfunction             | 58   | 15.1 |
| Body contact with spinning prop              | 43   | 11.2 |
| Hard Landing                                 | 40   | 10.4 |
| Fall                                         | 37   | 9.7  |
| Wing Malfunction or Deflation                | 35   | 9.1  |
| Other                                        | 29   | 7.5  |
| Handling                                     | 20   | 5.2  |
| Line Tangle/Damage                           | 15   | 3.9  |
| Collision with other Aircraft/Ultralight     | 14   | 3.6  |
| Water Immersion                              | 10   | 2.6  |
| Other/Not Applicable                         | 35   | 1.5  |

1  
2  
3  
4  
5  
6  
7  
8  
9  
10  
11  
12  
13  
14  
15  
16  
17  
18  
19  
20  
21  
22  
23  
24  
25  
26  
27  
28  
29  
30  
31  
32  
33  
34  
35  
36  
37  
38  
39  
40  
41  
42  
43  
44  
45  
46  
47  
48  
49

| Body region       | Body area | No. Cases | Types of Injury (number of cases)                                                                                                                                                              | Tot | % of all injuries |
|-------------------|-----------|-----------|------------------------------------------------------------------------------------------------------------------------------------------------------------------------------------------------|-----|-------------------|
| <b>Head</b>       | Head      | 7         | Concussions(3), unknown(2), contusions(1), open wounds(1)                                                                                                                                      | 18  | 7%                |
|                   | Neck      | 3         | Burnings(1), C2 fracture(1), unknown(1)                                                                                                                                                        |     |                   |
|                   | Face      | 8         | Fractures(4>), lacerations(2), burnings(1), other(1)                                                                                                                                           |     |                   |
| <b>Chest</b>      | Chest     | 7         | Rib fractures(2), abrasions(1), burnings(1), contusions(1), open wounds(1), unknown(1)                                                                                                         | 7   | 2.7%              |
| <b>Upper Limb</b> | Shoulder  | 32        | Fractures(6), open wounds(5), bruising(4), other(3), tendon injuries(3), dislocations(2), lacerations(2), unknown(2), abrasions (1), burnings(1), contusions(1), muscle strains(1), sprains(1) | 114 | 44.5%             |
|                   | Arm       | 26        | Lacerations(7), burnings(5), contusions(3), fractures(3), unknown(3), open wounds(2), tendon rupture(1), abrasions(1), sprains(1)                                                              |     |                   |
|                   | Forearm   | 11        | Burnings(2), lacerations(2), fractures(2), unknown(2), contusions(1) open wounds(1), soft tissue injuries(1)                                                                                   |     |                   |
|                   | Wrist     | 8         | Fractures(3), contusions(2), lacerations(1), other(1), sprains(1)                                                                                                                              |     |                   |
|                   | Elbow     | 5         | Open wounds(2), abrasions(1), burnings(1), unknown(1)                                                                                                                                          |     |                   |
|                   | Hand      | 32        | Fractures(17; 11with amputation), open wounds(6), lacerations(3), contusion(2), muscle strains(1), other(1), sprains(1), unknown(1)                                                            |     |                   |
| <b>Abdomen</b>    | Abdomen   | 2         | Contusion(1), soft tissue(1) ,                                                                                                                                                                 | 2   | 0.7%              |
| <b>Back</b>       | Back      | 25        | Fractures(8), unknown(8), other(3), contusions(2), abrasions(1), burnings(1), muscle strains(1), open wounds(1)                                                                                | 25  | 9.7%              |
| <b>Pelvis</b>     | Pelvis    | 8         | Fractures(4), contusion(1), internal bruising(1), muscle strain(1), other(1)                                                                                                                   | 8   | 3.1%              |
| <b>Lower Limb</b> | Thigh     | 13        | Fractures(4), contusions(2), lacerations(2), open wounds(2), abrasion(1), burnings(1), unknown(1)                                                                                              | 82  | 32%               |
|                   | Knee      | 19        | Contusions(4), sprains(4), lacerations(2), ligament ruptures(2), unknown(2), abrasions(1), dislocations(1), meniscus and ligament tears(1), muscle strains(1), others(1)                       |     |                   |
|                   | Calf      | 17        | Fractures(7), burnings(2), contusions(2), lacerations(2), unknown(2), wounds(2)                                                                                                                |     |                   |
|                   | Ankle     | 22        | Sprains(8), fractures(5), contusions(3), unknown(3), dislocations(1),                                                                                                                          |     |                   |

drawing: one autopsy revealed the cause of death to be drowning which was probably the consequence of the unconsciousness due to the head injury sustained.

Another two accidents were fatal due to cerebral spine fractures with spinal cord damage.

In four cases, death was caused by severe head trauma. In all remaining cases, death was the result of high-energy multi-trauma, although the reports do not allow us to identify the precise injuries responsible for death.

Most of the injuries were minor ones(NACA I-II) followed by major ones(NACA III-VI) and fatal ones(NACA VII).

No significant difference was found in the distribution of fatal, major and minor injuries among the three main phases of flight(takeoff including inflation and runup, cruise and landing including approach).

With regard to the relationship between accident dynamic and accident severity, accidents due to body contact with spinning prop and wing malfunction/deflation caused prevalently major injuries(NACA III-VI): 55.6% and 56.2% respectively.

Accidents due to water immersion were prevalently fatal(71.4%).

The other dynamics of injuries cause mainly minor injuries(NACA I-II).

A statistical correlation between injury severity and type of accident was found(chi-square,  $p < 0.021$ ; confidence 95%); severity of injuries by type of accident is shown in Table 6.

**Table 6. Severity of Injuries by Type of Accident**

| Type of Accident                             | Minor (%) | Major (%) | Fatal (%) |
|----------------------------------------------|-----------|-----------|-----------|
| Collision with Terrain/Obstruction on Ground | 62.5      | 18.8      | 18.8      |
| Powerplant Equipment Malfunction             | 100       | 0         | 0         |
| Body contact with spinning prop              | 44.4      | 55.6      | 0         |
| Hard Landing                                 | 74.1      | 22.2      | 3.7       |
| Fall                                         | 54.5      | 40.9      | 4.5       |
| Wing Malfunction or Deflation                | 31.2      | 56.2      | 12.5      |
| Other                                        | 80        | 0         | 20        |
| Handling                                     | 53.8      | 23.1      | 23.1      |

|                              |                 |             |             |             |
|------------------------------|-----------------|-------------|-------------|-------------|
| <b>Water Immersion</b>       | <b>BMJ Open</b> | 14.3        | 14.3        | 71.4        |
| <b>All Types of Accident</b> |                 | <b>56.6</b> | <b>31.2</b> | <b>12.2</b> |

The correlation between accident severity and pilot rating is scarcely significant (*chi-square*,  $p=0.044$ ; confidence 95%).

The data on the collateral damage from the various accidents reveal that in addition to the 383 pilots directly involved, seven bystanders and sixteen pilots of other aircrafts involved in collisions were also injured, for a total of 406 people. The data are insufficient to precisely classify the severity of the injuries suffered by these people. No injuries were sustained in thirteen cases.

### **Discussion**

In our study, the weather conditions were a main or contributing cause of 10.1% of accidents: weather conditions alone were the cause of 5.7% of accidents, while the weather conditions contributed to the accident together with pilot error in 4.4% of accidents. This figure is much lower than the one reported in paragliding by Zeller[9], who mentions adverse weather conditions as a cause in 19% of paragliding accidents.

This can be explained by the fact that an engine allows to fly frequently and in a much wider variety of weather conditions, so pilots are less likely to risk flying in extreme and hazardous conditions. Nevertheless, our study clearly shows that the use of an engine influences the accident dynamics. It can itself be the cause of accidents, it can be an important aggravating factor in the event of an accident or it can also be the direct cause of injuries.

This study shows that takeoff is the most dangerous phase of flight in PPG (32.9% of the accidents took place during this phase of flight; or 43% if we include those during run-up and inflation, phases which can be considered an integral part of takeoff with a paramotor), while in paragliding, the most dangerous phase is landing[3,9].

This can be explained by the fact that takeoff with a PPG requires a delicate balance between the thrust of the engine, the weight of the crew and the lift of the wing. Additionally, the takeoff from level ground and the prevalently horizontal thrust of the engine results in the pilot moving away from the ground slowly, as opposed to paragliding, where the distance from the ground increases rapidly due to taking off from a slope.

14% of accidents.

**BMJ Open**

1  
2  
3  
4  
5  
6  
7  
8  
9  
10  
11  
12  
13  
14  
15  
16  
17  
18  
19  
20  
21  
22  
23  
24  
25  
26  
27  
28  
29  
30  
31  
32  
33  
34  
35  
36  
37  
38  
39  
40  
41  
42  
43  
44  
45  
46  
47  
48  
49

The engine may also aggravate the accident, mainly due to the energy it produces and transmits to the crew, but also because of its weight. It is mounted on a special frame worn by the pilot: the overall weight of the equipment and accompanying power-plant, vary between 20 and 40 kg. In the case of collision, both of these factors synergize to make the impact more traumatic given that engine displacement varies between 80cc and 250cc and engine power varies between 11 to 22.5kW; engine thrust is at its highest during takeoff: the phase of flight when PPG accidents occur most frequently.

In certain reports it is explicitly mentioned that it was precisely the energy supplied by the engine which made the impact fatal.

Various reports also describe that pilot errors had been to some extent determined by a state of mental confusion suffered by the pilot during the execution of acrobatic stunts.

Steep spirals are extremely dangerous manoeuvres in PPG; the position of the crew and the centrifugal acceleration (increased by the thrust of the engine) may reduce blood supply to the brain, and could cause momentary state of mental confusion or even blackouts at a time when the maximum level of attention is required[10].

In the case of immersion in water, the weight of the engine can drag the pilot rapidly under the surface, without giving him time to free himself from the equipment, making this type of accident particularly feared among paramotor pilots. In our study, this dynamic was responsible for 21.7 % of fatal accidents (71.4% of accidents involving water immersion were fatal) and a serious (non-fatal) case of near-drowning. It is therefore inadvisable to fly a paramotor over or near water; it is essential that pilots, wishing to do so, adopt the use of self-inflating and specially designed safety systems.

These auto-inflating flotation devices are mounted on a paramotor's frame and are activated by a CO2 cartridge which fires upon submersion: so no pilot input is required.

Paragliding injuries mainly involve lower limbs and spine[3, 9-17] while in PPG the upper limbs are more frequently affected and spinal injuries are less common.

The different injury distribution may depend in part on the different flight dynamics and different distribution of the forces acting on the crew. This is due to the thrust of the engine and the weight of the equipment

For peer review only - <http://bmjopen.bmj.com/site/about/guidelines.xhtml>

shoulder, arm, elbow, forearm, calf, thigh and ankle, while two cases of generalised burnings were the result of actual fires caused by combustion of the engine fuel. In another case, electrical burnings to the chest and one arm were sustained following collision with high voltage power lines. Contact with power lines is an established cause of accidents in paragliding too, while burnings resulting from engine fuel combustion or contact with the engine are specific to PPG.

Indeed PPG is widely believed to be safer than paragliding, and fatal events considered to be rarer than in paragliding[1]. In our study, 6% of accidents were fatal(fatal accidents/ total number of accidents: 23/383).

This figure is not lower than the values cited in literature for paragliding and hang-gliding(table 7) and is however comparable with the 6.1% of fatal paragliding accidents reported by Schulze(2002)[18] in a study very similar to ours, which was conducted using the data from incident reports.

**Table 7. Studies on Paragliding and Hang-gliding reporting fatal outcome after accidents.**

| Sport        | Study                     | No. fatalities | No. participants | % Fatal events |
|--------------|---------------------------|----------------|------------------|----------------|
| Paragliding  | Krüger-Franke et al.[11]. | 2              | 218              | 0.91%          |
| Paragliding  | Schulze et al. [18].      | 25             | 409              | 6.10%          |
| Paragliding  | Lautenschlager et al.[19] | 1              | 86               | 1.16%          |
| Paragliding  | Fashing et al.[12]        | 0              | 70               | 0.00%          |
| Hang-gliding | Foray et al [20].         | 7              | 200              | 3.50%          |

Considering the differences between PPG and paragliding, further research on this sport and related injuries should be conducted separately from paragliding, in separate studies.

The results of this study suggest that further investigation should consider if the use of certain types of safety clothing and equipment can significantly reduce various risks specific to this sport.

The effectiveness of protective gloves to protect against hand injuries, caused by contact with the spinning prop, should be evaluated in future studies.

Since many prop strike injuries have been higher on the upper limb, where gloves would not be effective, an even better solution could be to add the so called "safety ring" to the engine cage. The

with an auto-inflating flotation device when flying near water. As in paragliding, periodical checking and maintenance of equipment (the wing and lines in particular) is essential. Additionally, in PPG, careful inspection and maintenance of the engine is vital, given that its malfunctioning could represent a cause of major injuries.

This study has some limitations.

First of all since there is no way of finding out exactly how many people knew about the existence of the database, the effect of under-reporting bias, due to the voluntary nature of our data submission, can be hardly estimated .

In addition, beeing the injury reporting form online, only powered paragliders with access to the Internet were able to participate. For this reason, even though most people use the Internet, selection bias cannot be excluded at all.

Finally the lack of a specific question in the form about the kind of injury sustained, might have led to the loss of some data even if in almost all the cases it was possible to obtain detailed information on the type of injuries by a careful reading of the narrative section of the reports. Data analysis was performed only by one researcher with no cross-check.

### **Conclusions**

This study reveals a pattern of accidents in PPG clearly different from that of paragliding: PPG accidents are more common during takeoff; weather and wind conditions have a lesser influence in causing accidents, the energy from the engine and the weight of the equipment may aggravate accidents.

The pattern of injuries sustained in this sport are distinctive: mostly involving the upper limbs, while those to the spine are less common. Finally, contrary to the belief held up to now by the experts of this sport[1], the number of fatal accidents/number of accidents is not lower than those which occur in paragliding and in hang-gliding[11, 12, 18, 19, 20](table 7).

For these reasons, PPG should be analysed separately from paragliding in distinct studies.

Further research will be useful to confirm the data of this study, to investigate the role of safety equipment such as protective gloves, safety ring and auto-inflating flotation devices and to evaluate the effectiveness of periodical checks of the engine, to reduce certain risks specific to this sport.



The study was conceived by Francesco Feletti and Jeff Goin.

Jeff Goin collected data.

Francesco Feletti carried out statistical analysis and wrote the draft of the manuscript. All authors contributed to critical revisions of the manuscript and approved the final version.

**Data sharing statement:** No additional data available.

**Competing interests:** None.

**Funding statement:** The authors received no funding for this research

For peer review only

[1] Footflyer - The source for powered paragliding information.  
[http://www.footflyer.com/safety/incidents/incidents\\_and\\_analysis.htm](http://www.footflyer.com/safety/incidents/incidents_and_analysis.htm) [Oct 2013].

[2] Feletti F. Multiple injuries in paramotoring: a case report to assess this sport's risks  
*American Journal of Sports Science* 2013; 1(1): 7-11.

[3] Rekand T The Epidemiology of injury in hang-gliding and paragliding. In Heggie TW, Caine DJ (eds): *Epidemiology of Injury in Adventure and Extreme Sports*. Med Sports Sci. Basel, Kager 2012; 58: 44-56.

[4] USPPA- United States Powered Paragliding Association. <http://www.usppamembers.org> [Oct 2013].

[5] Fuller CW, Ekstrand J, Junge A, et al. Consensus statement on injury definitions and data collection procedures in studies of football(soccer) injuries. *Clin J Sport Med* 2006; 16(2): 83-92.

[6] Fuller CW, Ekstrand J, Junge A, et al. Consensus statement on injury definitions and data collection procedures in studies of football(soccer) injuries. *Scand J Med Sci Sports* 2006; 16(2) 83-92.

[7] Fuller CW, Ekstrand J, Junge A, et al. Consensus statement on injury definitions and data collection procedures in studies of football(soccer) injuries. *Clin J Sport Med* 2006; 40(3): 193-201.

[8] Lackner CK, Schlechtriemen T, Burghofer K, et al. The Munich NACA score: Modification of the NACA score for preclinical emergency medicine. *Notfall und Rettungsmedizin* 2005, 8(2):109-111.

[9] Zeller T, Billing A, Lob G. Injuries in paragliding. *Int Orthop* 1992; 16(3) :255-9.

[10] Schneider S, Abein V, Askew CD, et al. Changes in cerebral oxygenation during parabolic flight. *Eur J Appl Physiol* 2013; 113(6): 1617-23.

[11] Krüger-Franke M, Siebert CH, Pfürringer W. Paragliding injuries. *Br J Sports Med* 1991; 25(2): 98-101.

[12] Fasching G, Schippinger G, Pretscher R. Paragliding accidents in remote areas. *Wilderness Environ Med* 1997; 8(3):129-33.

[13] Rekand T, Schaanning EE, Varga V, et al. Spinal cord injuries among paragliders in Norway. *Spinal Cord* 2008; 46(6): 412-16.

[14] Hasler RM, Hüttner HE, Keel MJ, et al. Spinal and pelvic injuries in airborne sports: a retrospective analysis from a major Swiss trauma centre. *Injury* 2012; 43(4): 440-5.

[15] Exadaktylos AK, Scwabas G, Eggli S, et al. Paragliding accidents-the spine is at risk. A study

[19] Lautenschlager S, Karli U, Matter P. Paragliding accidents-a prospective analysis in Swiss mountain regions. Z unfallchir Versicherungsmed 1993; 1: 55-56.

[20] Foray J, Abrassart S, Femmy T, et al. Hang-gliding accidents in high mountains. A propos of 200 cases. Chirurgie 1991; 117(8): 613-7.

#### FIGURE LEGENDS

Fig. 1: Paramotor in flight

Fig. 2: Serious hand lesions caused by contact with the engine prop: these injuries are specific to powered paragliding.

For peer review only

1  
2  
3  
4  
5  
6  
7  
8  
9  
10  
11  
12  
13  
14  
15  
16  
17  
18  
19  
20  
21  
22  
23  
24  
25  
26  
27  
28  
29  
30  
31  
32  
33  
34  
35  
36  
37  
38  
39  
40  
41  
42  
43  
44  
45  
46  
47  
48  
49

Keywords

**Extreme Sports, Paragliding, Sporting injuries, Adventure Sports, Powered Paragliding, Hand Injuries**

**Corresponding Author**

Francesco Feletti, MD,

Ospedale S. Maria delle Croci, Presidio Ospedaliero di Ravenna,

U.O.Radiologia, Ausl della Romagna,

Ravenna, Italy.

ExtremeSportMed,

[www.extremesportmed.org](http://www.extremesportmed.org);

e-mail: [feletti@extremesportmed.org](mailto:feletti@extremesportmed.org)

Phone: +39 393 123 0 456

**Authors**

**Francesco Feletti, MD,**

Ospedale S. Maria delle Croci, Presidio Ospedaliero di Ravenna,

U.O.Radiologia, Ausl della Romagna,

Ravenna, Italy.

ExtremeSportMed,

[www.extremesportmed.org](http://www.extremesportmed.org);

**Jeff Goin, Capt.**

For peer review only - <http://bmjopen.bmj.com/site/about/guidelines.xhtml>

B.S. Aeronautical Science, Embry Riddle Aeronautical University

## Accidents and injuries related to powered paragliding: a cross sectional study

### ABSTRACT

**Objectives** - Powered paragliding and paragliding are two totally different sports, mainly because of the use of an engine in powered paragliding. As a consequence the pattern of injuries caused by each of these two sports may be different.

**Setting** - To test this hypothesis, we analysed 384 incident reports gathered by the United States Powered Paragliding Association from 1995 to 2012.

The majority of the incidents described occurred in the US, while 26 incidents occurred elsewhere: Canada(8), Mexico(5), Panama(1), China(1), Japan(1), Malaysia(1), Indonesia(Java)(1), Europe (8): of which Spain(1), Belgium(1), United Kingdom(3), Italy(1), Romania(1), Unknown(1).

**Outcome:** to identify the most affected body area and the most common type of injury sustained in PPG, and to highlight any differences with respect to paragliding.

**Results** - The most affected body areas in PPG were the upper limbs(44.5%) followed by the lower limbs(32 %), the back(9.8,%), the head(7%), the pelvis(3.1), the chest(2.7%) and the abdomen (0.7%) (p < 0,001).

The engine caused 43 accidents(11.22%) in our study and was responsible for the majority of injuries to the upper limbs.

The number of fatal accidents is not lower than those which occur in paragliding and in hang-gliding.

**Conclusions** - To help preventing the specific injuries of powered paragliding, the most appropriate equipment should be identified.

The results of this study also suggest that in the future this sport should be analyzed separately from paragliding.

### Strengths and limitations of this study

This is the first study in literature on powered paragliding.

We analyzed a large amount of data(384 incident reports) collected from 1995 to 2012.

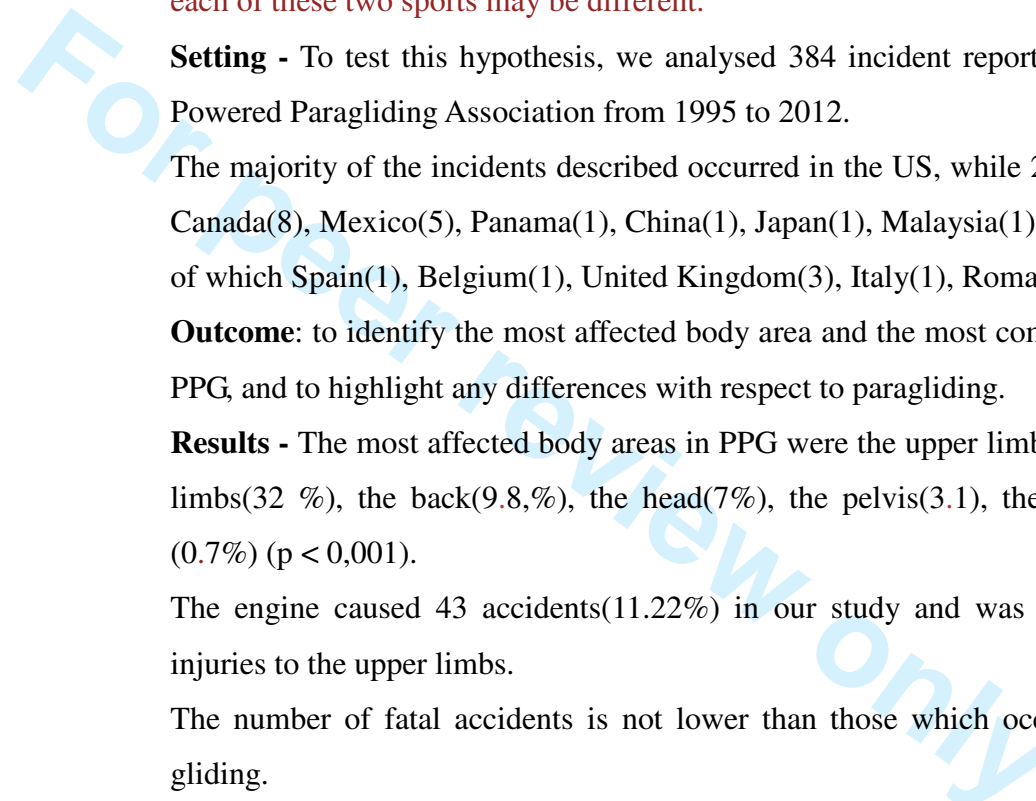

similar to that of paragliding, the sport from which it derives, under which the crew is suspended by means of long lines. **It is a sport on its own right: different because** the equipment used includes an engine, worn on the back and held in place by a harness(Fig. 1).

In contrast to paragliding, which is practised over hilly or mountaineous areas, because it requires a descent in order to take off, the PPG can take off from level ground thank to the power of the engine.

It is safer to fly over level ground because there are fewer obstacles, the thermals are not too strong and winds are generally steady.

Furthermore PPG differs from paragliding because the thrust of the engine allows the paramotor pilot to take off and fly without the need for strong winds or thermals, therefore in safer and more stable weather conditions.

Compared to other aerial sports, paragliding nevertheless remains the most similar to PPG **they** both require the pilot to keep the wing inflated by means of his own weight and skill.

PPG was invented in the 1980's and rapidly gained popularity, so much that various national and international competitions have been held throughout the world over the last few years.

In 2007 it was estimated that the sport was practised in the United States **alone, by 3000 people**[1].

It seems to be a prevalently male sport, judging from the fact that in 2013 **the number of** female members of the U.S. Powered Paragliding Association, **represented only the 2.6% of the total members.**

As PPG has grown in popularity, the number of accidents associated with this sport has inevitably increased. Knowing the accident dynamics, the type of injuries sustained and the body area affected is of vital importance for sports medicine, in order to provide an insight into the types of conduct, protective clothing and safety systems, which should be adopted to improve the safety of any given sport.

A careful examination of the literature leads us to conclude that there are no existing studies on this sport in medical literature, except from a case we had previously reported[2]: in a recent literature review[3], this sport is only mentioned among the variety of paragliding, to which it is usually grouped.

For peer review only - <http://bmjopen.bmj.com/site/about/guidelines.xhtml>

Given that the way of flying a paramotor is very different to that of a paraglider, we supposed that the accident and injury types differ greatly between the two sports as a result

The collection of the data started in 1995: we decided to use all the data available between 1995 and 2012(the starting date of the present study).

The collection of data was primarily thought for accidents in the U.S. but, since USPPA is very popular among powered paragliders worldwide, accidents from other countries were also reported. The forms submitted had been completed by the pilot involved, by a witness, or by the Association itself based on the information gathered.

The form included: drop-down menu lists, checklists and text fields.

The form consisted of five sections:

1-General information(date, time and place of the accident);

2-Pilot information: including demographic information and details of the pilot's PPG experience;

3-Details on the accident: including a description of the type of accident, the main cause, weather conditions at the time, characteristics of the takeoff and landing area, and details of the pilot's clothing and equipment;

4-Injury information: including the body parts affected, the seriousness of the injury, any medical assistance and possible collateral damage to people or things.

5-Narrative: an extensive description of the event and its consequences.

The form lacked a specific question about the nature of the injuries but a careful reading of the narrative section, allowed to obtain these information from almost all the forms.

When these data were missing they were named as 'unknown' in the results.

The reading of the narrative section was carried out by only one researcher.

The data published by the USPPA were public and anonymous; its use for study and publication purposes was authorised beforehand by the USPPA.

The data were analysed using descriptive statistics, using the software Wizard Pro 1.3.27 and the *chi-square* test.

The following definition of injury has been adopted: "any physical complaint sustained by an athlete that results from training or competition, irrespective of the need for medical attention or time lost from sports activities"[5-7].

Each incident report was also given a NACA(National Advisory Committee of Aeronautics) Score:

category.

**BMJ Open**

We subsequently focused on the accidents resulting in injuries (disregarding those with a NACA score of 0), and we divided these into 3 classes based on the severity of the injuries:

1-minor (NACA I, II), usually not requiring emergency medical measures

2-major (NACA III, IV, V, VI), almost always requiring emergency medical measures

3-fatal (NACA VII).

We associated the accidents thus classified with the accident dynamics cited in the incident reports and with the phase of flight in which the accidents occurred. We also explored the correlation between injury severity and pilot rating, and between injury severity and accident dynamics.

**Results**

At the starting date of the present study, 384 incident reports were available.

One incident report had been submitted twice, therefore one copy was retained and the other was excluded.

The pilots involved in powered paragliding accidents were aged between 24 and 72 (average age = 44.5, median = 48, SD = 9.54).

The majority of the accidents described occurred in the US, while 26 occurred elsewhere: Canada (8), Mexico (5), Panama (1), China (1), Japan (1), Malaysia (1), Indonesia (Java) (1), Europe (8): of which Spain (1), Belgium (1), United Kingdom (3), Italy (1), Romania (1), Unknown (1). Only three accidents involved a female pilot.

Pilot injuries were classified according to NACA category (table 1).

**Table 1. NACA Score of PPG accidents in this study**

| Category | Description                                                                                               | Pilots | %    |
|----------|-----------------------------------------------------------------------------------------------------------|--------|------|
| NACA 0   | No injury or disease                                                                                      | 194    | 50.6 |
| NACA I   | Slight injury or illness. No acute medical intervention necessary                                         | 59     | 15.4 |
| NACA II  | Slight to moderately heavy injury or illness. Further diagnostic examination needed or outpatient medical | 48     | 12.5 |



|          |                                                                                                                                           |    |     |
|----------|-------------------------------------------------------------------------------------------------------------------------------------------|----|-----|
| NACA IV  | Heavy injury or illness where rapid development into a life threatening condition can not be excluded. Emergency medical care is required | 11 | 2.9 |
| NACA V   | Acute vital(life threatening) danger                                                                                                      | 5  | 1.3 |
| NACA VI  | Breath and/or cycle stop and/or reanimation                                                                                               |    |     |
| NACA VII | Death                                                                                                                                     | 23 | 6   |

The following factors were taken into consideration:, the phase of flight during which the accident took place(table 2), the primary cause(table 3) and the type of accident(table 4).

As for the experience of the pilots involved, pilot rating was distributed as follows: 25.5% PPG2 (pilots who have an experience of 40 or more flights[4]), 13.5% PPG1(experience of 2 flights or more), 15.1% PPG3(experience of 200 or more flights), 9.1% Instructor, 12.8% None, 11.7% Not applicable, 6% Unknown, 1.8% Other.

No statistically significant correlation was found in our sample between accident severity and pilot rating(*chi-square*,  $p= 0.044$ ).

With reference to the place where the accidents occurred, these are the following data: 70.5% flat terrain, 11.4% not applicable, 8.8% hilly terrain, 2.6% water, 2.6 % mountainous terrain, 2.6% unknown data, 1.3% other.

**Table 2. Phase of Flight**

| Phase of Flight                         | Count | %     |
|-----------------------------------------|-------|-------|
| Takeoff (including inflation and runup) | 165   | 43%   |
| Cruise                                  | 107   | 27.9% |
| Landing (including approach and after   | 55    | 14.3% |

1  
2  
3  
4  
5  
6  
7  
8  
9  
10  
11  
12  
13  
14  
15  
16  
17  
18  
19  
20  
21  
22  
23  
24  
25  
26  
27  
28  
29  
30  
31  
32  
33  
34  
35  
36  
37  
38  
39  
40  
41  
42  
43  
44  
45  
46  
47  
48  
49

Table 3. Primary Cause of Accidents

| Primary cause                                        | BMJ Open | Tot. | %    |
|------------------------------------------------------|----------|------|------|
| Pilot Errors (only)                                  |          | 205  | 53.5 |
| Mechanical Failure (including fuel exhaustion)       |          | 67   | 17.5 |
| Pilot Error & Weather                                |          | 17   | 4.4  |
| Pilot Error & Mechanical Failure                     |          | 17   | 4.4  |
| Weather (Gust, Thermal, Rain, Wind increase, etc..). |          | 22   | 5.7  |
| Not Applicable/unknown                               |          | 24   | 4.4  |
| Other (including wake Tight takeoff/LZ Area)         |          | 31   | 1.8  |

Table 4. Type of Accidents

| Type                                         | Tot. | %    |
|----------------------------------------------|------|------|
| Collision with Terrain/Obstruction on Ground | 76   | 19.8 |
| Powerplant Equipment Malfunction             | 58   | 15.1 |
| Body contact with spinning prop              | 43   | 11.2 |
| Hard Landing                                 | 40   | 10.4 |
| Fall                                         | 37   | 9.7  |
| Wing Malfunction or Deflation                | 35   | 9.1  |
| Other                                        | 29   | 7.5  |
| Handling                                     | 20   | 5.2  |
| Line Tangle/Damage                           | 15   | 3.9  |
| Collision with other Aircraft/Ultralight     | 14   | 3.6  |
| Water Immersion                              | 10   | 2.6  |
| Other/Not Applicable                         | 35   | 1.5  |

For peer review only - <http://bmjopen.bmj.com/site/about/guidelines.xhtml>

To identify the most affected body areas and therefore most **critical for** the development of

protective clothing, we calculated the number of injuries sustained in each body area (table 5). On a

| region            | area     | Cases | (number of cases)<br>BMJ Open                                                                                                                                                                  | injuries  |
|-------------------|----------|-------|------------------------------------------------------------------------------------------------------------------------------------------------------------------------------------------------|-----------|
| <b>Head</b>       | Head     | 7     | Concussions(3), unknown(2), contusions(1), open wounds(1)                                                                                                                                      | 18 7%     |
|                   | Neck     | 3     | Burnings(1), C2 fracture(1), unknown(1)                                                                                                                                                        |           |
|                   | Face     | 8     | Fractures(4>), lacerations(2), burnings(1), other(1)                                                                                                                                           |           |
| <b>Chest</b>      | Chest    | 7     | Rib fractures(2), abrasions(1), burnings(1), contusions(1), open wounds(1), unkown(1)                                                                                                          | 7 2.7%    |
| <b>Upper Limb</b> | Shoulder | 32    | Fractures(6), open wounds(5), bruising(4), other(3), tendon injuries(3), dislocations(2), lacerations(2), unknown(2), abrasions (1), burnings(1), contusions(1), muscle strains(1), sprains(1) | 114 44.5% |
|                   | Arm      | 26    | Lacerations(7), burnings(5), contusions(3), fractures(3), unknown(3), open wounds(2), tendon rupture(1), abrasions(1), sprains(1)                                                              |           |
|                   | Forearm  | 11    | Burnings(2), lacerations(2), fractures(2), unknown(2), contusions(1) open wounds(1), soft tissue injuries(1)                                                                                   |           |
|                   | Wrist    | 8     | Fractures(3), contusions(2), lacerations(1), other(1), sprains(1)                                                                                                                              |           |
|                   | Elbow    | 5     | Open wounds(2), abrasions(1), burnings(1), unknown(1)                                                                                                                                          |           |
|                   | Hand     | 32    | Fractures(17; 11with amputation), open wounds(6), lacerations(3), contusion(2), muscle strains(1), other(1), sprains(1), unknown(1)                                                            |           |
| <b>Abdomen</b>    | Abdomen  | 2     | Contusion(1), soft tissue(1) ,                                                                                                                                                                 | 2 0.7%    |
| <b>Back</b>       | Back     | 25    | Fractures(8), unknown(8), other(3), contusions(2), abrasions(1), burnings(1), muscle strains(1), open wounds(1)                                                                                | 25 9.7%   |
| <b>Pelvis</b>     | Pelvis   | 8     | Fractures(4), contusion(1), internal bruising(1), muscle strain(1), other(1)                                                                                                                   | 8 3.1%    |
| <b>Lower Limb</b> | Thigh    | 13    | Fractures(4), contusions(2), lacerations(2), open wounds(2), abrasion(1), burnings(1), unknown(1)                                                                                              | 82 32%    |
|                   | Knee     | 19    | Contusions(4), sprains(4), lacerations(2), ligament ruptures(2), unknown(2), abrasions(1), dislocations(1), meniscus and ligament tears(1), muscle strains(1), others(1)                       |           |
|                   | Calf     | 17    | Fractures(7), burnings(2), contusions(2), lacerations(2), unknown(2), wounds(2)                                                                                                                |           |
|                   | Ankle    | 22    | Sprains(8), fractures(5), contusions(3), unknown(3), dislocations(1), ligament ruptures(1), other(1)                                                                                           |           |
|                   | Foot     | 11    | Fracture(3), unknown(3), contusions(2), other(2), lacerations(1)                                                                                                                               |           |

1  
2  
3  
4  
5  
6  
7  
8  
9  
10  
11  
12  
13  
14  
15  
16  
17  
18  
19  
20  
21  
22  
23  
24  
25  
26  
27  
28  
29  
30  
31  
32  
33  
34  
35  
36  
37  
38  
39  
40  
41  
42  
43  
44  
45  
46  
47  
48  
49

Another two accidents were fatal due to cerebral spine fractures with spinal cord damage.

In four cases, death was caused by severe head trauma. In all remaining cases, death was the result of high-energy multi-trauma, although the reports do not allow us to identify the precise injuries responsible for death.

Most of the injuries were minor ones(NACA I-II) followed by major ones(NACA III-VI) and fatal ones(NACA VII).

No significant difference was found in the distribution of fatal, major and minor injuries among the three main phases of flight(takeoff including inflation and runup, cruise and landing including approach).

With regard to the relationship between accident dynamic and accident severity, accidents due to body contact with spinning prop and wing malfunction/deflation caused prevalently major injuries(NACA III-VI): 55.6% and 56.2% respectively.

Accidents due to water immersion were prevalently fatal(71.4%).

The other dynamics of injuries cause mainly minor injuries(NACA I-II).

A statistical correlation between injury severity and type of accident was found(chi-square,  $p < 0.021$ ; confidence 95%); severity of injuries by type of accident is shown in Table 6.

**Table 6. Severity of Injuries by Type of Accident**

| Type of Accident                             | Minor (%) | Major (%) | Fatal (%) |
|----------------------------------------------|-----------|-----------|-----------|
| Collision with Terrain/Obstruction on Ground | 62.5      | 18.8      | 18.8      |
| Powerplant Equipment Malfunction             | 100       | 0         | 0         |
| Body contact with spinning prop              | 44.4      | 55.6      | 0         |
| Hard Landing                                 | 74.1      | 22.2      | 3.7       |
| Fall                                         | 54.5      | 40.9      | 4.5       |
| Wing Malfunction or Deflation                | 31.2      | 56.2      | 12.5      |
| Other                                        | 80        | 0         | 20        |
| Handling                                     | 53.8      | 23.1      | 23.1      |
| Line Tangle/Damage                           | 100       | 0         | 0         |
| Collision with other                         | 40        | 40        | 20        |

1  
2  
3  
4  
5  
6  
7  
8  
9  
10  
11  
12  
13  
14  
15  
16  
17  
18  
19  
20  
21  
22  
23  
24  
25  
26  
27  
28  
29  
30  
31  
32  
33  
34  
35  
36  
37  
38  
39  
40  
41  
42  
43  
44  
45  
46  
47  
48  
49

The correlation between accident severity and pilot rating is scarcely significant(*chi-square*,  $p=0.044$ ; confidence 95%).

The data on the collateral damage from the various accidents reveal that in addition to the 383 pilots directly involved, seven bystanders and sixteen pilots of other aircrafts involved in collisions were also injured, for a total of 406 people. The data are insufficient to precisely classify the severity of the injuries suffered by these people. No injuries were sustained in thirteen cases.

### Discussion

In our study, the weather conditions were a main or contributing cause of 10.1% of accidents: weather conditions alone were the cause of 5.7% of accidents, while the weather conditions contributed to the accident together with pilot error in 4.4% of accidents. This figure is much lower than the one reported in paragliding by Zeller[9], who mentions adverse weather conditions as a cause in 19% of paragliding accidents.

This can be explained by the fact that an engine allows to fly frequently and in a much wider variety of weather conditions, so pilots are less likely to risk flying in extreme and hazardous conditions. Nevertheless, our study clearly shows that the use of an engine influences the accident dynamics. It can itself be the cause of accidents, it can be an important aggravating factor in the event of an accident or it can also be the direct cause of injuries.

This study shows that takeoff is the most dangerous phase of flight in PPG (32.9% of the accidents took place during this phase of flight; or 43% if we include those during run-up and inflation, phases which can be considered an integral part of takeoff with a paramotor), while in paragliding, the most dangerous phase is landing[3,9].

This can be explained by the fact that takeoff with a PPG requires a delicate balance between the thrust of the engine, the weight of the crew and the lift of the wing. Additionally, the takeoff from level ground and the prevalently horizontal thrust of the engine results in the pilot moving away from the ground slowly, as opposed to paragliding, where the distance from the ground increases rapidly due to taking off from a slope.

As a result, falling distance remains reduced for much longer during takeoff with a PPG than it does with a paragliding, limiting the possibility of adopting emergency manoeuvres and making the use

overall weight of the equipment and accompanying power-plant, vary between 20 and 40 kg. In the case of collision, both of these factors synergize to make the impact more traumatic given that engine displacement varies between 80cc and 250cc and engine power varies between 11 to 22.5kW; engine thrust is at its highest during takeoff: the phase of flight when PPG accidents occur most frequently.

In certain reports it is explicitly mentioned that it was precisely the energy supplied by the engine which made the impact fatal.

Various reports also describe that pilot errors had been to some extent determined by a state of mental confusion suffered by the pilot during the execution of acrobatic stunts.

Steep spirals are extremely dangerous manoeuvres in PPG; the position of the crew and the centrifugal acceleration (increased by the thrust of the engine) may reduce blood supply to the brain, and could cause momentary state of mental confusion or even blackouts at a time when the maximum level of attention is required[10].

In the case of immersion in water, the weight of the engine can drag the pilot rapidly under the surface, without giving him time to free himself from the equipment, making this type of accident particularly feared among paramotor pilots. In our study, this dynamic was responsible for 21.7 % of fatal accidents(71.4% of accidents involving water immersion were fatal) and a serious (non-fatal) case of near-drowning. It is therefore inadvisable to fly a paramotor over or near water; it is essential that pilots, wishing to do so, adopt the use of self-inflating and specially designed safety systems.

These auto-inflating flotation devices are mounted on a paramotor's frame and are activated by a CO2 cartridge which fires upon submersion: so no pilot input is required.

Paragliding injuries mainly involve lower limbs and spine[3, 9-17] while in PPG the upper limbs are more frequently affected and spinal injuries are less common.

The different injury distribution may depend in part on the different flight dynamics and different distribution of the forces acting on the crew. This is due to the thrust of the engine and the weight of the equipment.

The engine is undoubtedly the factor which distinguishes PPG from paragliding in terms of injury type; contact with the propeller caused 43 accidents(11.22%) in our study and was responsible for the majority of injuries to the upper limbs, in particular lesions to the hands(Fig. 2), wrists,

Contact with power lines is an established cause of accidents in paragliding too, while burnings resulting from engine fuel combustion or contact with the engine are specific to PPG.

Indeed PPG is widely believed to be safer than paragliding, and fatal events considered to be rarer than in paragliding[1]. In our study, 6% of accidents were fatal (fatal accidents/ total number of accidents: 23/383).

This figure is not lower than the values cited in literature for paragliding and hang-gliding(table 7) and is however comparable with the 6.1% of fatal paragliding accidents reported by Schulze(2002)[18] in a study very similar to ours, which was conducted using the data from incident reports.

**Table 7. Studies on Paragliding and Hang-gliding reporting fatal outcome after accidents.**

| Sport        | Study                      | No. fatalities | No. participants | % Fatal events |
|--------------|----------------------------|----------------|------------------|----------------|
| Paragliding  | Krüger-Franke et al.[11].  | 2              | 218              | 0.91%          |
| Paragliding  | Schulze et al.[18].        | 25             | 409              | 6.10%          |
| Paragliding  | Lautenschlager et al. [19] | 1              | 86               | 1.16%          |
| Paragliding  | Fashing et al.[12]         | 0              | 70               | 0.00%          |
| Hang-gliding | Foray et al.[20].          | 7              | 200              | 3.50%          |

Considering the differences between PPG and paragliding, further research on this sport and related injuries should be conducted separately from paragliding, in separate studies.

The results of this study suggest that further investigation should consider if the use of certain types of safety clothing and equipment can significantly reduce various risks specific to this sport.

The effectiveness of protective gloves to protect against hand injuries, caused by contact with the spinning prop, should be evaluated in future studies.

Since many prop strike injuries have been higher on the upper limb, where gloves would not be effective, an even better solution could be to add the so called "safety ring" to the engine cage. The safety ring is an aluminum ring, that mounts just forward the radial arms, with the same radius as the prop. The safety ring is designed to make it difficult for an open human hand to reach the prop at full rated thrust and it adds very little in terms of expense and weight to the equipment.

1  
2  
3  
4  
5  
6  
7  
8  
9  
10  
11  
12  
13  
14  
15  
16  
17  
18  
19  
20  
21  
22  
23  
24  
25  
26  
27  
28  
29  
30  
31  
32  
33  
34  
35  
36  
37  
38  
39  
40  
41  
42  
43  
44  
45  
46  
47  
48  
49

This study has some limitations.

First of all since there is no way of finding out exactly how many people knew about the existence of the database, the effect of under-reporting bias, due to the voluntary nature of our data submission, can be hardly estimated .

In addition, being the injury reporting form online, only powered paragliders with access to the Internet were able to participate. For this reason, even though most people use the Internet, selection bias cannot be excluded at all.

Finally the lack of a specific question in the form about the kind of injury sustained, might have led to the loss of some data even if in almost all the cases it was possible to obtain detailed information on the type of injuries by a careful reading of the narrative section of the reports. **Data analysis was performed only by one researcher with no cross-check.**

### **Conclusions**

This study reveals a pattern of accidents in PPG clearly different from that of paragliding: PPG accidents are more common during takeoff; weather and wind conditions have a lesser influence in causing accidents, the energy from the engine and the weight of the equipment may aggravate accidents.

The pattern of injuries sustained in this sport are distinctive: mostly involving the upper limbs, while those to the spine are less common. Finally, contrary to the belief held up to now by the experts of this sport[1], the number of fatal accidents/number of accidents is not lower than those which occur in paragliding and in hang-gliding[11, 12, 18, 19, 20](table 7).

For these reasons, PPG should be analysed separately from paragliding in distinct studies.

Further research will be useful to confirm the data of this study, to investigate the role of safety equipment such as protective gloves, safety ring and auto-inflating flotation devices and to evaluate the effectiveness of periodical checks of the engine, to reduce certain risks specific to this sport.

### **Contributorship Statement**

For peer review only - <http://bmjopen.bmj.com/site/about/guidelines.xhtml>  
The study was conceived by Francesco Feletti and Jeff Goin.

Jeff Goin collected data.



**REFERENCES**

- [1] Footflyer- The source for powered paragliding information.  
[http://www.footflyer.com/Safety/Incidents/incidents\\_and\\_analysis.htm](http://www.footflyer.com/Safety/Incidents/incidents_and_analysis.htm) [Oct 2013].
- [2] Feletti F. Multiple injuries in paramotoring: a case report to assess this sport's risks  
*American Journal of Sports Science* 2013; 1(1): 7-11.
- [3] Rekand T The Epidemiology of injury in hang-gliding and paragliding. In Heggie TW, Caine DJ (eds): *Epidemiology of Injury in Adventure and Extreme Sports*. Med Sports Sci. Basel, Kager 2012; 58: 44-56.
- [4] USPPA- United States Powered Paragliding Association. <http://www.usppamembers.org> [Oct 2013].
- [5] Fuller CW, Ekstrand J, Junge A, et al. Consensus statement on injury definitions and data collection procedures in studies of football(soccer) injuries. *Clin J Sport Med* 2006; 16(2): 83-92.
- [6] Fuller CW, Ekstrand J, Junge A, et al. Consensus statement on injury definitions and data collection procedures in studies of football(soccer) injuries. *Scand J Med Sci Sports* 2006; 16(2) 83-92.
- [7] Fuller CW, Ekstrand J, Junge A, et al. Consensus statement on injury definitions and data collection procedures in studies of football(soccer) injuries. *Clin J Sport Med* 2006; 40(3): 193-201.
- [8] Lackner CK, Schlechtriemen T, Burghofer K, et al. The Munich NACA score: Modification of the NACA score for preclinical emergency medicine. *Notfall und Rettungsmedizin* 2005, 8(2):109-111.
- [9] Zeller T, Billing A, Lob G. Injuries in paragliding. *Int Orthop* 1992; 16(3) :255-9.
- [10] Schneider S, Abein V, Askew CD, et al. Changes in cerebral oxygenation during parabolic flight. *Eur J Appl Physiol* 2013; 113(6): 1617-23.
- [11] Krüger-Franke M, Siebert CH, Pfürringer.W. Paragliding injuries. *Br J Sports Med* 1991; 25(2): 98-101.
- [12] Fasching G, Schippinger G, Pretscher R. Paragliding accidents in remote areas. *Wilderness Environ Med* 1997; 8(3):129-33.
- [13] Rekand T, Schaanning EE, Varga V, et al. Spinal cord injuries among paragliders in Norway. *Spinal Cord* 2008; 46(6): 412-16.

[16] Gauler R, Moulin P, Koch HG, et al. Paragliding accidents with spinal cord injury: 10 years' experience at a single institution. *BMJ Open* 2006; 31(10): 1125-30.

[17] Laver L, Mei Dan O. Paragliding. In Mei Dan O, Carmont M. *Adventure and Extreme Sports Injuries*. Springer-Verlag London 2013; 12: 247-72.

[18] Schulze W, Richter J, Schulze B, et al. Injury prophylaxis in paragliding. *Br J Sports Med* 2002; 36: 365-69.

[19] Lautenschlager S, Karli U, Matter P. Paragliding accidents-a prospective analysis in Swiss mountain regions. *Z unfallchir Versicherungsmed* 1993; 1: 55-56.

[20] Foray J, Abrassart S, Femmy T, et al. Hang-gliding accidents in high mountains. A propos of 200 cases. *Chirurgie* 1991; 117(8): 613-7.

**FIGURE LEGENDS**

Fig. 1: Paramotor in flight

Fig. 2: Serious hand lesions caused by contact with the engine prop: these injuries are specific to powered paragliding.

For peer review only

1  
2  
3  
4  
5  
6  
7  
8  
9  
10  
11  
12  
13  
14  
15  
16  
17  
18  
19  
20  
21  
22  
23  
24  
25  
26  
27  
28  
29  
30  
31  
32  
33  
34  
35  
36  
37  
38  
39  
40  
41  
42  
43  
44  
45  
46  
47  
48  
49

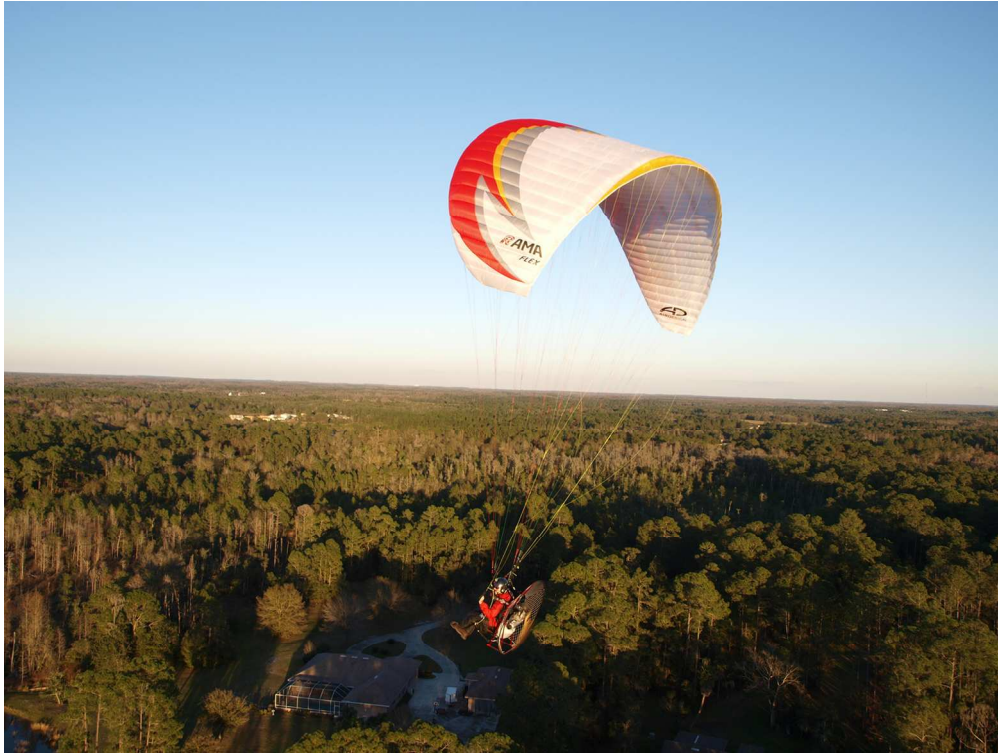

Figure 1: Paramotor in flight  
134x101mm (300 x 300 DPI)

ew only

1  
2  
3  
4  
5  
6  
7  
8  
9  
10  
11  
12  
13  
14  
15  
16  
17  
18  
19  
20  
21  
22  
23  
24  
25  
26  
27  
28  
29  
30  
31  
32  
33  
34  
35  
36  
37  
38  
39  
40  
41  
42  
43  
44  
45  
46  
47  
48  
49  
50  
51  
52  
53  
54  
55  
56  
57  
58  
59  
60

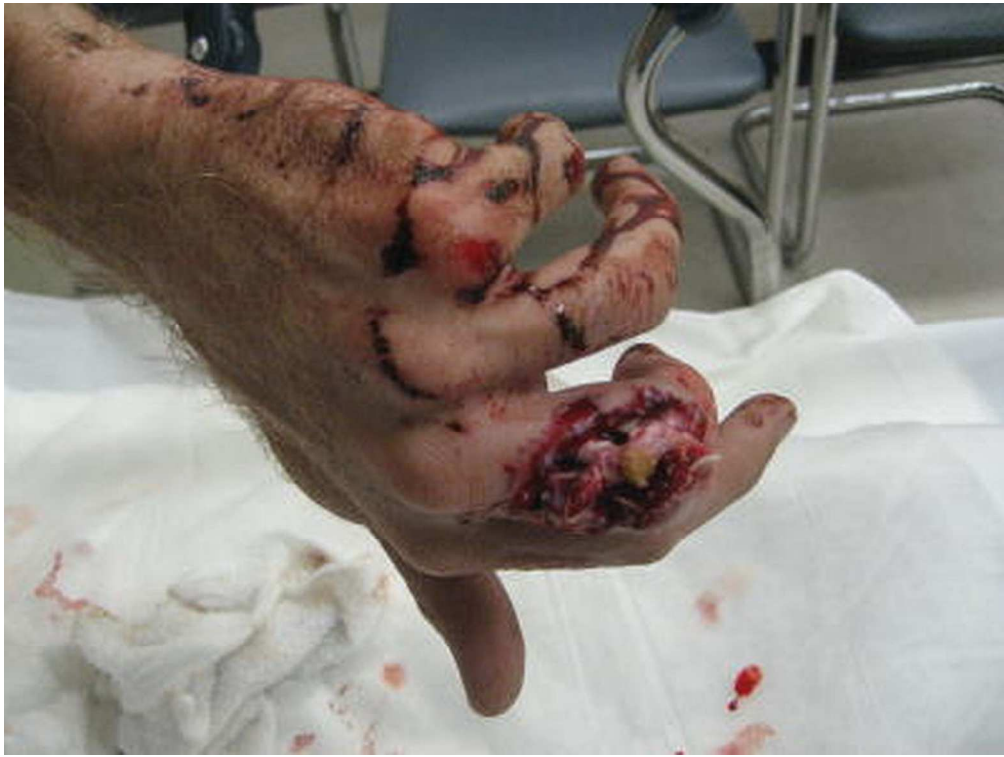

Fig. 2: Serious hand lesions caused by contact with the engine prop: these injuries are specific to powered paragliding.

90x67mm (300 x 300 DPI)

ew only

## STROBE Statement—checklist of items that should be included in reports of observational studies

|                              | Item No | Recommendation                                                                                                                                                                                                                                                                                                                                                                                                                                                                                                           |
|------------------------------|---------|--------------------------------------------------------------------------------------------------------------------------------------------------------------------------------------------------------------------------------------------------------------------------------------------------------------------------------------------------------------------------------------------------------------------------------------------------------------------------------------------------------------------------|
| <b>Title and abstract</b>    | 1       | (a) Indicate the study's design with a commonly used term in the title or the abstract<br>(b) Provide in the abstract an informative and balanced summary of what was done and what was found                                                                                                                                                                                                                                                                                                                            |
| <b>Yes</b>                   |         |                                                                                                                                                                                                                                                                                                                                                                                                                                                                                                                          |
| <b>Introduction</b>          |         |                                                                                                                                                                                                                                                                                                                                                                                                                                                                                                                          |
| Background/rationale         | 2       | Explain the scientific background and rationale for the investigation being reported                                                                                                                                                                                                                                                                                                                                                                                                                                     |
| <b>Yes</b>                   |         |                                                                                                                                                                                                                                                                                                                                                                                                                                                                                                                          |
| Objectives                   | 3       | State specific objectives, including any prespecified hypotheses                                                                                                                                                                                                                                                                                                                                                                                                                                                         |
| <b>Yes</b>                   |         |                                                                                                                                                                                                                                                                                                                                                                                                                                                                                                                          |
| <b>Methods</b>               |         |                                                                                                                                                                                                                                                                                                                                                                                                                                                                                                                          |
| Study design                 | 4       | Present key elements of study design early in the paper                                                                                                                                                                                                                                                                                                                                                                                                                                                                  |
| <b>Yes</b>                   |         |                                                                                                                                                                                                                                                                                                                                                                                                                                                                                                                          |
| Setting                      | 5       | Describe the setting, locations, and relevant dates, including periods of recruitment, exposure, follow-up, and data collection                                                                                                                                                                                                                                                                                                                                                                                          |
| <b>Yes</b>                   |         |                                                                                                                                                                                                                                                                                                                                                                                                                                                                                                                          |
| Participants                 | 6       | (a) <i>Cohort study</i> —Give the eligibility criteria, and the sources and methods of selection of participants. Describe methods of follow-up<br><i>Case-control study</i> —Give the eligibility criteria, and the sources and methods of case ascertainment and control selection. Give the rationale for the choice of cases and controls<br><i>Cross-sectional study</i> —Give the eligibility criteria, and the sources and methods of selection of participants                                                   |
| <b>Yes</b>                   |         | (b) <i>Cohort study</i> —For matched studies, give matching criteria and number of exposed and unexposed<br><i>Case-control study</i> —For matched studies, give matching criteria and the number of controls per case                                                                                                                                                                                                                                                                                                   |
| Variables                    | 7       | Clearly define all outcomes, exposures, predictors, potential confounders, and effect modifiers. Give diagnostic criteria, if applicable                                                                                                                                                                                                                                                                                                                                                                                 |
| <b>Yes</b>                   |         |                                                                                                                                                                                                                                                                                                                                                                                                                                                                                                                          |
| Data sources/<br>measurement | 8*      | For each variable of interest, give sources of data and details of methods of assessment (measurement). Describe comparability of assessment methods if there is more than one group                                                                                                                                                                                                                                                                                                                                     |
| <b>Yes</b>                   |         |                                                                                                                                                                                                                                                                                                                                                                                                                                                                                                                          |
| Bias                         | 9       | Describe any efforts to address potential sources of bias                                                                                                                                                                                                                                                                                                                                                                                                                                                                |
| <b>Yes</b>                   |         |                                                                                                                                                                                                                                                                                                                                                                                                                                                                                                                          |
| Study size                   | 10      | Explain how the study size was arrived at                                                                                                                                                                                                                                                                                                                                                                                                                                                                                |
| <b>Yes</b>                   |         |                                                                                                                                                                                                                                                                                                                                                                                                                                                                                                                          |
| Quantitative variables       | 11      | Explain how quantitative variables were handled in the analyses. If applicable, describe which groupings were chosen and why                                                                                                                                                                                                                                                                                                                                                                                             |
| <b>Yes</b>                   |         |                                                                                                                                                                                                                                                                                                                                                                                                                                                                                                                          |
| Statistical methods          | 12      | (a) Describe all statistical methods, including those used to control for confounding<br>(b) Describe any methods used to examine subgroups and interactions<br>(c) Explain how missing data were addressed<br>(d) <i>Cohort study</i> —If applicable, explain how loss to follow-up was addressed<br><i>Case-control study</i> —If applicable, explain how matching of cases and controls was addressed<br><i>Cross-sectional study</i> —If applicable, describe analytical methods taking account of sampling strategy |
| <b>Yes</b>                   |         | (e) Describe any sensitivity analyses                                                                                                                                                                                                                                                                                                                                                                                                                                                                                    |

1  
2  
3  
4  
5  
6  
7  
8  
9  
10  
11  
12  
13  
14  
15  
16  
17  
18  
19  
20  
21  
22  
23  
24  
25  
26  
27  
28  
29  
30  
31  
32  
33  
34  
35  
36  
37  
38  
39  
40  
41  
42  
43  
44  
45  
46  
47  
48  
49  
50  
51  
52  
53  
54  
55  
56  
57  
58  
59  
60

Continued on next page

For peer review only

**Results**

|                                |     |                                                                                                                                                                                                                                                                                                                                                                                                               |
|--------------------------------|-----|---------------------------------------------------------------------------------------------------------------------------------------------------------------------------------------------------------------------------------------------------------------------------------------------------------------------------------------------------------------------------------------------------------------|
| Participants<br><b>Yes</b>     | 13* | (a) Report numbers of individuals at each stage of study—eg numbers potentially eligible, examined for eligibility, confirmed eligible, included in the study, completing follow-up, and analysed<br>(b) Give reasons for non-participation at each stage<br>(c) Consider use of a flow diagram                                                                                                               |
| Descriptive data<br><b>Yes</b> | 14* | (a) Give characteristics of study participants (eg demographic, clinical, social) and information on exposures and potential confounders<br>(b) Indicate number of participants with missing data for each variable of interest<br>(c) <i>Cohort study</i> —Summarise follow-up time (eg, average and total amount)                                                                                           |
| Outcome data<br><b>Yes</b>     | 15* | <i>Cohort study</i> —Report numbers of outcome events or summary measures over time<br><i>Case-control study</i> —Report numbers in each exposure category, or summary measures of exposure<br><i>Cross-sectional study</i> —Report numbers of outcome events or summary measures                                                                                                                             |
| Main results<br><b>Yes</b>     | 16  | (a) Give unadjusted estimates and, if applicable, confounder-adjusted estimates and their precision (eg, 95% confidence interval). Make clear which confounders were adjusted for and why they were included<br>(b) Report category boundaries when continuous variables were categorized<br>(c) If relevant, consider translating estimates of relative risk into absolute risk for a meaningful time period |
| Other analyses<br><b>Yes</b>   | 17  | Report other analyses done—eg analyses of subgroups and interactions, and sensitivity analyses                                                                                                                                                                                                                                                                                                                |

**Discussion**

|                                |    |                                                                                                                                                                            |
|--------------------------------|----|----------------------------------------------------------------------------------------------------------------------------------------------------------------------------|
| Key results<br><b>Yes</b>      | 18 | Summarise key results with reference to study objectives                                                                                                                   |
| Limitations<br><b>Yes</b>      | 19 | Discuss limitations of the study, taking into account sources of potential bias or imprecision. Discuss both direction and magnitude of any potential bias                 |
| Interpretation<br><b>Yes</b>   | 20 | Give a cautious overall interpretation of results considering objectives, limitations, multiplicity of analyses, results from similar studies, and other relevant evidence |
| Generalisability<br><b>Yes</b> | 21 | Discuss the generalisability (external validity) of the study results                                                                                                      |

**Other information**

|                       |    |                                                                                                                                                               |
|-----------------------|----|---------------------------------------------------------------------------------------------------------------------------------------------------------------|
| Funding<br><b>Yes</b> | 22 | Give the source of funding and the role of the funders for the present study and, if applicable, for the original study on which the present article is based |
|-----------------------|----|---------------------------------------------------------------------------------------------------------------------------------------------------------------|

\*Give information separately for cases and controls in case-control studies and, if applicable, for exposed and unexposed groups in cohort and cross-sectional studies.

**Note:** An Explanation and Elaboration article discusses each checklist item and gives methodological background and published examples of transparent reporting. The STROBE checklist is best used in conjunction with this article (freely available on the Web sites of PLoS Medicine at <http://www.plosmedicine.org/>, Annals of Internal Medicine at <http://www.annals.org/>, and Epidemiology at <http://www.epidem.com/>). Information on the STROBE Initiative is available at [www.strobe-statement.org](http://www.strobe-statement.org).
